# Supplementary material for: A Genetic Screen and Transcript Profiling Reveal a Shared Regulatory Program for Drosophila Linker Histone H1 and Chromatin Remodeler CHD1
Source: PubMed Central journal article supplement (PMC4390582; doi:10.1534/g3.115.016709), 2015-01-27
Supplement: supp_g3.115.016709_016709SI.pdf [file supp_g3.115.016709_016709SI.pdf]

**A Genetic Screen and Transcript Profiling Reveal a Shared Regulatory Program for *Drosophila* Linker Histone H1 and Chromatin Remodeler CHD1**

Harsh Kavi, Xingwu Lu, Na Xu, Boris A. Bartholdy, Elena Vershilova, Arthur I. Skoultchi<sup>4</sup>, and Dmitry V. Fyodorov<sup>4</sup>

Department of Cell Biology, Albert Einstein College of Medicine, 1300 Morris Park Avenue, Bronx, NY 10461, USA

<sup>4</sup> Corresponding authors: Department of Cell Biology, Albert Einstein College of Medicine, 1300 Morris Park Avenue, Bronx, NY 10461, USA. E-mail: arthur.skoultchi@einstein.yu.edu, dmitry.fyodorov@einstein.yu.edu

**DOI: 10.1534/g3.115.016709**

**Table S1 GO term analyses of genetic modifiers of *His1* effect on viability.**

| Gene Symbol                                                                        | Biological evidence for the gene and/or gene product                                                                                                                                                                                                                               | Reference(s)                                                                                      |
|------------------------------------------------------------------------------------|------------------------------------------------------------------------------------------------------------------------------------------------------------------------------------------------------------------------------------------------------------------------------------|---------------------------------------------------------------------------------------------------|
| <b>Chromosome organization (biological function), GO:0051276</b>                   |                                                                                                                                                                                                                                                                                    |                                                                                                   |
| <i>nopo</i>                                                                        | Fly homolog of human E3 ligase TRIP; interacts with DNA polymerase $\eta$ , regulates S to M transition during syncytial nuclear divisions.                                                                                                                                        | (Wallace et al. 2014)<br>(Merkle et al. 2009)                                                     |
| <i>AGO1</i>                                                                        | Component of miRNA-specific silencing machinery; was shown to regulate nuclear organization of PcG target loci.                                                                                                                                                                    | (Williams and Rubin 2002)<br>(Grimaud et al. 2006)                                                |
| <i>CG3358</i>                                                                      | Fly ortholog of TatD-related DNase TATDN1 that plays an important role in mitotic chromosome segregation.                                                                                                                                                                          | (Yang et al. 2012)                                                                                |
| <i>Sep5</i>                                                                        | Nuclear GTPase and a component of microtubule-associated complex involved in cytokinesis.                                                                                                                                                                                          | (Hughes et al. 2008)<br>(Goldstein and Gunawardena 2000)                                          |
| <i>E(Pc)</i>                                                                       | Contributes to chromatin-dependent silencing; is not present in PRC1 or PRC2 but, rather, is a subunit of histone acetyltransferase complex TIP60 involved in both gene activation and repression; interacts with <i>ISWI</i> , which is involved in H1 deposition into chromatin. | (Sinclair et al. 1998)<br>(Stankunas et al. 1998)<br>(Kusch et al. 2004)<br>(Arancio et al. 2010) |
| <i>Elba2</i>                                                                       | BEN domain-containing protein; associates with the <i>Fab-7</i> boundary/insulator element, promotes chromatin silencing.                                                                                                                                                          | (Aoki et al. 2012)                                                                                |
| <i>Socs36E</i>                                                                     | SH2 domain-containing suppressor of cytokine signaling; a negative regulator of the JAK/STAT cascade, which is involved, together with H1, in the establishment of heterochromatin silencing.                                                                                      | (Singh et al. 2010)<br>(Xu et al. 2014)                                                           |
| <i>c(2)M</i>                                                                       | Component of the synaptonemal complex; required for reciprocal meiotic recombination.                                                                                                                                                                                              | (Heidmann et al. 2004)                                                                            |
| <i>Chd1</i>                                                                        | ATP-dependent nucleosome remodeling motor protein; essential for chromatin assembly in the nascent male pronucleus and for deposition of H3.3 at transcriptionally active loci.                                                                                                    | (Konev et al. 2007)                                                                               |
| <b>DNA binding (molecular function), GO:0003677</b>                                |                                                                                                                                                                                                                                                                                    |                                                                                                   |
| <i>bsh</i>                                                                         | Brain-specific homeobox protein.                                                                                                                                                                                                                                                   | (Hasegawa et al. 2013)                                                                            |
| <i>vis</i>                                                                         | Homeobox-containing TGIF-related transactivator.                                                                                                                                                                                                                                   | (Hyman et al. 2003)                                                                               |
| <i>inv</i>                                                                         | Helix-turn-helix transcription factor.                                                                                                                                                                                                                                             | (Simmonds et al. 1995)                                                                            |
| <i>zf30C</i>                                                                       | Zinc finger transcription factor.                                                                                                                                                                                                                                                  | (Jafari et al. 2012)                                                                              |
| <i>CG3358</i>                                                                      | Fly ortholog of TatD-related DNase TATDN1.                                                                                                                                                                                                                                         | (Yang et al. 2012)                                                                                |
| <i>CG12744</i>                                                                     | Zinc finger transcription factor.                                                                                                                                                                                                                                                  | (Jin et al. 2008)                                                                                 |
| <i>lola</i>                                                                        | Zinc finger transcription factor.                                                                                                                                                                                                                                                  | (Giniger et al. 1994)                                                                             |
| <i>Elba2</i>                                                                       | BEN domain-containing protein, associates with the <i>Fab-7</i> element.                                                                                                                                                                                                           | (Aoki et al. 2012)                                                                                |
| <i>Chd1</i>                                                                        | ATP-dependent nucleosome remodeling motor protein.                                                                                                                                                                                                                                 | (Konev et al. 2007)                                                                               |
| <i>c(2)M</i>                                                                       | Component of the synaptonemal complex.                                                                                                                                                                                                                                             | (Heidmann et al. 2004)                                                                            |
| <b>Small GTPase-mediated signal transduction (biological function), GO:0007264</b> |                                                                                                                                                                                                                                                                                    |                                                                                                   |
| <i>phyl</i>                                                                        | Regulator of Notch and Wnt signaling pathways.                                                                                                                                                                                                                                     | (Nagaraj and Banerjee 2009)                                                                       |
| <i>CG15611</i>                                                                     | Exhibits sequence similarity to fly Rho guanyl-nucleotide exchange factor TRIO.                                                                                                                                                                                                    | (Bateman et al. 2000)                                                                             |
| <i>CG8155</i>                                                                      | Structurally similar to fly Rab GTPase activator Evi5.                                                                                                                                                                                                                             | (Laflamme et al. 2012)                                                                            |
| <i>GEFmeso</i>                                                                     | Mesoderm guanine nucleotide exchange, a binding target of Ras-like GTPase Ral.                                                                                                                                                                                                     | (Blanke and Jackle 2006)                                                                          |
| <i>RtGEF</i>                                                                       | Homologous to mammalian Rho-type guanyl-nucleotide exchange factor Pix.                                                                                                                                                                                                            | (Manser et al. 1998)                                                                              |
| <i>Arf51F</i>                                                                      | GTP-binding protein according to sequence similarity to human ADP-ribosylation factor 2, Arf2.                                                                                                                                                                                     | (Bobak et al. 1989)                                                                               |
| <i>Sep5</i>                                                                        | Belongs to the superfamily of Septin GTPases.                                                                                                                                                                                                                                      | (O'Neill and Clark 2013)                                                                          |
| <b>Gametogenesis (biological function), GO:0048477, GO:0007283</b>                 |                                                                                                                                                                                                                                                                                    |                                                                                                   |
| <i>gbb</i>                                                                         | Fly ortholog of human bone morphogenic protein-5 (BMP-5); was shown to be involved in BMP signaling that controls ovarian cell development.                                                                                                                                        | (Kirilly et al. 2005)                                                                             |
| <i>vis</i>                                                                         | Transcription factor; required for regulation of multiple genes involved in sperm manufacture; mutants are male sterile due to a defect in primary                                                                                                                                 | (Ayyar et al. 2003)                                                                               |

|                                                                                                             |                                                                                                                                                                                                                                                                          |                                                                             |
|-------------------------------------------------------------------------------------------------------------|--------------------------------------------------------------------------------------------------------------------------------------------------------------------------------------------------------------------------------------------------------------------------|-----------------------------------------------------------------------------|
|                                                                                                             | spermatocyte differentiation before the onset of meiotic divisions.                                                                                                                                                                                                      |                                                                             |
| <i>TBCB</i>                                                                                                 | Tubulin-binding cofactor B, a ubiquitin-related domain-containing protein; regulates microtubule organization in the nucleus and controls oocyte polarity.                                                                                                               | (Baffet et al. 2012)                                                        |
| <i>AGO1</i>                                                                                                 | Plays central roles in female germ-line cell differentiation.                                                                                                                                                                                                            | (Yang et al. 2007)                                                          |
| <i>Arf51F</i>                                                                                               | ADP ribosylation factor; is required for cytokinesis in spermatocytes.                                                                                                                                                                                                   | (Dyer et al. 2007)                                                          |
| <i>stau</i>                                                                                                 | dsRNA- and mRNA 3'-UTR-binding protein; regulates translation and mRNA localization of egg polarity genes <i>bicoid</i> , <i>gurken</i> , <i>nanos</i> and <i>oskar</i> .                                                                                                | (Johnstone and Lasko 2001)                                                  |
| <i>Lar</i>                                                                                                  | Leukocyte antigen-related-like tyrosine phosphatase receptor protein; required for the establishment of cell polarity during oogenesis.                                                                                                                                  | (Krueger et al. 2003)                                                       |
| <i>Edtp</i>                                                                                                 | Egg-derived tyrosine phosphatase; essential for ovarian development, oogenesis and embryogenesis.                                                                                                                                                                        | (Yamaguchi et al. 2005)                                                     |
| <i>Socs36E</i>                                                                                              | Functions in male germ-line stem cell maintenance.                                                                                                                                                                                                                       | (Issigonis et al. 2009)<br>(Singh et al. 2010)                              |
| <i>pAbp</i>                                                                                                 | Polyadenylate-binding protein; essential for spermatid elongation; translationally regulates Grk ( <i>gurken</i> ), which is required for the establishment of the dorsal-ventral axis of a developing egg.                                                              | (Pertceva et al. 2010)<br>(Clouse et al. 2008)                              |
| <i>Chd1</i>                                                                                                 | SNF2-like ATPase; functions in oogenesis and egg fertilization.                                                                                                                                                                                                          | (Konev et al. 2007)<br>(McDaniel et al. 2008)                               |
| <b>Nervous system development and neural system processes (biological function), GO:0007399, GO:0050877</b> |                                                                                                                                                                                                                                                                          |                                                                             |
| <i>Dap160</i>                                                                                               | Dynamin-associated protein, contains EF-hand and SH3 domains, a negative regulator of Notch signaling; interacts with the atypical protein kinase C (aPKC) to stimulate neuroblast proliferation; similar to dynamin, regulates synaptic vesicle endocytosis.            | (Chabu and Doe 2008)<br>(Koh et al. 2004)                                   |
| <i>bsh</i>                                                                                                  | Transcription factor; regulates neuronal identity specification.                                                                                                                                                                                                         | (Hasegawa et al. 2013)                                                      |
| <i>phyl</i>                                                                                                 | Zinc-binding protein; essential for the peripheral nervous system development and photoreceptor differentiation.                                                                                                                                                         | (Chang et al. 1995)                                                         |
| <i>gbb</i>                                                                                                  | Part of the BMP signaling pathway; important for the neuromuscular junction development and synaptic transmission.                                                                                                                                                       | (James and Broihier 2011)                                                   |
| <i>CG5742</i>                                                                                               | Predicted ankyrin repeat-containing protein; was found to regulate neurogenesis in an RNAi screen in vivo in <i>Drosophila</i> .                                                                                                                                         | (Neumuller et al. 2011)                                                     |
| <i>inv</i>                                                                                                  | Transcription factor; regulates neuroblast fate determination.                                                                                                                                                                                                           | (Bhat and Schedl 1997)                                                      |
| <i>lea</i>                                                                                                  | Axon guidance receptor; regulates neuron migration.                                                                                                                                                                                                                      | (Simpson et al. 2000)<br>(Kraut and Zinn 2004)                              |
| <i>zf30C</i>                                                                                                | Transcription factor; regulates dendrite morphology in the developing brain.                                                                                                                                                                                             | (Parrish et al. 2006)                                                       |
| <i>spict</i>                                                                                                | Magnesium transmembrane transporter orthologous to human NIPA1; negatively regulates BMP signaling to promote synaptic growth at the neuromuscular junction.                                                                                                             | (Wang et al. 2007)                                                          |
| <i>Pka-R2</i>                                                                                               | cAMP-dependent protein kinase R2; functions in repulsive axon guidance.                                                                                                                                                                                                  | (Terman and Kolodkin 2004)                                                  |
| <i>spi</i>                                                                                                  | TGF- $\alpha$ -like ligand that triggers epidermal growth factor receptor (EGFR) activation to promote neuroepithelial proliferation and neuroblast formation in the optic lobe; as a component of EGFR signaling pathway, is important for olfactory learning in flies. | (Morante et al. 2013)<br>(Rahn et al. 2013)                                 |
| <i>RtGEF</i>                                                                                                | Rho-type guanine nucleotide exchange factor; regulates postsynaptic structure and protein localization at the glutaminergic neuromuscular junction.                                                                                                                      | (Parnas et al. 2001)                                                        |
| <i>uzip</i>                                                                                                 | Cell adhesion protein; functions in axon guidance in the <i>Drosophila</i> central nervous system.                                                                                                                                                                       | (Ding et al. 2011)                                                          |
| <i>Arf51F</i>                                                                                               | GTP-binding protein; has a regulatory function in synaptic vesicle endocytosis.                                                                                                                                                                                          | (Lloyd et al. 2000)                                                         |
| <i>stau</i>                                                                                                 | Regulator of translation, a major player in the establishment of long-term memory and neuronal plasticity.                                                                                                                                                               | (Dubnau et al. 2003)                                                        |
| <i>lola</i>                                                                                                 | Transcription factor; regulates axonogenesis, brain morphogenesis and eye development.                                                                                                                                                                                   | (Giniger et al. 1994)<br>(Yamamoto et al. 2008)<br>(Zheng and Carthew 2008) |

|                                                                      |                                                                                                                                               |                          |
|----------------------------------------------------------------------|-----------------------------------------------------------------------------------------------------------------------------------------------|--------------------------|
| <i>Lar</i>                                                           | Tyrosine phosphatase receptor; plays a key role in the control of axon guidance.                                                              | (Krueger et al. 1996)    |
| <i>E(Pc)</i>                                                         | Together with other subunits of the TIP60 HAT complex regulates dendrite targeting of olfactory neurons.                                      | (Tea and Luo 2011)       |
| <b>Stress response (biological function), GO:0006955, GO:0006952</b> |                                                                                                                                               |                          |
| <i>nopo</i>                                                          | E3 ligase; likely plays a role in defense response, based on its homology with human TRAF-interacting protein TRIP.                           | (Lee et al. 1997)        |
| <i>coro</i>                                                          | WD40 repeat-containing protein; belongs to a family of proteins involved in defense response to fungus.                                       | (Jin et al. 2008)        |
| <i>Gbp</i>                                                           | Growth blocking peptide; a potent cytokine that stimulates the expression of anti-microbial peptides.                                         | (Tsuzuki et al. 2012)    |
| <i>lola</i>                                                          | Transcription factor; functions in anti-microbial humoral response.                                                                           | (Kleino et al. 2005)     |
| <i>CG13551</i>                                                       | ATPase inhibitor, glycine-rich protein; has an in vitro activity in suppressing Gram-positive bacteria.                                       | (Feng et al. 2009)       |
| <i>dnr1</i>                                                          | FERM domain- and RING finger-containing protein; an inhibitor of the immune deficiency (IMD) pathway at the level of initiator caspase Dredd. | (Guntermann et al. 2009) |
| <i>Jhl-21</i>                                                        | Leucine transmembrane transporter; belongs to a family of proteins involved in defense response to fungus.                                    | (Jin et al. 2008)        |
| <i>Traf4</i>                                                         | TNF receptor-associated factor; functions in the IMD pathway and plays a role in fly defense response to <i>Vibrio cholera</i> .              | (Berkey et al. 2009)     |

The known attributes and properties of genetic suppressors and enhancers of *His1* function in vivo that belong to enriched GO term classes are listed.

Table S2 Overlap of transcripts regulated by CHD1, H1, HP1 and ISWI.

| SYMBOL/ TRANSCRIPT            | FLYBASE ID  | FOLD CHANGE |       |        |         |
|-------------------------------|-------------|-------------|-------|--------|---------|
|                               |             | <i>Chd1</i> | H1 KD | HP1 KD | ISWI KD |
| <b><i>Chd1</i> effect: UP</b> |             |             |       |        |         |
| <b>detoxification</b>         |             |             |       |        |         |
| <i>Gclc</i>                   | FBgn0040319 | 2.04        |       |        |         |
| <i>GstT4</i>                  | FBgn0030484 | 2.11        | 2.14  | 2.28   |         |
| <i>Cyp12b2</i>                | FBgn0034387 | 2.22        |       |        |         |
| <i>Cyp4ac3</i>                | FBgn0031695 | 2.25        | 29.44 |        |         |
| <i>Cyp18a1</i>                | FBgn0010383 | 2.28        |       |        |         |
| <i>Cyp28a5</i>                | FBgn0028940 | 2.30        | 2.27  |        |         |
| <i>Cyt-b5-r</i>               | FBgn0000406 | 2.57        | 10.17 |        | 0.393   |
| <i>GstD6</i>                  | FBgn0010042 | 2.68        | 13.24 |        |         |
| <i>CG4623</i>                 | FBgn0035587 | 3.16        |       |        |         |
| <i>Cyp9c1</i>                 | FBgn0015040 | 3.41        |       | 6.66   |         |
| <i>Cyp6a18</i>                | FBgn0039519 | 3.81        |       |        |         |
| <i>Ugt86Dj</i>                | FBgn0040250 | 3.92        |       |        |         |
| <i>Cyp9h1</i>                 | FBgn0033775 | 4.06        |       |        |         |
| <i>GstE6</i>                  | FBgn0063494 | 4.17        | 43.50 | 2.95   |         |
| <i>Cyp313a3</i>               | FBgn0038007 | 5.03        |       |        |         |
| <i>Cyp6a9</i>                 | FBgn0013771 | 5.28        | 2.30  |        |         |
| <i>Cyp4d8</i>                 | FBgn0015033 | 5.74        | 2.40  |        |         |
| <i>Cyp6a23</i>                | FBgn0033978 | 5.98        | 16.25 |        | 3.07    |
| <i>GstE7</i>                  | FBgn0063493 | 8.94        |       | 3.78   |         |
| <i>GstE5</i>                  | FBgn0063495 | 12.3        | 29.07 |        |         |
| <i>Cyp6a2</i>                 | FBgn0000473 | 30.5        |       | 2.21   |         |
| <i>Cyp4p2</i>                 | FBgn0033395 | 40.2        | 4.52  |        |         |
| <i>Cyp4e3</i>                 | FBgn0015035 | 73.0        | 7.07  |        |         |
| <b>development</b>            |             |             |       |        |         |
| <i>Iris</i>                   | FBgn0031305 | 2.00        |       |        |         |
| <i>ldgf3</i>                  | FBgn0020414 | 2.00        | 3.07  |        |         |
| <i>hts</i>                    | FBgn0263391 | 2.04        |       |        |         |
| <i>CG13461</i>                | FBgn0036468 | 2.14        | 5.69  |        |         |
| <i>Rbp9</i>                   | FBgn0010263 | 2.23        | 2.02  |        |         |
| <i>rad50</i>                  | FBgn0034728 | 2.27        | 7.96  |        |         |
| <i>PH4alphaSG2</i>            | FBgn0039779 | 2.35        |       |        |         |
| <i>mbl</i>                    | FBgn0265487 | 2.45        |       |        |         |
| CR_TC_RE65113                 |             | 2.51        |       |        |         |
| <i>CG42390</i>                | FBgn0259736 | 2.51        | 0.464 |        | 2.48    |
| <i>CG15784</i>                | FBgn0029766 | 2.68        | 3.42  |        |         |
| <i>Npc1b</i>                  | FBgn0261675 | 2.77        |       |        |         |
| <i>bol</i>                    | FBgn0011206 | 2.91        |       |        |         |
| <i>Glycogenin</i>             | FBgn0265191 | 2.95        |       |        |         |
| <i>lola</i>                   | FBgn0005630 | 3.12        |       |        |         |
| <i>CG14265</i>                | FBgn0040393 | 3.36        |       |        |         |
| <i>chinmo</i>                 | FBgn0086758 | 3.46        |       |        |         |
| <i>ine</i>                    | FBgn0011603 | 3.51        | 0.062 |        |         |
| <i>sens</i>                   | FBgn0002573 | 3.58        |       |        |         |
| <i>Atf3</i>                   | FBgn0028550 | 3.81        |       |        |         |
| <i>Jhl-26</i>                 | FBgn0028424 | 3.84        | 7.00  | 2.68   |         |
| <i>metro</i>                  | FBgn0050021 | 3.86        | 0.084 |        |         |

|                        |             |             |               |             |              |
|------------------------|-------------|-------------|---------------|-------------|--------------|
| <i>CG5867</i>          | FBgn0027586 | <b>3.97</b> |               |             |              |
| <i>Est-Q</i>           | FBgn0037090 | <b>4.06</b> | <b>5.17</b>   |             |              |
| <i>Ftz-f1</i>          | FBcl0153222 | <b>4.06</b> |               |             |              |
| <i>Dh44-R2</i>         | FBgn0033744 | <b>4.23</b> | <b>2.33</b>   |             |              |
| <i>chinmo</i>          | FBgn0086758 | <b>4.35</b> |               |             |              |
| <i>CG10918</i>         | FBgn0031178 | <b>4.76</b> |               |             |              |
| <i>smp-30</i>          | FBgn0038257 | <b>4.76</b> | <b>19.82</b>  |             |              |
| <i>tx</i>              | FBgn0263118 | <b>4.86</b> |               |             |              |
| <i>fru</i>             | FBgn0004652 | <b>5.13</b> | <b>2.85</b>   |             |              |
| <i>smp-30</i>          | FBgn0038257 | <b>5.46</b> | <b>19.82</b>  |             |              |
| <i>CG32694</i>         | FBgn0052694 | <b>5.54</b> |               |             |              |
| <i>Msp300</i>          | FBgn0261836 | <b>5.74</b> |               |             |              |
| <i>lcs</i>             | FBgn0028583 | <b>6.87</b> |               |             |              |
| <i>LP09368</i>         | FBcl0192001 | <b>7.94</b> |               |             |              |
| <i>CG32071</i>         | FBgn0052071 | <b>8.17</b> |               |             |              |
| <i>CG42368</i>         | FBgn0259714 | <b>42.2</b> | <b>0.471</b>  |             |              |
| <i>CG16898</i>         | FBgn0034480 | <b>69.1</b> | <b>6.66</b>   |             |              |
| <i>l(2)efl</i>         | FBgn0011296 | <b>85.6</b> |               |             |              |
| <b>immune response</b> |             |             |               |             |              |
| <i>kek5</i>            | FBgn0031016 | <b>2.01</b> |               |             |              |
| <i>Ect4</i>            | FBgn0262579 | <b>2.06</b> |               | <b>2.17</b> |              |
| <i>SPE</i>             | FBgn0039102 | <b>2.19</b> | <b>4.83</b>   |             |              |
| <i>Tsp42Eh</i>         | FBgn0033129 | <b>2.20</b> |               |             |              |
| <i>Sr-CI</i>           | FBgn0014033 | <b>2.46</b> | <b>4.37</b>   |             |              |
| <i>CG8562</i>          | FBgn0035779 | <b>2.57</b> |               |             |              |
| <i>dl</i>              | FBgn0260632 | <b>2.57</b> |               |             |              |
| <i>ea</i>              | FBgn0000533 | <b>2.60</b> |               |             |              |
| <i>Tsp42Eg</i>         | FBgn0033128 | <b>2.62</b> |               |             |              |
| <i>ninaD</i>           | FBgn0002939 | <b>2.71</b> |               |             |              |
| <i>PebIII</i>          | FBgn0011695 | <b>2.85</b> |               |             |              |
| <i>Phae2</i>           | FBgn0263235 | <b>2.85</b> |               |             |              |
| <i>alpha-Est2</i>      | FBgn0015570 | <b>2.85</b> | <b>2.17</b>   |             |              |
| <i>TBCB</i>            | FBgn0034451 | <b>2.97</b> |               |             |              |
| <i>CG10433</i>         | FBgn0034638 | <b>3.05</b> | <b>3.25</b>   |             | <b>0.487</b> |
| <i>CG5597</i>          | FBgn0034920 | <b>3.07</b> |               |             |              |
| <i>Ect4</i>            | FBgn0262579 | <b>3.12</b> |               | <b>2.17</b> |              |
| <i>NimB1</i>           | FBgn0027929 | <b>3.18</b> |               |             |              |
| <i>CG15255</i>         | FBgn0028950 | <b>3.46</b> |               |             |              |
| <i>NimC1</i>           | FBgn0259896 | <b>3.51</b> |               |             |              |
| <i>CG3775</i>          | FBgn0030425 | <b>3.53</b> |               |             |              |
| <i>CG5791</i>          | FBgn0040582 | <b>3.58</b> |               |             |              |
| <i>Ser6</i>            | FBgn0011834 | <b>3.78</b> |               |             |              |
| <i>CG13947</i>         | FBgn0031277 | <b>4.14</b> | <b>2.26</b>   |             |              |
| <i>CG7248</i>          | FBgn0036229 | <b>4.23</b> |               |             |              |
| <i>CG5550</i>          | FBgn0034160 | <b>4.38</b> |               |             |              |
| <i>PGRP-SC1b</i>       | FBgn0033327 | <b>4.47</b> |               |             |              |
| <i>CG15293</i>         | FBgn0028526 | <b>4.50</b> | <b>5.16</b>   |             |              |
| <i>CG8620</i>          | FBgn0040837 | <b>4.89</b> | <b>160.83</b> |             |              |
| <i>mthl8</i>           | FBgn0052475 | <b>4.99</b> | <b>3.29</b>   |             |              |
| <i>CG17974</i>         | FBgn0034624 | <b>5.46</b> |               |             |              |
| <i>spherioide</i>      | FBgn0030774 | <b>5.74</b> |               |             |              |
| <i>CG13324</i>         | FBgn0033789 | <b>5.78</b> |               |             |              |

|                                |             |             |              |             |             |
|--------------------------------|-------------|-------------|--------------|-------------|-------------|
| <i>CG9928</i>                  | FBgn0032472 | <b>5.86</b> | <b>19.55</b> |             |             |
| <i>TotC</i>                    | FBgn0044812 | <b>6.15</b> | <b>58.64</b> |             |             |
| <i>CG18179</i>                 | FBgn0036023 | <b>6.32</b> |              |             |             |
| <i>Muc68Ca</i>                 | FBgn0036181 | <b>7.36</b> |              |             | <b>2.07</b> |
| <i>CG33178</i>                 | FBgn0053178 | <b>7.36</b> |              |             |             |
| <i>CG5778</i>                  | FBgn0038930 | <b>7.57</b> | <b>27.36</b> |             |             |
| <i>Fmo-2</i>                   | FBgn0033079 | <b>9.00</b> | <b>9.77</b>  |             |             |
| <i>CG14419</i>                 | FBgn0029639 | <b>12.1</b> |              |             |             |
| <i>CG16775</i>                 | FBgn0036767 | <b>13.9</b> |              |             |             |
| <i>Prx2540-2</i>               | FBgn0033518 | <b>27.1</b> | <b>0.483</b> |             |             |
| <i>Mdr50</i>                   | FBgn0010241 | <b>54.6</b> |              |             |             |
| <b>intracellular processes</b> |             |             |              |             |             |
| <i>larp</i>                    | FBgn0261618 | <b>2.01</b> |              |             |             |
| <i>Sec31</i>                   | FBgn0033339 | <b>2.01</b> | <b>0.483</b> |             |             |
| <i>dm</i>                      | FBgn0262656 | <b>2.03</b> |              |             |             |
| <i>stau</i>                    | FBgn0003520 | <b>2.06</b> |              |             |             |
| <i>mTTF</i>                    | FBgn0028530 | <b>2.10</b> |              |             |             |
| <i>qlss</i>                    | FBgn0051005 | <b>2.10</b> |              |             |             |
| <i>Ndae1</i>                   | FBgn0259111 | <b>2.10</b> | <b>0.357</b> | <b>4.82</b> |             |
| <i>Nf1</i>                     | FBgn0015269 | <b>2.14</b> |              |             |             |
| <i>CG8503</i>                  | FBgn0033917 | <b>2.23</b> |              |             |             |
| <i>form3</i>                   | FBgn0053556 | <b>2.28</b> |              |             |             |
| <i>Msp300</i>                  | FBgn0261836 | <b>2.38</b> |              |             |             |
| <i>CG5599</i>                  | FBgn0030612 | <b>2.41</b> |              |             |             |
| <i>mbl</i>                     | FBgn0265487 | <b>2.53</b> |              |             |             |
| <i>CG2681</i>                  | FBgn0024997 | <b>2.68</b> |              |             |             |
| <i>Irbp</i>                    | FBgn0011774 | <b>2.71</b> | <b>14.23</b> |             |             |
| <i>CG3328</i>                  | FBgn0034985 | <b>2.75</b> |              |             |             |
| <i>GluRIIC</i>                 | FBgn0046113 | <b>2.75</b> |              |             |             |
| <i>phr</i>                     | FBgn0003082 | <b>2.79</b> |              |             |             |
| <i>Obp56a</i>                  | FBgn0034468 | <b>2.79</b> |              |             |             |
| <i>CG5205</i>                  | FBgn0038344 | <b>2.89</b> | <b>2.44</b>  |             |             |
| <i>CG44085</i>                 | FBgn0264894 | <b>2.91</b> |              |             |             |
| <i>Diver</i>                   |             | <b>3.03</b> | <b>3.62</b>  |             |             |
| <i>CG30118</i>                 | FBgn0050118 | <b>3.03</b> | <b>2.00</b>  |             |             |
| <i>CG6503</i>                  | FBgn0040606 | <b>3.05</b> | <b>10.18</b> |             |             |
| <i>ng3</i>                     | FBgn0010295 | <b>3.05</b> |              |             |             |
| <i>zormin</i>                  | FBgn0052311 | <b>3.34</b> | <b>0.456</b> |             |             |
| <i>ps</i>                      | FBgn0261552 | <b>3.34</b> |              |             |             |
| <i>Skeletor</i>                | FBgn0262717 | <b>3.48</b> |              |             |             |
| <i>CG14661</i>                 | FBgn0037288 | <b>3.68</b> |              |             |             |
| <i>CG6910</i>                  | FBgn0036262 | <b>3.73</b> | <b>2.65</b>  |             |             |
| <i>CG12863</i>                 | FBgn0033948 | <b>3.78</b> |              |             |             |
| <i>CG30285</i>                 | FBgn0050285 | <b>4.35</b> | <b>4.04</b>  |             |             |
| <i>CG44013</i>                 | FBgn0264775 | <b>4.89</b> |              |             |             |
| <i>Ude</i>                     | FBgn0039226 | <b>5.03</b> |              |             | <b>3.85</b> |
| <i>CG2120</i>                  | FBgn0030005 | <b>5.28</b> |              |             |             |
| <i>CG44013</i>                 | FBgn0264775 | <b>5.46</b> |              |             |             |
| <i>tobi</i>                    | FBgn0261575 | <b>5.94</b> |              |             |             |
| <i>CG6839</i>                  | FBgn0036831 | <b>6.06</b> |              |             |             |
| <i>CG7299</i>                  | FBgn0032282 | <b>6.63</b> |              |             |             |
| <i>CG11659</i>                 | FBgn0038731 | <b>7.21</b> |              |             |             |

|                    |             |             |              |             |             |
|--------------------|-------------|-------------|--------------|-------------|-------------|
| <i>CG5070</i>      | FBgn0030824 | <b>8.69</b> |              |             |             |
| <i>CG9757</i>      | FBgn0003060 | <b>16.8</b> |              |             |             |
| <b>metabolism</b>  |             |             |              |             |             |
| <i>CG30427</i>     | FBgn0043792 | <b>2.00</b> |              |             |             |
| <i>CG7149</i>      | FBgn0031948 | <b>2.00</b> |              |             |             |
| <i>Evi5</i>        | FBgn0262740 | <b>2.01</b> |              |             |             |
| <i>CG3902</i>      | FBgn0036824 | <b>2.03</b> |              |             |             |
| <i>CG11453</i>     | FBgn0038734 | <b>2.04</b> |              |             |             |
| <i>CG15534</i>     | FBgn0039769 | <b>2.11</b> |              |             |             |
| <i>Marf</i>        | FBgn0029870 | <b>2.11</b> |              |             |             |
| <i>CG40486</i>     | FBgn0263830 | <b>2.13</b> |              |             |             |
| <i>Unc-115b</i>    | FBgn0260463 | <b>2.14</b> |              |             |             |
| <i>CG9674</i>      | FBgn0036663 | <b>2.16</b> |              |             |             |
| <i>CG3523</i>      | FBgn0027571 | <b>2.16</b> | <b>2.37</b>  |             |             |
| <i>CG6733</i>      | FBgn0039052 | <b>2.16</b> |              |             |             |
| <i>su(r)</i>       | FBgn0086450 | <b>2.17</b> | <b>3.20</b>  | <b>2.45</b> |             |
| <i>Men</i>         | FBgn0002719 | <b>2.20</b> | <b>4.11</b>  |             |             |
| <i>Amy-p</i>       | FBgn0000079 | <b>2.20</b> |              |             |             |
| <i>alpha-Est10</i> | FBgn0015569 | <b>2.22</b> | <b>3.40</b>  |             |             |
| <i>CG43340</i>     | FBgn0263077 | <b>2.22</b> |              | <b>3.00</b> |             |
| <i>CG32645</i>     | FBgn0052645 | <b>2.22</b> |              |             |             |
| <i>pgant4</i>      | FBgn0051956 | <b>2.22</b> |              |             |             |
| <i>CG17322</i>     | FBgn0027070 | <b>2.22</b> |              |             |             |
| <i>CG31475</i>     | FBgn0051475 | <b>2.23</b> |              |             |             |
| <i>AdSS</i>        | FBgn0027493 | <b>2.23</b> | <b>2.01</b>  |             |             |
| <i>GstZ2</i>       | FBgn0037697 | <b>2.25</b> |              |             |             |
| <i>nemy</i>        | FBgn0261673 | <b>2.27</b> |              |             |             |
| <i>Ugt86Da</i>     | FBgn0040259 | <b>2.28</b> | <b>8.97</b>  | <b>2.71</b> |             |
| <i>CAHbeta</i>     | FBgn0037646 | <b>2.30</b> |              |             |             |
| <i>CG7920</i>      | FBgn0039737 | <b>2.30</b> |              |             |             |
| <i>Pepck</i>       | FBgn0003067 | <b>2.30</b> |              | <b>4.99</b> | <b>2.84</b> |
| <i>Spat</i>        | FBgn0014031 | <b>2.31</b> | <b>2.38</b>  |             |             |
| <i>Mocs1</i>       | FBgn0263241 | <b>2.31</b> |              |             |             |
| <i>CG32649</i>     | FBgn0052649 | <b>2.31</b> |              |             |             |
| <i>Pkc53E</i>      | FBgn0003091 | <b>2.33</b> | <b>0.340</b> |             |             |
| <i>CG14655</i>     | FBgn0037275 | <b>2.33</b> |              |             |             |
| <i>CG13397</i>     | FBgn0014417 | <b>2.33</b> |              |             |             |
| <i>CG8129</i>      | FBgn0037684 | <b>2.35</b> | <b>2.00</b>  |             |             |
| <i>Ac78C</i>       | FBgn0024150 | <b>2.38</b> |              |             |             |
| <i>Kua</i>         | FBgn0032850 | <b>2.38</b> |              |             |             |
| <i>Ca-P60A</i>     | FBgn0263006 | <b>2.43</b> |              |             |             |
| <i>CG11162</i>     | FBgn0030509 | <b>2.43</b> |              |             |             |
| <i>CG32557</i>     | FBgn0052557 | <b>2.46</b> |              |             |             |
| <i>Uro</i>         | FBgn0003961 | <b>2.48</b> | <b>2.13</b>  |             |             |
| <i>CG3597</i>      | FBgn0031417 | <b>2.48</b> | <b>2.08</b>  |             |             |
| <i>CG3301</i>      | FBgn0038878 | <b>2.48</b> | <b>0.448</b> |             |             |
| <i>Aldh</i>        | FBgn0012036 | <b>2.48</b> | <b>2.56</b>  |             |             |
| <i>CG5704</i>      | FBgn0026570 | <b>2.50</b> | <b>2.10</b>  |             |             |
| <i>CG1315</i>      | FBgn0026565 | <b>2.51</b> |              |             |             |
| <i>Ugt35a</i>      | FBgn0026315 | <b>2.53</b> | <b>3.35</b>  | <b>2.47</b> |             |
| <i>drd</i>         | FBgn0260006 | <b>2.55</b> |              |             |             |
| <i>ACC</i>         | FBgn0033246 | <b>2.57</b> | <b>7.19</b>  |             |             |



|                   |             |             |              |             |              |
|-------------------|-------------|-------------|--------------|-------------|--------------|
| <i>Tdc1</i>       | FBgn0259977 | <b>2.57</b> |              |             |              |
| <i>CG1673</i>     | FBgn0030482 | <b>2.58</b> |              |             |              |
| <i>AOX1</i>       | FBgn0267408 | <b>2.60</b> |              |             |              |
| <i>Gpdh</i>       | FBgn0001128 | <b>2.62</b> | <b>2.22</b>  |             |              |
| <i>CG1774</i>     | FBgn0039856 | <b>2.64</b> |              |             |              |
| <i>CG10175</i>    | FBgn0039084 | <b>2.66</b> | <b>0.481</b> |             |              |
| <i>Jheh3</i>      | FBgn0034406 | <b>2.68</b> |              | <b>6.01</b> |              |
| <i>CG10827</i>    | FBgn0038845 | <b>2.68</b> |              |             |              |
| <i>Gad1</i>       | FBgn0004516 | <b>2.73</b> |              |             |              |
| <i>Est-6</i>      | FBgn0000592 | <b>2.77</b> | <b>7.32</b>  |             |              |
| <i>CG33093</i>    | FBgn0053093 | <b>2.79</b> | <b>7.39</b>  |             |              |
| <i>CG6074</i>     | FBgn0039486 | <b>2.79</b> | <b>23.77</b> |             |              |
| <i>Tie</i>        | FBgn0014073 | <b>2.81</b> | <b>0.205</b> |             |              |
| <i>CG8128</i>     | FBgn0030668 | <b>2.83</b> |              |             |              |
| <i>alpha-Est8</i> | FBgn0015576 | <b>2.83</b> |              |             | <b>0.374</b> |
| <i>CG5707</i>     | FBgn0026593 | <b>2.87</b> |              |             |              |
| <i>CG13311</i>    | FBgn0035929 | <b>2.89</b> |              |             |              |
| <i>Obp56e</i>     | FBgn0034471 | <b>2.89</b> |              |             |              |
| <i>l(1)G0196</i>  | FBgn0027279 | <b>2.89</b> |              |             |              |
| <i>CG14787</i>    | FBgn0027793 | <b>2.91</b> |              |             | <b>17.33</b> |
| <i>CG3841</i>     | FBgn0032131 | <b>2.95</b> |              |             |              |
| <i>CG9993</i>     | FBgn0034553 | <b>2.97</b> |              |             |              |
| <i>sls</i>        | FBgn0086906 | <b>3.10</b> | <b>0.081</b> |             |              |
| <i>CG30503</i>    | FBgn0050503 | <b>3.14</b> | <b>0.392</b> |             | <b>2.60</b>  |
| <i>CG14762</i>    | FBgn0033250 | <b>3.16</b> | <b>33.48</b> |             |              |
| <i>CG10165</i>    | FBgn0032801 | <b>3.16</b> | <b>3.66</b>  |             |              |
| <i>Gbs-76A</i>    | FBgn0036862 | <b>3.18</b> |              |             |              |
| <i>Ugt86Dh</i>    | FBgn0040252 | <b>3.29</b> |              |             |              |
| <i>CG7025</i>     | FBgn0031930 | <b>3.29</b> |              |             |              |
| <i>Cyp18a1</i>    | FBgn0010383 | <b>3.32</b> |              |             |              |
| <i>Npc2h</i>      | FBgn0039801 | <b>3.32</b> | <b>5.23</b>  |             |              |
| <i>Gpo-1</i>      | FBgn0022160 | <b>3.32</b> | <b>3.37</b>  |             | <b>0.493</b> |
| <i>RluA-1</i>     | FBgn0051719 | <b>3.34</b> |              |             |              |
| <i>Ork1</i>       | FBgn0017561 | <b>3.36</b> | <b>11.63</b> |             |              |
| <i>Mipp1</i>      | FBgn0026061 | <b>3.36</b> | <b>4.33</b>  |             |              |
| <i>CG15879</i>    | FBgn0035309 | <b>3.39</b> |              |             |              |
| <i>CG42329</i>    | FBgn0259229 | <b>3.41</b> | <b>3.51</b>  |             |              |
| <i>CG9466</i>     | FBgn0032068 | <b>3.48</b> |              |             |              |
| <i>CG8708</i>     | FBgn0033271 | <b>3.58</b> | <b>3.21</b>  |             |              |
| <i>CG3835</i>     | FBgn0023507 | <b>3.58</b> | <b>3.69</b>  |             |              |
| <i>sls</i>        | FBgn0086906 | <b>3.63</b> | <b>0.081</b> |             |              |
| <i>fa2h</i>       | FBgn0050502 | <b>3.66</b> |              |             |              |
| <i>CG1461</i>     | FBgn0030558 | <b>3.66</b> |              |             |              |
| <i>CG8629</i>     | FBgn0035742 | <b>3.89</b> |              |             |              |
| <i>CG10592</i>    | FBgn0035619 | <b>3.97</b> |              |             |              |
| <i>CG15117</i>    | FBgn0034417 | <b>4.06</b> |              |             |              |
| <i>CG32170</i>    | FBgn0052170 | <b>4.06</b> |              |             |              |
| <i>Unc-89</i>     | FBgn0053519 | <b>4.06</b> |              |             |              |
| <i>St3</i>        | FBgn0265052 | <b>4.08</b> |              |             |              |
| <i>Gpdh</i>       | FBgn0001128 | <b>4.29</b> | <b>2.22</b>  |             |              |
| <i>Mlc2</i>       | FBgn0002773 | <b>4.29</b> | <b>2.31</b>  |             |              |
| <i>arg</i>        | FBgn0023535 | <b>4.35</b> | <b>5.01</b>  |             |              |

|                    |             |      |       |      |      |
|--------------------|-------------|------|-------|------|------|
| <i>CS-2</i>        | FBgn0029091 | 4.50 |       |      |      |
| <i>CG17843</i>     | FBgn0038919 | 4.50 |       |      |      |
| <i>AOX2</i>        | FBgn0038348 | 4.69 |       |      |      |
| <i>glob1</i>       | FBgn0027657 | 4.72 | 6.42  |      |      |
| <i>CG30457</i>     | FBgn0050457 | 4.79 |       |      |      |
| <i>CG9743</i>      | FBgn0039756 | 5.10 | 2.17  |      |      |
| <i>CG32751</i>     | FBgn0052751 | 5.13 |       |      |      |
| <i>CG9468</i>      | FBgn0032069 | 5.13 |       |      |      |
| <i>CG4753</i>      | FBgn0036622 | 5.13 | 8.81  |      |      |
| <i>CG42249</i>     | FBgn0259101 | 5.28 |       |      |      |
| <i>CG12512</i>     | FBgn0031703 | 5.31 | 11.53 |      |      |
| <i>Apoltp</i>      | FBgn0032136 | 5.70 | 2.89  | 2.39 | 2.22 |
| <i>CG5150</i>      | FBgn0035620 | 6.28 |       |      |      |
| <i>vanin-like</i>  | FBgn0040069 | 7.57 |       |      |      |
| <i>CG8630</i>      | FBgn0038130 | 8.22 |       |      |      |
| <i>CG3106</i>      | FBgn0030148 | 8.63 |       |      |      |
| <i>CG14022</i>     | FBgn0031700 | 8.69 |       |      |      |
| <i>Odc2</i>        | FBgn0013308 | 9.45 |       |      |      |
| <i>CG14205</i>     | FBgn0031034 | 13.4 |       |      |      |
| <i>frac</i>        | FBgn0035798 | 20.3 |       |      |      |
| <i>Jhedup</i>      | FBgn0034076 | 21.3 |       |      |      |
| <i>CG11796</i>     | FBgn0036992 | 22.9 |       |      |      |
| <i>hgo</i>         | FBgn0040211 | 23.4 |       |      |      |
| <i>CG4716</i>      | FBgn0033820 | 32.0 | 11.77 |      |      |
| <i>CG4716</i>      | FBgn0033820 | 61.8 | 11.77 |      |      |
| <i>CG4757</i>      | FBgn0027584 | 190  | 5.27  |      |      |
| <b>proteolysis</b> |             |      |       |      |      |
| <i>CG9505</i>      | FBgn0031805 | 2.00 | 2.72  |      |      |
| <i>CG18417</i>     | FBgn0035780 | 2.01 |       |      |      |
| <i>CG31821</i>     | FBgn0051821 | 2.08 |       |      |      |
| <i>Try29F</i>      | FBgn0015316 | 2.10 | 2.28  |      |      |
| <i>CG18493</i>     | FBgn0038701 | 2.14 |       |      |      |
| <i>CG4721</i>      | FBgn0039024 | 2.14 | 2.82  |      |      |
| <i>CG17739</i>     | FBgn0033710 | 2.14 |       |      |      |
| <i>CG4725</i>      | FBgn0039022 | 2.20 |       |      |      |
| <i>Kaz-m1</i>      | FBgn0002578 | 2.30 |       |      |      |
| <i>l(2)34Fc</i>    | FBgn0261534 | 2.33 |       |      |      |
| <i>scaf</i>        | FBgn0033033 | 2.33 |       |      |      |
| <i>CG6225</i>      | FBgn0038072 | 2.38 |       |      |      |
| <i>CG16712</i>     | FBgn0031561 | 2.48 | 7.20  | 2.68 |      |
| <i>Bace</i>        | FBgn0032049 | 2.48 |       |      |      |
| <i>iotaTry</i>     | FBgn0015001 | 2.50 |       |      |      |
| <i>stv</i>         | FBgn0086708 | 2.53 |       | 4.30 |      |
| <i>CG17477</i>     | FBgn0038479 | 2.58 |       |      |      |
| <i>CG30043</i>     | FBgn0050043 | 2.66 |       |      |      |
| <i>CG6337</i>      | FBgn0033873 | 2.71 |       |      |      |
| <i>CG32483</i>     | FBgn0052483 | 2.77 |       |      | 7.18 |
| <i>CG6048</i>      | FBgn0029827 | 2.87 |       |      |      |
| <i>CG5246</i>      | FBgn0038484 | 2.91 |       |      |      |
| <i>CG3604</i>      | FBgn0031562 | 2.91 | 3.70  |      |      |
| <i>zetaTry</i>     | FBgn0011556 | 2.99 |       |      |      |
| <i>Nep1</i>        | FBgn0029843 | 3.03 |       |      |      |

|                         |             |             |              |              |             |
|-------------------------|-------------|-------------|--------------|--------------|-------------|
| <i>CG4053</i>           | FBgn0038482 | <b>3.10</b> |              |              |             |
| <i>CG10472</i>          | FBgn0035670 | <b>3.16</b> |              |              |             |
| <i>CG11961</i>          | FBgn0034436 | <b>3.25</b> |              |              |             |
| <i>CG17475</i>          | FBgn0038481 | <b>3.25</b> |              |              |             |
| <i>CG13160</i>          | FBgn0033720 | <b>3.41</b> |              |              |             |
| <i>CG17134</i>          | FBgn0032304 | <b>3.43</b> |              |              |             |
| <i>CG10051</i>          | FBgn0034437 | <b>3.81</b> |              |              |             |
| <i>CG33127</i>          | FBgn0053127 | <b>3.84</b> |              |              |             |
| <i>CG33459</i>          | FBgn0053459 | <b>3.86</b> | <b>10.43</b> |              |             |
| <i>CG30371</i>          | FBgn0050371 | <b>4.08</b> | <b>0.160</b> |              |             |
| <i>CG31233</i>          | FBgn0051233 | <b>4.14</b> |              |              |             |
| <i>kappaTry</i>         | FBgn0043471 | <b>4.38</b> |              |              |             |
| <i>CG4653</i>           | FBgn0030776 | <b>4.41</b> |              |              |             |
| <i>CG31343</i>          | FBgn0051343 | <b>4.41</b> | <b>12.63</b> |              |             |
| <i>lambdaTry</i>        | FBgn0043470 | <b>4.47</b> |              |              |             |
| <i>Sp212</i>            | FBgn0053329 | <b>4.82</b> |              |              |             |
| <i>CG1304</i>           | FBgn0031141 | <b>5.35</b> |              |              |             |
| <i>CG3513</i>           | FBgn0031559 | <b>5.35</b> | <b>11.02</b> |              |             |
| <i>CG31198</i>          | FBgn0051198 | <b>5.58</b> |              |              |             |
| <i>CG8774</i>           | FBgn0038136 | <b>7.73</b> |              |              |             |
| <i>Spn47C</i>           | FBgn0033574 | <b>7.73</b> |              |              |             |
| <i>CG14820</i>          | FBgn0035718 | <b>8.00</b> |              |              |             |
| <i>CG31265</i>          | FBgn0051265 | <b>9.06</b> |              |              |             |
| <i>CG15254</i>          | FBgn0028949 | <b>14.7</b> |              |              |             |
| <b>signaling</b>        |             |             |              |              |             |
| <i>PKD</i>              | FBgn0038603 | <b>2.04</b> |              | <b>4.00</b>  |             |
| <i>moody</i>            | FBgn0025631 | <b>2.06</b> | <b>2.28</b>  |              |             |
| <i>Syn</i>              | FBgn0004575 | <b>2.07</b> | <b>2.44</b>  |              |             |
| <i>Fas2</i>             | FBgn0000635 | <b>2.11</b> |              | <b>0.479</b> |             |
| <i>mthl6</i>            | FBgn0035789 | <b>2.14</b> |              |              |             |
| <i>CrzR</i>             | FBgn0036278 | <b>2.16</b> |              |              |             |
| <i>Ag5r</i>             | FBgn0015010 | <b>2.19</b> | <b>6.17</b>  |              |             |
| <i>Tk</i>               | FBgn0037976 | <b>2.22</b> |              |              |             |
| <i>Galphaf</i>          | FBgn0010223 | <b>2.30</b> | <b>6.31</b>  |              |             |
| <i>Amph</i>             | FBgn0027356 | <b>2.35</b> |              |              |             |
| <i>Dh31-R</i>           | FBgn0052843 | <b>2.50</b> |              |              |             |
| <i>CG12290</i>          | FBgn0039419 | <b>2.57</b> |              |              |             |
| <i>CG7054</i>           | FBgn0038972 | <b>2.66</b> | <b>3.91</b>  |              |             |
| <i>Pkcdelta</i>         | FBgn0259680 | <b>2.71</b> |              |              |             |
| <i>CG15529</i>          | FBgn0039748 | <b>2.83</b> |              |              |             |
| <i>Mctp</i>             | FBgn0034389 | <b>2.95</b> | <b>0.300</b> | <b>2.11</b>  | <b>2.25</b> |
| <i>Pde6</i>             | FBgn0038237 | <b>2.95</b> | <b>5.21</b>  |              |             |
| <i>CG5402</i>           | FBgn0039521 | <b>3.39</b> |              |              |             |
| <i>Ac76E</i>            | FBgn0004852 | <b>3.43</b> |              |              |             |
| <i>CG8907</i>           | FBgn0038466 | <b>3.48</b> | <b>2.81</b>  |              |             |
| <i>CG9498</i>           | FBgn0031801 | <b>4.56</b> | <b>3.62</b>  |              |             |
| <i>RyR</i>              | FBgn0011286 | <b>8.88</b> |              |              |             |
| <b>tissue structure</b> |             |             |              |              |             |
| <i>CAP</i>              | FBgn0033504 | <b>2.03</b> | <b>2.32</b>  |              |             |
| <i>Ag5r2</i>            | FBgn0020508 | <b>2.03</b> |              |              |             |
| <i>Cpr97Eb</i>          | FBgn0039481 | <b>2.04</b> |              |              |             |
| <i>LamC</i>             | FBgn0010397 | <b>2.08</b> |              |              | <b>2.95</b> |

|                    |             |             |              |             |  |
|--------------------|-------------|-------------|--------------|-------------|--|
| <i>CG8927</i>      | FBgn0038405 | <b>2.08</b> |              |             |  |
| <i>ldgf5</i>       | FBgn0064237 | <b>2.11</b> | <b>2.30</b>  |             |  |
| <i>Lcp65Af</i>     | FBgn0020639 | <b>2.14</b> |              |             |  |
| <i>CG14304</i>     | FBgn0038629 | <b>2.16</b> |              |             |  |
| <i>CG7298</i>      | FBgn0036948 | <b>2.17</b> |              |             |  |
| <i>kst</i>         | FBgn0004167 | <b>2.19</b> |              |             |  |
| <i>Acp1</i>        | FBgn0014454 | <b>2.25</b> |              |             |  |
| <i>Cht7</i>        | FBgn0035398 | <b>2.27</b> | <b>0.194</b> |             |  |
| <i>verm</i>        | FBgn0261341 | <b>2.28</b> |              |             |  |
| <i>Cpr11B</i>      | FBgn0030398 | <b>2.30</b> |              |             |  |
| <i>Cda5</i>        | FBgn0051973 | <b>2.33</b> | <b>0.109</b> |             |  |
| <i>obst-I</i>      | FBgn0052304 | <b>2.33</b> |              |             |  |
| <i>Cht6</i>        | FBgn0263132 | <b>2.38</b> |              |             |  |
| <i>CG4367</i>      | FBgn0038783 | <b>2.39</b> |              |             |  |
| <i>obst-H</i>      | FBgn0053983 | <b>2.39</b> | <b>11.78</b> |             |  |
| <i>Cpr67Fa1</i>    | FBgn0036108 | <b>2.41</b> |              |             |  |
| <i>Gasp</i>        | FBgn0026077 | <b>2.43</b> |              |             |  |
| <i>Cpr67Fa2</i>    | FBgn0036109 | <b>2.45</b> |              |             |  |
| <i>CG7252</i>      | FBgn0036226 | <b>2.46</b> |              |             |  |
| <i>CG33468</i>     | FBgn0053468 | <b>2.46</b> | <b>4.91</b>  | <b>2.57</b> |  |
| <i>nrm</i>         | FBgn0262509 | <b>2.48</b> |              |             |  |
| <i>Lcp65Ag3</i>    | FBgn0086611 | <b>2.50</b> |              |             |  |
| <i>Lcp65Ag2</i>    | FBgn0020637 | <b>2.51</b> |              |             |  |
| <i>Muc11A</i>      | FBgn0052656 | <b>2.68</b> |              |             |  |
| <i>CG32284</i>     | FBgn0052284 | <b>2.69</b> |              |             |  |
| <i>obst-F</i>      | FBgn0036947 | <b>2.77</b> |              |             |  |
| <i>Mur18B</i>      | FBgn0030999 | <b>2.79</b> |              |             |  |
| <i>CG43896</i>     | FBgn0264488 | <b>2.85</b> |              |             |  |
| <i>CG43896</i>     | FBgn0264488 | <b>2.91</b> |              |             |  |
| <i>Cpr62Bc</i>     | FBgn0035281 | <b>2.95</b> |              |             |  |
| <i>CG5883</i>      | FBgn0036225 | <b>2.95</b> |              |             |  |
| <i>PH4alphaSG1</i> | FBgn0051014 | <b>3.07</b> |              |             |  |
| <i>Muc96D</i>      | FBgn0051439 | <b>3.18</b> |              |             |  |
| <i>PH4alphaPV</i>  | FBgn0051015 | <b>3.27</b> |              |             |  |
| <i>Tg</i>          | FBgn0031975 | <b>3.41</b> | <b>0.241</b> |             |  |
| <i>Muc18B</i>      | FBgn0031000 | <b>3.63</b> | <b>2.48</b>  |             |  |
| <i>Cpr49Ah</i>     | FBgn0033731 | <b>3.86</b> |              |             |  |
| <i>Cpr11A</i>      | FBgn0030394 | <b>3.97</b> |              |             |  |
| <i>obst-E</i>      | FBgn0031737 | <b>3.97</b> |              |             |  |
| <i>CG10725</i>     | FBgn0036362 | <b>4.20</b> |              |             |  |
| <i>TwdIO</i>       | FBgn0039438 | <b>4.35</b> |              |             |  |
| <i>Mal-A3</i>      | FBgn0002571 | <b>4.47</b> |              |             |  |
| <i>ng2</i>         | FBgn0010294 | <b>5.17</b> |              |             |  |
| <i>Cpr49Af</i>     | FBgn0033729 | <b>5.21</b> |              |             |  |
| <i>ng1</i>         | FBgn0002933 | <b>5.94</b> |              |             |  |
| <i>CG10154</i>     | FBgn0036361 | <b>6.68</b> |              |             |  |
| <i>Muc55B</i>      | FBgn0034294 | <b>6.96</b> |              |             |  |
| <i>CG15515</i>     | FBgn0039719 | <b>7.16</b> |              |             |  |
| <i>CG4835</i>      | FBgn0035607 | <b>10.1</b> |              |             |  |
| <i>Cpr47Eb</i>     | FBgn0033598 | <b>14.1</b> | <b>25.21</b> |             |  |
| <i>CG12491</i>     | FBgn0034900 | <b>31.8</b> | <b>6.23</b>  |             |  |
| <b>transport</b>   |             |             |              |             |  |

|                 |             |             |              |             |              |
|-----------------|-------------|-------------|--------------|-------------|--------------|
| <i>CG16989</i>  | FBgn0025621 | <b>2.03</b> |              |             |              |
| <i>Oatp74D</i>  | FBgn0036732 | <b>2.04</b> | <b>2.37</b>  |             |              |
| <i>Prestin</i>  | FBgn0036770 | <b>2.06</b> | <b>2.22</b>  |             |              |
| <i>CG7458</i>   | FBgn0037144 | <b>2.06</b> |              |             | <b>0.413</b> |
| <i>CG11147</i>  | FBgn0031734 | <b>2.10</b> |              |             |              |
| <i>CG1718</i>   | FBgn0031170 | <b>2.13</b> | <b>2.30</b>  |             |              |
| <i>CG9702</i>   | FBgn0039787 | <b>2.13</b> |              |             |              |
| <i>CG11897</i>  | FBgn0039644 | <b>2.14</b> | <b>5.52</b>  | <b>2.61</b> | <b>2.59</b>  |
| <i>CG5326</i>   | FBgn0038983 | <b>2.16</b> | <b>2.44</b>  |             |              |
| <i>CG7084</i>   | FBgn0038938 | <b>2.16</b> |              |             |              |
| <i>MRP</i>      | FBgn0032456 | <b>2.16</b> | <b>2.08</b>  |             |              |
| <i>CG6901</i>   | FBgn0038414 | <b>2.17</b> |              |             |              |
| <i>CG8028</i>   | FBgn0031010 | <b>2.17</b> |              |             |              |
| <i>CG9413</i>   | FBgn0030574 | <b>2.20</b> |              |             |              |
| <i>Mdr65</i>    | FBgn0004513 | <b>2.27</b> |              |             |              |
| <i>ppk6</i>     | FBgn0034489 | <b>2.39</b> |              |             |              |
| <i>p24-2</i>    | FBgn0053105 | <b>2.39</b> | <b>0.122</b> |             |              |
| <i>CG31792</i>  | FBgn0051792 | <b>2.43</b> |              |             |              |
| <i>Vha100-4</i> | FBgn0038613 | <b>2.43</b> |              |             |              |
| <i>CG30016</i>  | FBgn0050016 | <b>2.50</b> |              |             |              |
| <i>hoe1</i>     | FBgn0041150 | <b>2.53</b> |              |             |              |
| <i>Tsf1</i>     | FBgn0022355 | <b>2.57</b> | <b>7.68</b>  |             |              |
| <i>CG31743</i>  | FBgn0032618 | <b>2.60</b> |              |             | <b>4.18</b>  |
| <i>path</i>     | FBgn0036007 | <b>2.60</b> |              |             |              |
| <i>AQP</i>      | FBgn0033807 | <b>2.64</b> |              |             |              |
| <i>Smt</i>      | FBgn0039873 | <b>2.68</b> |              |             |              |
| <i>Tsf1</i>     | FBgn0022355 | <b>2.69</b> | <b>7.68</b>  |             |              |
| <i>CG10505</i>  | FBgn0034612 | <b>2.71</b> |              |             |              |
| <i>Oatp58Dc</i> | FBgn0034716 | <b>2.73</b> |              |             |              |
| <i>CG9981</i>   | FBgn0030746 | <b>2.77</b> |              | <b>9.00</b> |              |
| <i>Calx</i>     | FBgn0013995 | <b>2.81</b> |              |             |              |
| <i>CG13124</i>  | FBgn0032156 | <b>2.91</b> |              |             |              |
| <i>Rab9</i>     | FBgn0032782 | <b>2.93</b> | <b>2.56</b>  |             |              |
| <i>CG17636</i>  | FBgn0025837 | <b>2.97</b> |              |             |              |
| <i>CG33281</i>  | FBgn0053281 | <b>3.01</b> |              |             |              |
| <i>Rh50</i>     | FBgn0028699 | <b>3.01</b> |              |             |              |
| <i>CG30272</i>  | FBgn0050272 | <b>3.05</b> |              |             |              |
| <i>Oatp33Eb</i> | FBgn0032435 | <b>3.14</b> |              |             |              |
| <i>CG7912</i>   | FBgn0039736 | <b>3.16</b> |              |             |              |
| <i>CG8791</i>   | FBgn0033234 | <b>3.20</b> | <b>13.03</b> |             |              |
| <i>salt</i>     | FBgn0039872 | <b>3.27</b> |              |             |              |
| <i>CG8051</i>   | FBgn0031012 | <b>4.03</b> |              |             |              |
| <i>CG2187</i>   | FBgn0017448 | <b>4.06</b> | <b>3.10</b>  |             |              |
| <i>st</i>       | FBgn0003515 | <b>4.06</b> |              |             |              |
| <i>CG4830</i>   | FBgn0037996 | <b>4.35</b> |              |             |              |
| <i>CG6293</i>   | FBgn0037807 | <b>4.99</b> | <b>3.59</b>  |             |              |
| <i>CG9780</i>   | FBgn0037230 | <b>5.13</b> | <b>17.37</b> |             |              |
| <i>CG18327</i>  | FBgn0033904 | <b>5.66</b> |              |             |              |
| <i>Nha2</i>     | FBgn0263390 | <b>6.11</b> |              | <b>2.32</b> |              |
| <i>CG4991</i>   | FBgn0030817 | <b>6.82</b> | <b>3.76</b>  |             |              |
| <i>CG9825</i>   | FBgn0034783 | <b>6.96</b> |              |             |              |
| <i>CG8654</i>   | FBgn0034479 | <b>9.85</b> |              |             |              |

| <b>unknown function</b> |             |             |              |             |             |
|-------------------------|-------------|-------------|--------------|-------------|-------------|
| <i>CG9682</i>           | FBgn0039760 | <b>2.00</b> |              |             |             |
| <i>CG11158</i>          | FBgn0030511 | <b>2.01</b> | <b>2.73</b>  |             |             |
| <i>llp8</i>             | FBgn0036690 | <b>2.01</b> |              |             |             |
| <i>CG17147</i>          | FBgn0260393 | <b>2.01</b> |              |             |             |
| <i>CG7992</i>           | FBgn0031004 | <b>2.03</b> |              |             |             |
| <i>CG15597</i>          | FBgn0037420 | <b>2.03</b> |              |             |             |
| <i>CG13360</i>          | FBgn0025620 | <b>2.04</b> |              |             |             |
| <i>CG15236</i>          | FBgn0033108 | <b>2.04</b> |              |             |             |
| <i>Piezo</i>            | FBgn0264953 | <b>2.04</b> |              |             |             |
| <i>Rcd2</i>             | FBgn0037012 | <b>2.04</b> | <b>6.47</b>  |             |             |
| <i>CG32485</i>          | FBgn0052485 | <b>2.04</b> |              |             |             |
| <i>CG11168</i>          | FBgn0039249 | <b>2.06</b> |              |             |             |
| <i>jp</i>               | FBgn0032129 | <b>2.06</b> | <b>0.303</b> |             |             |
| <i>CG15523</i>          | FBgn0039727 | <b>2.06</b> | <b>0.328</b> |             |             |
| <i>CG5399</i>           | FBgn0038353 | <b>2.06</b> | <b>28.01</b> | <b>2.91</b> |             |
| <i>CG5819</i>           | FBgn0034717 | <b>2.07</b> |              |             |             |
| <i>CG15043</i>          | FBgn0030929 | <b>2.07</b> |              |             |             |
| <i>CG8177</i>           | FBgn0036043 | <b>2.08</b> | <b>0.177</b> |             |             |
| <i>CG8087</i>           | FBgn0038241 | <b>2.08</b> | <b>0.445</b> |             |             |
| <i>CG31321</i>          | FBgn0051321 | <b>2.10</b> |              |             |             |
| <i>CG12075</i>          | FBgn0030065 | <b>2.10</b> |              |             |             |
| <i>CG7920</i>           | FBgn0039737 | <b>2.10</b> |              |             |             |
| <i>CG14907</i>          | FBgn0038455 | <b>2.10</b> | <b>6.93</b>  |             |             |
| <i>Tyler</i>            | FBgn0031038 | <b>2.10</b> | <b>2.09</b>  |             |             |
| <i>CG12826</i>          | FBgn0033207 | <b>2.10</b> | <b>6.33</b>  |             |             |
| <i>CG5506</i>           | FBgn0036766 | <b>2.10</b> |              |             |             |
| <i>LP09564</i>          | FBcl0187291 | <b>2.10</b> |              |             |             |
| <i>Pebp1</i>            | FBgn0038973 | <b>2.11</b> |              |             |             |
| <i>CG32714</i>          | FBgn0260483 | <b>2.13</b> |              |             |             |
| <i>CG10936</i>          | FBgn0034253 | <b>2.14</b> | <b>9.27</b>  |             |             |
| <i>CG13806</i>          | FBgn0035325 | <b>2.14</b> |              |             |             |
| <i>Rootletin</i>        | FBgn0039152 | <b>2.16</b> |              |             |             |
| <i>CG5084</i>           | FBgn0034288 | <b>2.16</b> |              |             |             |
| <i>GM03661</i>          | FBcl0137693 | <b>2.16</b> |              |             |             |
| <i>CG14456</i>          | FBgn0037176 | <b>2.17</b> |              |             |             |
| <i>atilla</i>           | FBgn0032422 | <b>2.17</b> |              |             |             |
| <i>CG2010</i>           | FBgn0039667 | <b>2.20</b> |              |             |             |
| <i>Pdxk</i>             | FBgn0085484 | <b>2.22</b> |              |             |             |
| <i>CG5767</i>           | FBgn0034292 | <b>2.22</b> |              |             |             |
| <i>CG8852</i>           | FBgn0031548 | <b>2.23</b> |              |             |             |
| <i>CG31974</i>          | FBgn0051974 | <b>2.23</b> | <b>4.74</b>  |             | <b>2.12</b> |
| <i>CG40198</i>          | FBgn0058198 | <b>2.23</b> |              |             |             |
| <i>CG12177</i>          | FBgn0030510 | <b>2.25</b> | <b>6.26</b>  |             |             |
| <i>CG43693</i>          | FBgn0263776 | <b>2.27</b> |              |             |             |
| <i>CG13912</i>          | FBgn0035186 | <b>2.27</b> |              | <b>2.23</b> |             |
| <i>CG13003</i>          | FBgn0030798 | <b>2.28</b> |              |             |             |
| <i>Ect4</i>             | FBgn0262579 | <b>2.28</b> |              | <b>2.17</b> |             |
| <i>CG11313</i>          | FBgn0039798 | <b>2.30</b> | <b>5.46</b>  |             |             |
| <i>CG14273</i>          | FBgn0032024 | <b>2.30</b> |              |             |             |
| <i>CG32603</i>          | FBgn0052603 | <b>2.30</b> |              |             |             |
| <i>CG5866</i>           | FBgn0038508 | <b>2.31</b> |              |             |             |

|                  |             |      |       |       |
|------------------|-------------|------|-------|-------|
| <i>TwdlBeta</i>  | FBgn0033658 | 2.31 |       |       |
| <i>CG31769</i>   | FBgn0051769 | 2.33 | 2.49  | 0.380 |
| <i>CG4733</i>    | FBgn0038744 | 2.33 |       |       |
| <i>CG34120</i>   | FBgn0083956 | 2.35 |       |       |
| <i>CG6023</i>    | FBgn0030912 | 2.35 | 2.88  |       |
| <i>CG43078</i>   | FBgn0262508 | 2.35 |       |       |
| <i>CG2157</i>    | FBgn0030244 | 2.35 |       |       |
| <i>CG9399</i>    | FBgn0037715 | 2.36 | 2.74  |       |
| <i>CG30411</i>   | FBgn0050411 | 2.36 | 0.040 |       |
| <i>CG9568</i>    | FBgn0032087 | 2.38 |       |       |
| <i>CG31446</i>   | FBgn0051446 | 2.38 |       |       |
| <i>CG18635</i>   | FBgn0034279 | 2.38 |       |       |
| <i>Gllspla2</i>  | FBgn0030013 | 2.39 |       |       |
| <i>CG1698</i>    | FBgn0033443 | 2.39 |       |       |
| <i>CG42249</i>   | FBgn0259101 | 2.41 |       |       |
| <i>CG15199</i>   | FBgn0030270 | 2.41 | 3.28  |       |
| <i>CG31086</i>   | FBgn0051086 | 2.41 |       |       |
| <i>CG9626</i>    | FBgn0037565 | 2.46 |       |       |
| <i>CG31259</i>   | FBgn0051259 | 2.48 |       |       |
| <i>CG17108</i>   | FBgn0032285 | 2.48 |       |       |
| <i>CG14893</i>   | FBgn0038451 | 2.50 |       |       |
| <i>CG5535</i>    | FBgn0036764 | 2.51 | 7.41  |       |
| <i>CG31269</i>   | FBgn0051269 | 2.57 |       |       |
| <i>CG33469</i>   | FBgn0053469 | 2.58 |       |       |
| <i>CG13323</i>   | FBgn0033788 | 2.58 |       |       |
| <i>CG16820</i>   | FBgn0032495 | 2.60 |       |       |
| <i>CR14033</i>   | FBgn0046776 | 2.60 | 41.33 |       |
| <i>CG31464</i>   | FBgn0051464 | 2.64 |       |       |
| <i>HDC07637</i>  |             | 2.64 |       |       |
| <i>ppk13</i>     | FBgn0053508 | 2.66 |       |       |
| <i>SP1173</i>    | FBgn0035710 | 2.71 |       |       |
| <i>ps</i>        | FBgn0261552 | 2.71 |       |       |
| <i>CG7900</i>    | FBgn0037548 | 2.71 | 2.96  | 0.476 |
| <i>Lmpt</i>      | FBgn0261565 | 2.73 |       |       |
| <i>CG31288</i>   | FBgn0051288 | 2.75 | 28.68 |       |
| <i>CG17167</i>   | FBgn0039941 | 2.75 |       |       |
| <i>CG12105</i>   | FBgn0035241 | 2.75 |       |       |
| <i>Skeletor</i>  | FBgn0262717 | 2.75 |       |       |
| <i>CG44250</i>   | FBgn0265185 | 2.75 |       |       |
| <i>CG13492</i>   | FBgn0034662 | 2.77 |       |       |
| <i>I(1)G0196</i> | FBgn0027279 | 2.79 |       |       |
| <i>HDC03517</i>  |             | 2.79 |       |       |
| <i>CG43897</i>   | FBgn0264489 | 2.79 |       |       |
| <i>CT22789</i>   |             | 2.81 |       |       |
| <i>mtg</i>       | FBgn0260386 | 2.83 |       | 2.11  |
| <i>CR31781</i>   | FBgn0051781 | 2.85 | 0.354 |       |
| <i>CG15412</i>   | FBgn0031528 | 2.85 |       |       |
| <i>CG11160</i>   | FBgn0030257 | 2.87 |       |       |
| <i>CG10597</i>   | FBgn0030832 | 2.87 |       |       |
| <i>CG15741</i>   | FBgn0030338 | 2.91 | 76.88 |       |
| <i>CG10732</i>   | FBgn0036365 | 2.93 |       |       |
| <i>CG7631</i>    | FBgn0028945 | 2.99 |       |       |

|                          |             |              |              |             |              |
|--------------------------|-------------|--------------|--------------|-------------|--------------|
| <i>CG32198</i>           | FBgn0052198 | <b>3.12</b>  |              |             |              |
| <i>CG15213</i>           | FBgn0040843 | <b>3.12</b>  |              |             |              |
| <i>CG7300</i>            | FBgn0032286 | <b>3.16</b>  |              |             |              |
| <i>CG43427</i>           | FBgn0263346 | <b>3.20</b>  |              |             |              |
| <i>CG14852</i>           | FBgn0038242 | <b>3.20</b>  | <b>0.084</b> |             |              |
| <i>CG34278</i>           | FBgn0085307 | <b>3.25</b>  | <b>4.76</b>  |             |              |
| <i>CG13102</i>           | FBgn0032088 | <b>3.32</b>  |              |             |              |
| <i>Cpr47Ec</i>           | FBgn0033600 | <b>3.32</b>  |              |             |              |
| <i>Obp83g</i>            | FBgn0046875 | <b>3.32</b>  |              |             |              |
| <i>CR31781</i>           | FBgn0051781 | <b>3.34</b>  | <b>0.354</b> |             |              |
| <i>GM10545</i>           | FBcl0137569 | <b>3.34</b>  |              |             |              |
| HDC03535                 |             | <b>3.36</b>  |              |             |              |
| <i>CG15530</i>           | FBgn0039752 | <b>3.41</b>  |              |             |              |
| <i>CG9396</i>            | FBgn0037714 | <b>3.53</b>  | <b>5.56</b>  |             |              |
| CT37020                  |             | <b>3.56</b>  |              |             |              |
| <i>GstD7</i>             | FBgn0010043 | <b>3.61</b>  | <b>3.98</b>  |             | <b>12.65</b> |
| <i>CG13705</i>           | FBgn0035582 | <b>3.78</b>  |              |             |              |
| <i>CG13946</i>           | FBgn0040725 | <b>3.92</b>  | <b>30.28</b> |             |              |
| <i>CG4962</i>            | FBgn0036597 | <b>4.03</b>  |              |             |              |
| <i>CG14292</i>           | FBgn0038658 | <b>4.11</b>  |              |             |              |
| <i>CG42565</i>           | FBgn0260767 | <b>4.47</b>  |              |             |              |
| <i>CG32241</i>           | FBgn0052241 | <b>4.72</b>  |              |             |              |
| <i>CG5810</i>            | FBgn0038866 | <b>4.79</b>  |              |             |              |
| <i>CG13460</i>           | FBgn0036471 | <b>4.79</b>  |              |             |              |
| <i>CG18649</i>           | FBgn0036469 | <b>5.06</b>  |              |             |              |
| <i>CG11350</i>           | FBgn0035552 | <b>5.28</b>  |              |             |              |
| <i>CG8773</i>            | FBgn0038135 | <b>5.35</b>  |              |             |              |
| <i>CG43078</i>           | FBgn0262508 | <b>5.58</b>  |              |             |              |
| <i>CG2064</i>            | FBgn0033205 | <b>5.86</b>  | <b>2.24</b>  |             |              |
| <i>CG14120</i>           | FBgn0036321 | <b>6.02</b>  |              |             |              |
| <i>CG14879</i>           | FBgn0038419 | <b>6.15</b>  |              |             |              |
| <i>CG32073</i>           | FBgn0052073 | <b>6.19</b>  | <b>19.44</b> |             |              |
| <i>CG10953</i>           | FBgn0034204 | <b>6.23</b>  |              |             |              |
| <i>CG9555</i>            | FBgn0032085 | <b>8.00</b>  |              |             |              |
| <i>Cyp4p3</i>            | FBgn0033397 | <b>8.75</b>  | <b>9.73</b>  | <b>2.75</b> |              |
| <i>CG12506</i>           | FBgn0031276 | <b>9.92</b>  | <b>18.91</b> |             |              |
| <i>CG32564</i>           | FBgn0052564 | <b>14.93</b> | <b>3.08</b>  |             |              |
| <i>CG8534</i>            | FBgn0037761 | <b>3.10</b>  |              |             |              |
| <i>CG13640</i>           | FBgn0039237 | <b>6.23</b>  |              |             |              |
| <b>Chd1 effect: DOWN</b> |             |              |              |             |              |
| <b>detoxification</b>    |             |              |              |             |              |
| <i>Cyp312a1</i>          | FBgn0036778 | <b>0.497</b> |              |             |              |
| <i>Cyp6d5</i>            | FBgn0038194 | <b>0.490</b> |              | <b>3.00</b> | <b>13.46</b> |
| <i>Cyp309a1</i>          | FBgn0031432 | <b>0.444</b> | <b>2.62</b>  |             |              |
| <i>GstE3</i>             | FBgn0063497 | <b>0.432</b> |              | <b>5.89</b> |              |
| <i>GstD10</i>            | FBgn0042206 | <b>0.409</b> |              |             |              |
| <i>Hsp22</i>             | FBgn0001223 | <b>0.342</b> | <b>2.94</b>  |             |              |
| <i>GstT3</i>             | FBgn0031117 | <b>0.337</b> | <b>2.41</b>  |             |              |
| <i>CG6762</i>            | FBgn0030876 | <b>0.316</b> |              |             |              |
| <i>Hsp26</i>             | FBgn0001225 | <b>0.304</b> |              |             |              |
| <i>GstE1</i>             | FBgn0034335 | <b>0.304</b> | <b>2.21</b>  |             |              |
| <i>MtnD</i>              | FBgn0053192 | <b>0.287</b> | <b>12.01</b> |             |              |



|                         |             |              |              |              |             |
|-------------------------|-------------|--------------|--------------|--------------|-------------|
| <i>CG17323</i>          | FBgn0032713 | <b>0.272</b> |              |              |             |
| <i>MtnC</i>             | FBgn0038790 | <b>0.248</b> |              |              |             |
| <i>GstD2</i>            | FBgn0010038 | <b>0.235</b> | <b>9.61</b>  | <b>2.74</b>  |             |
| <i>GstD4</i>            | FBgn0010040 | <b>0.216</b> |              |              |             |
| <i>Hsp67Bc</i>          | FBgn0001229 | <b>0.200</b> | <b>2.74</b>  | <b>2.38</b>  |             |
| <i>NLaz</i>             | FBgn0053126 | <b>0.171</b> |              |              |             |
| <i>CG7227</i>           | FBgn0031970 | <b>0.143</b> | <b>0.310</b> |              |             |
| <i>MtnB</i>             | FBgn0002869 | <b>0.092</b> |              |              |             |
| <b>development</b>      |             |              |              |              |             |
| <i>yellow-d2</i>        | FBgn0034856 | <b>0.497</b> |              |              |             |
| <i>sad</i>              | FBgn0003312 | <b>0.493</b> |              |              |             |
| <i>rdo</i>              | FBgn0243486 | <b>0.473</b> | <b>0.207</b> |              |             |
| <i>ImpE1</i>            | FBgn0001253 | <b>0.435</b> |              |              |             |
| <i>in</i>               | FBgn0001259 | <b>0.432</b> |              |              |             |
| <i>neo</i>              | FBgn0039704 | <b>0.409</b> |              |              |             |
| <i>CG15153</i>          | FBgn0032663 | <b>0.361</b> |              |              |             |
| <i>CG18607</i>          | FBgn0034429 | <b>0.344</b> |              |              |             |
| <i>nvd</i>              | FBgn0259697 | <b>0.312</b> |              |              |             |
| <i>CG9005</i>           | FBgn0033638 | <b>0.272</b> | <b>0.260</b> |              |             |
| <i>ImpE1</i>            | FBgn0001253 | <b>0.264</b> |              |              |             |
| <i>CG2016</i>           | FBgn0250839 | <b>0.188</b> |              |              |             |
| <i>Eig71Ed</i>          | FBgn0004591 | <b>0.184</b> | <b>0.127</b> |              |             |
| <i>Yp3</i>              | FBgn0004047 | <b>0.180</b> |              | <b>16.14</b> |             |
| <i>Eip74EF</i>          | FBgn0000567 | <b>0.176</b> | <b>0.341</b> |              |             |
| <i>ImpE3</i>            | FBgn0001255 | <b>0.171</b> |              |              | <b>2.10</b> |
| <i>Eip78C</i>           | FBgn0004865 | <b>0.144</b> | <b>0.136</b> | <b>2.12</b>  |             |
| <i>ImpE2</i>            | FBgn0001254 | <b>0.132</b> |              |              |             |
| <i>Eig71Ea</i>          | FBgn0004588 | <b>0.126</b> | <b>0.037</b> |              |             |
| <i>Eig71Ec</i>          | FBgn0004590 | <b>0.115</b> |              |              |             |
| <i>slbo</i>             | FBgn0005638 | <b>0.115</b> | <b>5.57</b>  |              |             |
| <i>Eig71Eg</i>          | FBgn0004594 | <b>0.103</b> | <b>0.027</b> |              |             |
| <i>Eig71Eb</i>          | FBgn0004589 | <b>0.023</b> | <b>0.403</b> |              |             |
| <b>immune response</b>  |             |              |              |              |             |
| <i>sn</i>               | FBgn0003447 | <b>0.476</b> |              |              |             |
| <i>Hsp27</i>            | FBgn0001226 | <b>0.457</b> |              |              | <b>2.41</b> |
| <i>Drs</i>              | FBgn0010381 | <b>0.451</b> | <b>4.28</b>  | <b>2.53</b>  | <b>3.78</b> |
| <i>Mtk</i>              | FBgn0014865 | <b>0.438</b> |              | <b>4.93</b>  | <b>6.09</b> |
| <i>CG8157</i>           | FBgn0034010 | <b>0.374</b> | <b>3.95</b>  |              |             |
| <i>CG4091</i>           | FBgn0034894 | <b>0.354</b> |              |              |             |
| <i>LysX</i>             | FBgn0004431 | <b>0.344</b> | <b>33.21</b> | <b>2.92</b>  |             |
| <i>AttA</i>             | FBgn0012042 | <b>0.337</b> |              | <b>7.68</b>  |             |
| <i>E(spl)malpha-BFM</i> | FBgn0002732 | <b>0.334</b> | <b>3.57</b>  |              |             |
| <i>spz3</i>             | FBgn0031959 | <b>0.332</b> |              |              |             |
| <i>Tsp42Ep</i>          | FBgn0033137 | <b>0.332</b> | <b>0.395</b> |              |             |
| <i>Atg7</i>             | FBgn0034366 | <b>0.306</b> |              |              |             |
| <i>dsb</i>              | FBgn0035290 | <b>0.301</b> | <b>0.423</b> |              |             |
| <i>E(spl)m2-BFM</i>     | FBgn0002592 | <b>0.291</b> |              |              |             |
| <i>CG9616</i>           | FBgn0038214 | <b>0.289</b> |              |              |             |
| <i>NimC2</i>            | FBgn0028939 | <b>0.287</b> | <b>0.140</b> |              |             |
| <i>spirit</i>           | FBgn0030051 | <b>0.266</b> |              |              |             |
| <i>Mmp1</i>             | FBgn0035049 | <b>0.264</b> | <b>15.55</b> | <b>2.88</b>  | <b>3.34</b> |
| <i>wbl</i>              | FBgn0004003 | <b>0.261</b> | <b>0.495</b> |              |             |

|                                |             |              |               |              |             |
|--------------------------------|-------------|--------------|---------------|--------------|-------------|
| <i>Npc2e</i>                   | FBgn0051410 | <b>0.233</b> | <b>0.028</b>  |              |             |
| <i>PGRP-SC2</i>                | FBgn0043575 | <b>0.222</b> | <b>2.66</b>   | <b>2.37</b>  |             |
| <i>santa-maria</i>             | FBgn0025697 | <b>0.218</b> | <b>0.036</b>  |              |             |
| <i>IM2</i>                     | FBgn0025583 | <b>0.218</b> |               |              |             |
| <i>CG11425</i>                 | FBgn0037167 | <b>0.183</b> |               |              |             |
| <i>CG2065</i>                  | FBgn0033204 | <b>0.163</b> | <b>9.00</b>   | <b>2.72</b>  |             |
| <i>CG3397</i>                  | FBgn0037975 | <b>0.162</b> |               | <b>3.78</b>  |             |
| <i>Spn43Aa</i>                 | FBgn0024294 | <b>0.160</b> | <b>0.336</b>  |              |             |
| <i>CG6429</i>                  | FBgn0046999 | <b>0.147</b> |               |              |             |
| <i>IM3</i>                     | FBgn0040736 | <b>0.139</b> | <b>11.65</b>  |              |             |
| <i>PGRP-SB1</i>                | FBgn0043578 | <b>0.108</b> |               | <b>3.12</b>  |             |
| <i>IM1</i>                     | FBgn0034329 | <b>0.104</b> | <b>33.02</b>  |              |             |
| <i>Drsl5</i>                   | FBgn0035434 | <b>0.092</b> |               |              |             |
| <i>Spn100A</i>                 | FBgn0039795 | <b>0.067</b> |               |              |             |
| <i>CG13606</i>                 | FBgn0039161 | <b>0.042</b> |               |              |             |
| <i>PGRP-SB2</i>                | FBgn0043577 | <b>0.023</b> | <b>12.29</b>  |              |             |
| <i>Drsl2</i>                   | FBgn0052279 | <b>0.020</b> |               |              |             |
| <b>intracellular processes</b> |             |              |               |              |             |
| <i>CG5745</i>                  | FBgn0038855 | <b>0.497</b> |               |              |             |
| <i>CG17754</i>                 | FBgn0030114 | <b>0.490</b> | <b>2.66</b>   |              | <b>2.07</b> |
| <i>insc</i>                    | FBgn0011674 | <b>0.490</b> |               |              |             |
| <i>CG8420</i>                  | FBgn0037664 | <b>0.490</b> |               |              |             |
| <i>GV1</i>                     | FBgn0027790 | <b>0.486</b> |               |              |             |
| <i>RpL22-like</i>              | FBgn0034837 | <b>0.483</b> |               |              |             |
| <i>RpS19b</i>                  | FBgn0039129 | <b>0.483</b> |               |              |             |
| <i>His2B:CG17949</i>           | FBgn0061209 | <b>0.476</b> |               |              |             |
| <i>CG4496</i>                  | FBgn0031894 | <b>0.476</b> | <b>0.293</b>  |              |             |
| <i>lbm</i>                     | FBgn0016032 | <b>0.476</b> |               |              |             |
| <i>nsr</i>                     | FBgn0034740 | <b>0.476</b> |               |              |             |
| <i>Eip71CD</i>                 | FBgn0000565 | <b>0.473</b> |               |              |             |
| <i>Drep-3</i>                  | FBgn0028407 | <b>0.470</b> |               |              |             |
| <i>CG32971</i>                 | FBgn0052971 | <b>0.470</b> |               |              |             |
| <i>tbrd-1</i>                  | FBgn0039124 | <b>0.470</b> |               |              |             |
| <i>Scr</i>                     | FBgn0003339 | <b>0.467</b> |               |              |             |
| <i>sc</i>                      | FBgn0004170 | <b>0.460</b> |               |              |             |
| <i>MED9</i>                    | FBgn0260401 | <b>0.457</b> |               |              |             |
| <i>CG30431</i>                 | FBgn0050431 | <b>0.457</b> |               |              |             |
| <i>en</i>                      | FBgn0000577 | <b>0.454</b> |               |              |             |
| <i>CG17450</i>                 | FBgn0040028 | <b>0.454</b> |               |              |             |
| <i>CG3726</i>                  | FBgn0029824 | <b>0.448</b> |               |              |             |
| <i>thoc6</i>                   | FBgn0036263 | <b>0.448</b> |               |              |             |
| <i>RpL37b</i>                  | FBgn0034822 | <b>0.444</b> |               |              |             |
| <i>Lmpt</i>                    | FBgn0261565 | <b>0.444</b> |               |              |             |
| <i>CG31642</i>                 | FBgn0051642 | <b>0.435</b> |               | <b>79.80</b> |             |
| <i>Hsp67Ba</i>                 | FBgn0001227 | <b>0.429</b> | <b>3.25</b>   |              |             |
| <i>Dark</i>                    | FBgn0263864 | <b>0.418</b> |               |              | <b>2.02</b> |
| <i>CG31274</i>                 | FBgn0051274 | <b>0.418</b> | <b>0.342</b>  |              | <b>5.24</b> |
| <i>betaNACtes4</i>             | FBgn0030566 | <b>0.415</b> |               |              |             |
| <i>CG6891</i>                  | FBgn0030955 | <b>0.412</b> |               |              |             |
| <i>CG12493</i>                 | FBgn0035571 | <b>0.406</b> | <b>117.75</b> |              |             |
| <i>GV1</i>                     | FBgn0027790 | <b>0.398</b> |               |              |             |
| <i>CG18446</i>                 | FBgn0033458 | <b>0.395</b> | <b>2.05</b>   | <b>2.27</b>  |             |

|                      |             |              |               |             |              |
|----------------------|-------------|--------------|---------------|-------------|--------------|
| <i>CG8335</i>        | FBgn0033069 | <b>0.392</b> |               |             |              |
| <i>His1:CG31617</i>  | FBgn0051617 | <b>0.387</b> |               |             |              |
| <i>Eip93F</i>        | FBgn0264490 | <b>0.384</b> |               |             |              |
| <i>CR11386</i>       | FBgn0260447 | <b>0.382</b> |               |             |              |
| <i>toy</i>           | FBgn0019650 | <b>0.379</b> | <b>24.16</b>  |             |              |
| <i>E(spl)m7-HLH</i>  | FBgn0002633 | <b>0.376</b> |               |             |              |
| <i>CG4080</i>        | FBgn0035983 | <b>0.369</b> | <b>0.405</b>  |             |              |
| <i>Taf12L</i>        | FBgn0031623 | <b>0.369</b> | <b>191.54</b> |             |              |
| <i>betaNACtes3</i>   | FBgn0052601 | <b>0.369</b> |               |             |              |
| <i>CG12477</i>       | FBgn0036809 | <b>0.356</b> |               |             |              |
| <i>CG8679</i>        | FBgn0032934 | <b>0.344</b> |               |             |              |
| <i>E(spl)m8-HLH</i>  | FBgn0000591 | <b>0.337</b> |               |             |              |
| <i>toy</i>           | FBgn0019650 | <b>0.332</b> | <b>24.16</b>  |             |              |
| <i>His2A:CG31618</i> | FBgn0051618 | <b>0.330</b> |               |             |              |
| <i>blanks</i>        | FBgn0035608 | <b>0.321</b> | <b>98.58</b>  |             | <b>0.453</b> |
| <i>CG4021</i>        | FBgn0034659 | <b>0.281</b> |               |             |              |
| <i>CG7804</i>        | FBgn0036496 | <b>0.270</b> |               |             |              |
| <i>CG9989</i>        | FBgn0039593 | <b>0.261</b> |               | <b>8.99</b> |              |
| <i>CG34434</i>       | FBgn0250904 | <b>0.200</b> |               |             |              |
| <i>CG17386</i>       | FBgn0033936 | <b>0.087</b> |               |             |              |
| <i>Chd1</i>          | FBgn0250786 | <b>0.013</b> |               |             |              |
| <b>metabolism</b>    |             |              |               |             |              |
| <i>CAH1</i>          | FBgn0027844 | <b>0.493</b> | <b>2.25</b>   | <b>2.30</b> | <b>2.11</b>  |
| <i>Ho</i>            | FBgn0037933 | <b>0.493</b> |               |             |              |
| <i>CG1637</i>        | FBgn0030245 | <b>0.486</b> |               |             |              |
| <i>CG1941</i>        | FBgn0033214 | <b>0.486</b> |               |             |              |
| <i>CG7742</i>        | FBgn0031690 | <b>0.486</b> |               |             |              |
| <i>CG3376</i>        | FBgn0034997 | <b>0.486</b> | <b>0.330</b>  |             |              |
| <i>CLS</i>           | FBgn0039360 | <b>0.476</b> |               |             |              |
| <i>wat</i>           | FBgn0039620 | <b>0.470</b> |               |             |              |
| <i>CG5554</i>        | FBgn0034914 | <b>0.463</b> | <b>0.379</b>  |             |              |
| <i>Sep5</i>          | FBgn0026361 | <b>0.454</b> | <b>2.36</b>   |             |              |
| <i>Scp2</i>          | FBgn0020907 | <b>0.451</b> |               |             |              |
| <i>Dyrk2</i>         | FBgn0016930 | <b>0.448</b> |               | <b>2.13</b> |              |
| <i>ade3</i>          | FBgn0000053 | <b>0.444</b> | <b>0.423</b>  |             |              |
| <i>CG5854</i>        | FBgn0039130 | <b>0.441</b> | <b>0.477</b>  |             |              |
| <i>CG1942</i>        | FBgn0033215 | <b>0.426</b> |               |             |              |
| <i>Oscillin</i>      | FBgn0031717 | <b>0.426</b> | <b>0.302</b>  |             |              |
| <i>CG15343</i>       | FBgn0030029 | <b>0.423</b> | <b>0.124</b>  |             | <b>3.07</b>  |
| <i>CG18528</i>       | FBgn0039189 | <b>0.423</b> |               |             |              |
| <i>CG4546</i>        | FBgn0038373 | <b>0.418</b> |               |             |              |
| <i>CG9509</i>        | FBgn0030594 | <b>0.415</b> | <b>0.147</b>  |             |              |
| <i>CG8565</i>        | FBgn0030697 | <b>0.406</b> |               |             |              |
| <i>CG13833</i>       | FBgn0039040 | <b>0.398</b> |               |             |              |
| <i>CG8112</i>        | FBgn0037612 | <b>0.395</b> | <b>0.205</b>  |             |              |
| <i>CG3264</i>        | FBgn0034712 | <b>0.392</b> |               |             |              |
| <i>Dhpr</i>          | FBgn0035964 | <b>0.387</b> |               |             |              |
| <i>CG6287</i>        | FBgn0032350 | <b>0.382</b> |               | <b>2.03</b> |              |
| <i>CG11170</i>       | FBgn0034705 | <b>0.379</b> | <b>0.365</b>  |             |              |
| <i>slow</i>          | FBgn0035539 | <b>0.376</b> | <b>2.34</b>   |             |              |
| <i>CG4586</i>        | FBgn0029924 | <b>0.376</b> | <b>0.432</b>  |             |              |
| <i>CG17191</i>       | FBgn0039473 | <b>0.376</b> |               |             |              |

|                    |             |              |              |              |              |
|--------------------|-------------|--------------|--------------|--------------|--------------|
| <i>CG12539</i>     | FBgn0030586 | <b>0.374</b> |              |              |              |
| <i>MESR6</i>       | FBgn0036846 | <b>0.361</b> | <b>0.364</b> |              |              |
| <i>CG33096</i>     | FBgn0053096 | <b>0.361</b> |              |              |              |
| <i>yellow-f</i>    | FBgn0041710 | <b>0.358</b> | <b>0.330</b> | <b>2.09</b>  |              |
| <i>Pu</i>          | FBgn0003162 | <b>0.356</b> |              |              |              |
| <i>CG3940</i>      | FBgn0037788 | <b>0.356</b> |              | <b>8.33</b>  |              |
| <i>CG7320</i>      | FBgn0036782 | <b>0.349</b> |              |              |              |
| <i>Est-P</i>       | FBgn0000594 | <b>0.342</b> |              |              |              |
| <i>CG8100</i>      | FBgn0036410 | <b>0.339</b> |              |              |              |
| <i>Ady43A</i>      | FBgn0026602 | <b>0.339</b> |              |              |              |
| <i>Nmdmc</i>       | FBgn0010222 | <b>0.330</b> |              |              |              |
| <i>CG14946</i>     | FBgn0032405 | <b>0.310</b> |              |              |              |
| <i>Asph</i>        | FBgn0034075 | <b>0.308</b> | <b>0.427</b> |              | <b>2.25</b>  |
| <i>Oat</i>         | FBgn0022774 | <b>0.306</b> | <b>0.077</b> |              | <b>3.00</b>  |
| <i>AANATL2</i>     | FBgn0031791 | <b>0.295</b> | <b>0.305</b> |              |              |
| <i>CG4842</i>      | FBgn0036620 | <b>0.289</b> |              |              |              |
| <i>spok</i>        | FBgn0086917 | <b>0.289</b> |              |              |              |
| <i>Ddc</i>         | FBgn0000422 | <b>0.259</b> |              |              |              |
| <i>CG5618</i>      | FBgn0036975 | <b>0.252</b> |              |              |              |
| <i>Acp63F</i>      | FBgn0015585 | <b>0.237</b> |              |              |              |
| <i>CG10178</i>     | FBgn0032684 | <b>0.178</b> |              |              |              |
| <i>CG5171</i>      | FBgn0031907 | <b>0.149</b> |              | <b>20.62</b> |              |
| <i>yellow-c</i>    | FBgn0041713 | <b>0.146</b> |              |              | <b>4.92</b>  |
| <i>CG4382</i>      | FBgn0032132 | <b>0.131</b> |              |              |              |
| <i>CG8093</i>      | FBgn0033999 | <b>0.113</b> |              |              |              |
| <i>CG6277</i>      | FBgn0039475 | <b>0.107</b> |              |              |              |
| <i>w</i>           | FBgn0003996 | <b>0.079</b> | <b>4.39</b>  |              |              |
| <i>CG9452</i>      | FBgn0036877 | <b>0.073</b> |              |              |              |
| <i>CG18606</i>     | FBgn0034428 | <b>0.069</b> |              |              |              |
| <i>CG14406</i>     | FBgn0030595 | <b>0.061</b> | <b>0.314</b> |              |              |
| <i>CG2070</i>      | FBgn0033203 | <b>0.047</b> |              |              |              |
| <i>St2</i>         | FBgn0037665 | <b>0.045</b> |              |              |              |
| <i>e</i>           | FBgn0000527 | <b>0.042</b> | <b>2.93</b>  |              | <b>5.46</b>  |
| <b>proteolysis</b> |             |              |              |              |              |
| <i>hh</i>          | FBgn0004644 | <b>0.497</b> |              |              |              |
| <i>CG31778</i>     | FBgn0051778 | <b>0.483</b> |              |              |              |
| <i>S-Lap3</i>      | FBgn0045770 | <b>0.457</b> |              |              |              |
| <i>Rpt6R</i>       | FBgn0039788 | <b>0.451</b> | <b>36.11</b> |              |              |
| <i>Spn88Eb</i>     | FBgn0038299 | <b>0.451</b> | <b>6.72</b>  |              |              |
| <i>S-Lap2</i>      | FBgn0052351 | <b>0.451</b> |              |              |              |
| <i>CG8586</i>      | FBgn0033320 | <b>0.438</b> |              | <b>6.89</b>  |              |
| <i>Sb</i>          | FBgn0003319 | <b>0.432</b> |              |              |              |
| <i>Spn42Dd</i>     | FBgn0028988 | <b>0.426</b> | <b>0.341</b> |              |              |
| <i>CG11023</i>     | FBgn0031208 | <b>0.420</b> |              |              |              |
| <i>Sp7</i>         | FBgn0037515 | <b>0.401</b> |              |              | <b>0.466</b> |
| <i>CG10764</i>     | FBgn0034221 | <b>0.390</b> |              |              | <b>2.61</b>  |
| <i>Jon99Ci</i>     | FBgn0003358 | <b>0.376</b> | <b>2.55</b>  |              |              |
| <i>CG4408</i>      | FBgn0039073 | <b>0.374</b> | <b>0.260</b> |              |              |
| <i>CG8550</i>      | FBgn0033742 | <b>0.361</b> |              |              |              |
| <i>CG30289</i>     | FBgn0050289 | <b>0.354</b> | <b>0.151</b> |              |              |
| <i>CG9850</i>      | FBgn0034903 | <b>0.334</b> |              |              |              |
| <i>CG31777</i>     | FBgn0051777 | <b>0.323</b> | <b>2.75</b>  |              |              |

|                         |             |              |              |             |              |
|-------------------------|-------------|--------------|--------------|-------------|--------------|
| <i>CG4914</i>           | FBgn0036436 | <b>0.323</b> |              |             |              |
| <i>CG30288</i>          | FBgn0050288 | <b>0.312</b> | <b>0.407</b> |             |              |
| <i>CG9850</i>           | FBgn0034903 | <b>0.304</b> |              |             |              |
| <i>Nep2</i>             | FBgn0027570 | <b>0.283</b> |              | <b>4.58</b> |              |
| <i>NnaD</i>             | FBgn0265726 | <b>0.266</b> |              |             |              |
| <i>CG11529</i>          | FBgn0036264 | <b>0.255</b> |              |             |              |
| <i>CG3355</i>           | FBgn0031619 | <b>0.252</b> |              |             |              |
| <i>CG30098</i>          | FBgn0050098 | <b>0.250</b> |              |             |              |
| <i>SP1029</i>           | FBgn0263236 | <b>0.200</b> |              |             |              |
| <i>CG5470</i>           | FBgn0038384 | <b>0.199</b> |              |             |              |
| <i>CG30091</i>          | FBgn0050091 | <b>0.187</b> |              |             | <b>11.62</b> |
| <i>CG4650</i>           | FBgn0032549 | <b>0.173</b> | <b>3.36</b>  |             |              |
| <i>CG1773</i>           | FBgn0033439 | <b>0.168</b> | <b>0.148</b> |             |              |
| <i>CG3700</i>           | FBgn0034796 | <b>0.157</b> |              |             |              |
| <i>CG10073</i>          | FBgn0034440 | <b>0.154</b> |              |             |              |
| <i>CG3502</i>           | FBgn0046253 | <b>0.153</b> |              |             |              |
| <i>CG3097</i>           | FBgn0029804 | <b>0.149</b> |              |             |              |
| <i>CG7906</i>           | FBgn0036417 | <b>0.139</b> |              |             |              |
| <i>CG13748</i>          | FBgn0033355 | <b>0.133</b> |              |             |              |
| <i>CG7924</i>           | FBgn0036416 | <b>0.076</b> |              |             |              |
| <i>CG32762</i>          | FBgn0052762 | <b>0.067</b> |              |             |              |
| <i>CG11459</i>          | FBgn0037396 | <b>0.062</b> |              |             |              |
| <i>CG12951</i>          | FBgn0037677 | <b>0.062</b> |              |             |              |
| <b>signaling</b>        |             |              |              |             |              |
| <i>bib</i>              | FBgn0000180 | <b>0.493</b> |              |             |              |
| <i>SoxN</i>             | FBgn0029123 | <b>0.483</b> |              |             |              |
| <i>mthl5</i>            | FBgn0037960 | <b>0.476</b> |              |             | <b>2.17</b>  |
| <i>E(spl)m4-BFM</i>     | FBgn0002629 | <b>0.470</b> |              |             |              |
| <i>CG17760</i>          | FBgn0033756 | <b>0.412</b> | <b>3.33</b>  |             |              |
| <i>Tak1</i>             | FBgn0046689 | <b>0.366</b> |              |             |              |
| <i>CG6908</i>           | FBgn0037936 | <b>0.328</b> |              |             |              |
| <i>Wnt2</i>             | FBgn0004360 | <b>0.304</b> |              |             |              |
| <i>Buffy</i>            | FBgn0040491 | <b>0.297</b> | <b>0.258</b> |             |              |
| <i>CG9259</i>           | FBgn0032913 | <b>0.252</b> |              |             |              |
| <i>CG32447</i>          | FBgn0052447 | <b>0.228</b> |              |             |              |
| <i>CG31104</i>          | FBgn0051104 | <b>0.133</b> |              |             |              |
| <i>Obp83ef</i>          | FBgn0046876 | <b>0.063</b> | <b>0.106</b> |             |              |
| <i>CG11893</i>          | FBgn0039316 | <b>0.045</b> | <b>40.01</b> |             |              |
| <b>tissue structure</b> |             |              |              |             |              |
| <i>Cpr51A</i>           | FBgn0033942 | <b>0.486</b> | <b>0.121</b> |             |              |
| <i>Cpr12A</i>           | FBgn0030494 | <b>0.486</b> |              |             |              |
| <i>Sema-2b</i>          | FBgn0264273 | <b>0.476</b> |              |             |              |
| <i>Pcp</i>              | FBgn0003046 | <b>0.463</b> | <b>0.304</b> |             |              |
| <i>CG12009</i>          | FBgn0035430 | <b>0.438</b> |              |             |              |
| <i>a</i>                | FBgn0000008 | <b>0.420</b> |              |             |              |
| <i>CG11905</i>          | FBgn0036678 | <b>0.374</b> |              |             |              |
| <i>Ama</i>              | FBgn0000071 | <b>0.371</b> | <b>2.27</b>  | <b>2.31</b> | <b>3.01</b>  |
| <i>TwdlE</i>            | FBgn0031957 | <b>0.325</b> |              |             |              |
| <i>CG14957</i>          | FBgn0035412 | <b>0.270</b> |              |             |              |
| <i>b</i>                | FBgn0000153 | <b>0.250</b> |              |             |              |
| <i>Lcp65Ae</i>          | FBgn0020640 | <b>0.245</b> |              |             |              |
| <i>mey</i>              | FBgn0039851 | <b>0.235</b> |              |             |              |

|                         |             |              |              |             |             |
|-------------------------|-------------|--------------|--------------|-------------|-------------|
| <i>Lcp65Ad</i>          | FBgn0020641 | <b>0.230</b> |              |             |             |
| <i>Cpr65Ec</i>          | FBgn0035737 | <b>0.230</b> | <b>2.41</b>  |             |             |
| <i>Acp65Aa</i>          | FBgn0020765 | <b>0.224</b> |              |             |             |
| <i>CG5756</i>           | FBgn0034301 | <b>0.177</b> |              |             |             |
| <i>Cpr66Cb</i>          | FBgn0035875 | <b>0.138</b> |              |             |             |
| <i>CG14687</i>          | FBgn0037835 | <b>0.136</b> |              |             |             |
| <i>Muc68E</i>           | FBgn0053265 | <b>0.080</b> |              |             |             |
| <b>transport</b>        |             |              |              |             |             |
| <i>Porin2</i>           | FBgn0069354 | <b>0.493</b> |              |             |             |
| <i>CG7442</i>           | FBgn0037140 | <b>0.490</b> | <b>0.403</b> |             |             |
| <i>CG5805</i>           | FBgn0039223 | <b>0.486</b> |              |             |             |
| <i>CG31787</i>          | FBgn0051787 | <b>0.483</b> |              |             |             |
| <i>Syx13</i>            | FBgn0036341 | <b>0.480</b> |              |             |             |
| <i>Atet</i>             | FBgn0020762 | <b>0.470</b> |              |             | <b>2.06</b> |
| <i>CG8925</i>           | FBgn0038404 | <b>0.438</b> |              |             |             |
| <i>Orct</i>             | FBgn0019952 | <b>0.426</b> | <b>0.287</b> |             |             |
| <i>Tsp42Ek</i>          | FBgn0033133 | <b>0.418</b> |              |             |             |
| <i>CG14855</i>          | FBgn0038260 | <b>0.418</b> | <b>4.89</b>  |             |             |
| <i>CG7777</i>           | FBgn0033635 | <b>0.415</b> | <b>0.096</b> |             |             |
| <i>yin</i>              | FBgn0265575 | <b>0.398</b> |              | <b>2.05</b> |             |
| <i>Glut1</i>            | FBgn0264574 | <b>0.395</b> |              | <b>2.11</b> |             |
| <i>E23</i>              | FBgn0020445 | <b>0.384</b> | <b>0.156</b> |             |             |
| <i>CG17036</i>          | FBgn0032449 | <b>0.382</b> |              |             |             |
| <i>CG13426</i>          | FBgn0034510 | <b>0.356</b> |              |             |             |
| <i>ZnT35C</i>           | FBgn0028516 | <b>0.264</b> |              |             |             |
| <i>twz</i>              | FBgn0034636 | <b>0.232</b> |              |             | <b>4.25</b> |
| <i>CG3823</i>           | FBgn0029863 | <b>0.212</b> |              |             |             |
| <i>CG31636</i>          | FBgn0051636 | <b>0.210</b> |              |             |             |
| <i>CG2663</i>           | FBgn0037323 | <b>0.209</b> |              |             |             |
| <i>Oatp26F</i>          | FBgn0051634 | <b>0.193</b> |              |             |             |
| <i>CG1732</i>           | FBgn0039915 | <b>0.189</b> | <b>2.49</b>  |             |             |
| <i>bw</i>               | FBgn0000241 | <b>0.163</b> |              |             |             |
| <i>sut2</i>             | FBgn0028562 | <b>0.159</b> | <b>2.00</b>  |             |             |
| <i>CG3649</i>           | FBgn0034785 | <b>0.147</b> |              |             |             |
| <i>CG42269</i>          | FBgn0259164 | <b>0.111</b> |              |             |             |
| <b>unknown function</b> |             |              |              |             |             |
| <i>CG5780</i>           | FBgn0032446 | <b>0.500</b> |              |             |             |
| <i>CG15525</i>          | FBgn0039732 | <b>0.500</b> |              |             |             |
| <i>CG2837</i>           | FBgn0031646 | <b>0.497</b> |              |             |             |
| <i>CG6685</i>           | FBgn0036062 | <b>0.497</b> |              |             |             |
| <i>CG18249</i>          | FBgn0037553 | <b>0.497</b> |              |             |             |
| <i>CG12674</i>          | FBgn0031388 | <b>0.493</b> |              |             |             |
| <i>CG1124</i>           | FBgn0037290 | <b>0.493</b> |              |             | <b>5.25</b> |
| <i>CR6900</i>           | FBgn0030958 | <b>0.493</b> | <b>0.489</b> |             |             |
| <i>CG11882</i>          | FBgn0039642 | <b>0.490</b> |              |             |             |
| <i>CG5968</i>           | FBgn0032588 | <b>0.490</b> |              |             |             |
| <i>CG13962</i>          | FBgn0032824 | <b>0.490</b> | <b>2.09</b>  |             |             |
| <i>CG15210</i>          | FBgn0040850 | <b>0.490</b> | <b>0.350</b> |             |             |
| <i>CG9686</i>           | FBgn0030158 | <b>0.486</b> |              |             |             |
| HDC06936                |             | <b>0.483</b> | <b>0.432</b> |             |             |
| <i>CG31600</i>          | FBgn0051600 | <b>0.483</b> |              |             |             |
| <i>CG12880</i>          | FBgn0046258 | <b>0.483</b> |              |             |             |

|                  |             |              |              |             |              |
|------------------|-------------|--------------|--------------|-------------|--------------|
| <i>Atg18b</i>    | FBgn0032935 | <b>0.480</b> |              |             |              |
| <i>l(1)G0469</i> | FBgn0040153 | <b>0.480</b> |              |             |              |
| <i>CG6675</i>    | FBgn0032973 | <b>0.480</b> |              |             |              |
| <i>CG8031</i>    | FBgn0038110 | <b>0.480</b> | <b>0.390</b> |             |              |
| <i>CG3831</i>    | FBgn0034804 | <b>0.480</b> |              |             | <b>2.22</b>  |
| <i>IM18</i>      | FBgn0067903 | <b>0.480</b> |              |             |              |
| <i>CG10933</i>   | FBgn0034264 | <b>0.476</b> |              |             |              |
| <i>CG13905</i>   | FBgn0035176 | <b>0.473</b> |              |             |              |
| <i>MESK4</i>     | FBgn0043069 | <b>0.473</b> | <b>0.342</b> |             | <b>6.97</b>  |
| <i>Mur29B</i>    | FBgn0051901 | <b>0.470</b> |              |             |              |
| <i>CT36057</i>   |             | <b>0.470</b> |              |             |              |
| <i>CG13618</i>   | FBgn0039203 | <b>0.467</b> |              |             |              |
| <i>HDC06631</i>  |             | <b>0.467</b> | <b>2.80</b>  |             |              |
| <i>CT34146</i>   |             | <b>0.463</b> |              |             |              |
| <i>CG32023</i>   | FBgn0052023 | <b>0.460</b> |              |             |              |
| <i>LD44795</i>   | FBcl0167607 | <b>0.457</b> |              |             |              |
| <i>TwdIT</i>     | FBgn0029170 | <b>0.457</b> |              |             |              |
| <i>orb2</i>      | FBgn0264307 | <b>0.457</b> |              |             |              |
| <i>CG42269</i>   | FBgn0259164 | <b>0.457</b> |              |             |              |
| <i>CG1999</i>    | FBgn0029947 | <b>0.457</b> |              |             |              |
| <i>CG31323</i>   | FBgn0051323 | <b>0.457</b> | <b>0.254</b> |             |              |
| <i>CG13116</i>   | FBgn0032139 | <b>0.454</b> |              | <b>3.50</b> |              |
| <i>CG31324</i>   | FBgn0051324 | <b>0.454</b> |              |             |              |
| <i>CG5194</i>    | FBgn0035955 | <b>0.454</b> |              |             |              |
| <i>CG10912</i>   | FBgn0034296 | <b>0.448</b> |              |             |              |
| <i>CG33096</i>   | FBgn0053096 | <b>0.444</b> |              |             |              |
| <i>CG11275</i>   | FBgn0034706 | <b>0.444</b> | <b>0.279</b> |             |              |
| <i>CG18343</i>   | FBgn0033683 | <b>0.444</b> |              |             |              |
| <i>spz6</i>      | FBgn0035056 | <b>0.444</b> |              |             |              |
| <i>CG31538</i>   | FBgn0051538 | <b>0.444</b> |              |             |              |
| <i>CG11474</i>   | FBgn0034688 | <b>0.444</b> | <b>0.238</b> |             |              |
| <i>CG14567</i>   | FBgn0037126 | <b>0.441</b> | <b>0.369</b> |             |              |
| <i>CG9837</i>    | FBgn0037635 | <b>0.441</b> |              |             | <b>0.320</b> |
| <i>CG34424</i>   | FBgn0085453 | <b>0.441</b> |              |             |              |
| <i>CG13255</i>   | FBgn0040636 | <b>0.438</b> | <b>0.270</b> |             |              |
| <i>CG3223</i>    | FBgn0037538 | <b>0.438</b> |              |             |              |
| <i>CG32259</i>   | FBgn0052259 | <b>0.438</b> |              |             |              |
| <i>CG31861</i>   | FBgn0051861 | <b>0.432</b> |              |             |              |
| <i>CG13186</i>   | FBgn0033680 | <b>0.432</b> |              |             |              |
| <i>CG14109</i>   | FBgn0036364 | <b>0.432</b> | <b>8.40</b>  |             |              |
| <i>CIAPIN1</i>   | FBgn0001977 | <b>0.432</b> |              |             |              |
| <i>CG1273</i>    | FBgn0035522 | <b>0.429</b> |              |             |              |
| <i>CG33252</i>   | FBgn0053252 | <b>0.429</b> |              |             |              |
| <i>Gbp</i>       | FBgn0034199 | <b>0.429</b> |              | <b>8.40</b> | <b>2.72</b>  |
| <i>CG18190</i>   | FBgn0034403 | <b>0.429</b> | <b>8.35</b>  |             |              |
| <i>CG13488</i>   | FBgn0034670 | <b>0.426</b> |              |             |              |
| <i>CG8160</i>    | FBgn0034011 | <b>0.423</b> | <b>12.11</b> |             |              |
| <i>CG9801</i>    | FBgn0037623 | <b>0.423</b> | <b>0.360</b> |             | <b>4.13</b>  |
| <i>CG4438</i>    | FBgn0032115 | <b>0.423</b> |              |             |              |
| <i>CG14275</i>   | FBgn0032022 | <b>0.415</b> | <b>35.52</b> |             |              |
| <i>CG12655</i>   | FBgn0031080 | <b>0.406</b> | <b>7.38</b>  |             |              |
| <i>CG15544</i>   | FBgn0039804 | <b>0.406</b> |              |             | <b>2.40</b>  |

|                   |             |              |              |              |             |
|-------------------|-------------|--------------|--------------|--------------|-------------|
| <i>LP03188</i>    | FBcl0187891 | <b>0.406</b> |              |              |             |
| <i>CG15905</i>    | FBgn0034462 | <b>0.403</b> |              |              |             |
| <i>NnaD</i>       | FBgn0265726 | <b>0.401</b> |              |              |             |
| HDC12400          |             | <b>0.398</b> |              |              |             |
| <i>CG40294</i>    | FBgn0058294 | <b>0.398</b> |              |              |             |
| <i>CG7841</i>     | FBgn0036502 | <b>0.398</b> |              |              |             |
| <i>CG11737</i>    | FBgn0037592 | <b>0.395</b> |              |              |             |
| <i>CG31525</i>    | FBgn0051525 | <b>0.392</b> |              |              |             |
| <i>CG9040</i>     | FBgn0036394 | <b>0.392</b> | <b>4.54</b>  |              |             |
| CR_TC_GH03576     |             | <b>0.390</b> |              |              |             |
| <i>CG12470</i>    | FBgn0040371 | <b>0.387</b> |              |              |             |
| <i>Dtg</i>        | FBgn0038071 | <b>0.387</b> |              |              |             |
| <i>CG2444</i>     | FBgn0030326 | <b>0.384</b> |              |              |             |
| <i>nyo</i>        | FBgn0039852 | <b>0.374</b> |              |              |             |
| <i>CG15818</i>    | FBgn0031910 | <b>0.374</b> |              |              |             |
| <i>CG30417</i>    | FBgn0050417 | <b>0.371</b> |              |              |             |
| HDC14735          |             | <b>0.371</b> |              |              |             |
| <i>Ste</i>        | FBgn0003523 | <b>0.366</b> |              |              |             |
| <i>CG15068</i>    | FBgn0040733 | <b>0.363</b> | <b>14.12</b> |              |             |
| <i>RE54004</i>    | FBcl0204065 | <b>0.361</b> |              |              |             |
| DM.2L.4959        |             | <b>0.361</b> |              |              |             |
| <i>CG7778</i>     | FBgn0032025 | <b>0.356</b> |              |              |             |
| <i>CG2201</i>     | FBgn0032955 | <b>0.349</b> |              |              |             |
| <i>CG13856</i>    | FBgn0038959 | <b>0.342</b> |              |              |             |
| <i>CG32115</i>    | FBgn0052115 | <b>0.332</b> | <b>0.362</b> |              |             |
| <i>CG12481</i>    | FBgn0030542 | <b>0.325</b> |              |              |             |
| <i>CG13024</i>    | FBgn0036665 | <b>0.325</b> |              |              |             |
| <i>CG13082</i>    | FBgn0032803 | <b>0.321</b> |              |              |             |
| <i>CG1172</i>     | FBgn0264712 | <b>0.316</b> |              |              |             |
| <i>CG2082</i>     | FBgn0027608 | <b>0.314</b> | <b>0.284</b> |              |             |
| <i>CG15208</i>    | FBgn0030247 | <b>0.308</b> |              |              |             |
| <i>CG33143</i>    | FBgn0053143 | <b>0.304</b> |              |              |             |
| <i>CG15756</i>    | FBgn0030493 | <b>0.301</b> |              |              |             |
| <i>CG10516</i>    | FBgn0036549 | <b>0.293</b> |              |              | <b>2.10</b> |
| <i>CG18622</i>    | FBgn0038460 | <b>0.291</b> |              |              |             |
| <i>CG2082</i>     | FBgn0027608 | <b>0.289</b> | <b>0.284</b> |              |             |
| <i>CG2277</i>     | FBgn0035204 | <b>0.272</b> |              |              |             |
| <i>CG5391</i>     | FBgn0038943 | <b>0.268</b> |              |              |             |
| <i>CG8483</i>     | FBgn0038126 | <b>0.268</b> |              |              |             |
| <i>CG13722</i>    | FBgn0035553 | <b>0.238</b> |              |              |             |
| <i>CG13314</i>    | FBgn0035949 | <b>0.207</b> |              |              |             |
| <i>CG16836</i>    | FBgn0040735 | <b>0.207</b> | <b>20.27</b> |              |             |
| <i>CG16886</i>    | FBgn0028938 | <b>0.204</b> |              |              |             |
| <i>CG34296</i>    | FBgn0085325 | <b>0.132</b> |              |              |             |
| <i>CG4151</i>     | FBgn0029770 | <b>0.117</b> | <b>0.366</b> |              |             |
| <i>CR43242</i>    | FBgn0262887 | <b>0.097</b> |              | <b>0.252</b> |             |
| <i>pncr015:3L</i> | FBgn0063083 | <b>0.086</b> |              |              |             |
| <i>CG5697</i>     | FBgn0038846 | <b>0.045</b> |              |              |             |
| <i>CG9822</i>     | FBgn0034623 | <b>0.036</b> |              |              |             |
| <i>CG42717</i>    | FBgn0261634 | <b>0.032</b> |              |              |             |



Transcripts that are up- or down-regulated by homozygous null mutation of *Chd1* in L3 larvae or RNAi-mediated depletion of H1 in L3 salivary glands, HP1 in Kc cells and ISWI in SL2 cells. Fold change is calculated from Affymetrix microarray data relative to wild-type control.

**Table S3** Overlap of transcripts regulated by HP1, H1 and CHD1.

| SYMBOL/<br>TRANSCRIPT           | FLYBASE ID  | FOLD CHANGE   |              |              |
|---------------------------------|-------------|---------------|--------------|--------------|
|                                 |             | HP1 KD        | H1 KD        | <i>Chd1</i>  |
| <b>HP1 depletion effect: UP</b> |             |               |              |              |
| <i>CR31451</i>                  | FBgn0051451 | <b>181.09</b> | <b>8.26</b>  |              |
| <i>CG31140</i>                  | FBgn0051140 | <b>79.80</b>  | <b>6.31</b>  |              |
| <i>G6</i>                       | FBte0000958 | <b>67.66</b>  |              |              |
| <i>CG31642</i>                  | FBgn0051642 | <b>51.14</b>  |              | <b>0.435</b> |
| <i>AT07338</i>                  | FBcl0481740 | <b>50.00</b>  |              |              |
| <i>TART</i>                     |             | <b>35.15</b>  |              |              |
| <i>CG3635</i>                   | FBgn0032981 | <b>34.71</b>  | <b>6.77</b>  |              |
| <i>CG18605</i>                  | FBgn0034411 | <b>24.98</b>  |              |              |
| <i>Def</i>                      | FBgn0010385 | <b>22.33</b>  |              |              |
| <i>CG10126</i>                  | FBgn0038088 | <b>21.46</b>  |              |              |
| <i>springer</i>                 | FBte0000333 | <b>20.62</b>  |              |              |
| <i>CG17124</i>                  | FBgn0032297 | <b>20.00</b>  | <b>2.46</b>  |              |
| <i>gypsy6</i>                   | FBte0001175 | <b>19.16</b>  |              |              |
| <i>CG11714</i>                  | FBgn0036170 | <b>19.04</b>  | <b>3.88</b>  |              |
| <i>CG40295</i>                  | FBgn0058295 | <b>18.09</b>  | <b>11.97</b> |              |
| <i>HDC20537</i>                 |             | <b>16.14</b>  | <b>2.13</b>  |              |
| <i>CG5773</i>                   | FBgn0034290 | <b>15.22</b>  |              |              |
| <i>CG13795</i>                  | FBgn0031937 | <b>13.84</b>  |              |              |
| <i>CG5171</i>                   | FBgn0031907 | <b>12.85</b>  |              | <b>0.149</b> |
| <i>accord</i>                   | FBte0000956 | <b>11.76</b>  |              |              |
| <i>CG5399</i>                   | FBgn0038353 | <b>11.64</b>  | <b>28.01</b> | <b>2.06</b>  |
| <i>CG32091</i>                  | FBgn0052091 | <b>10.80</b>  |              |              |
| <i>edin</i>                     | FBgn0052185 | <b>10.48</b>  |              |              |
| <i>CG32032</i>                  | FBgn0043806 | <b>10.10</b>  |              |              |
| <i>gypsy2</i>                   | FBte0001040 | <b>9.84</b>   |              |              |
| <i>tok</i>                      | FBgn0004885 | <b>9.72</b>   | <b>2.11</b>  |              |
| <i>CG9691</i>                   | FBgn0030160 | <b>9.48</b>   |              |              |
| <i>Yp3</i>                      | FBgn0004047 | <b>9.00</b>   |              | <b>0.180</b> |
| <i>invader3</i>                 | FBte0000619 | <b>8.99</b>   |              |              |
| <i>CG13315</i>                  | FBgn0040827 | <b>8.90</b>   |              |              |
| <i>CG3961</i>                   | FBgn0036821 | <b>8.86</b>   |              |              |
| <i>CAH1</i>                     | FBgn0027844 | <b>8.65</b>   | <b>2.25</b>  | <b>0.493</b> |
| <i>AttC</i>                     | FBgn0041579 | <b>8.50</b>   |              |              |
| <i>gypsy</i>                    | FBte0000021 | <b>8.45</b>   |              |              |
| <i>Cyp6a13</i>                  | FBgn0033304 | <b>8.40</b>   | <b>5.64</b>  |              |
| <i>Drs</i>                      | FBgn0010381 | <b>8.33</b>   | <b>4.28</b>  | <b>0.451</b> |
| <i>ldgf1</i>                    | FBgn0020416 | <b>8.29</b>   |              |              |
| <i>Cyp12e1</i>                  | FBgn0037817 | <b>8.15</b>   |              |              |
| <i>HMS-Beagle</i>               | FBte0000726 | <b>7.86</b>   |              |              |
| <i>CG33775</i>                  | FBgn0053775 | <b>7.68</b>   |              |              |
| <i>KCNQ</i>                     | FBgn0033494 | <b>7.66</b>   |              |              |
| <i>Gpb5</i>                     | FBgn0063368 | <b>7.47</b>   |              |              |
| <i>Gr94a</i>                    | FBgn0041225 | <b>7.33</b>   | <b>5.19</b>  |              |
| <i>CG33468</i>                  | FBgn0053468 | <b>7.30</b>   | <b>4.91</b>  | <b>2.46</b>  |
| <i>CG4752</i>                   | FBgn0034733 | <b>7.25</b>   |              |              |
| <i>CG9981</i>                   | FBgn0030746 | <b>7.06</b>   |              | <b>2.77</b>  |
| <i>aret</i>                     | FBgn0000114 | <b>6.89</b>   |              |              |

|                    |             |      |       |       |
|--------------------|-------------|------|-------|-------|
| CG45057            | FBgn0266417 | 6.74 | 2.20  |       |
| <i>Cyp6d4</i>      | FBgn0039006 | 6.66 |       |       |
| CG40115            | FBgn0058115 | 6.47 | 10.26 |       |
| HDC20531           |             | 6.34 |       |       |
| <i>Sid</i>         | FBgn0039593 | 6.31 |       | 0.261 |
| CT39784            |             | 6.11 | 14.84 |       |
| HDC20523           |             | 6.01 | 2.81  |       |
| CG11672            | FBgn0037563 | 5.98 |       |       |
| <i>Tsf3</i>        | FBgn0034094 | 5.89 |       |       |
| <i>Rh4</i>         | FBgn0003250 | 5.82 |       |       |
| CG10877            | FBgn0038804 | 5.73 | 0.157 |       |
| CG9717             | FBgn0039789 | 5.71 |       |       |
| CG18473            | FBgn0037683 | 5.69 | 3.14  |       |
| <i>bru-3</i>       | FBgn0264001 | 5.67 |       |       |
| <i>rau</i>         | FBgn0031745 | 5.63 |       |       |
| CG15661            | FBgn0034605 | 5.55 | 12.72 |       |
| <i>Gbp</i>         | FBgn0034199 | 5.52 |       | 0.429 |
| CG3940             | FBgn0037788 | 5.43 |       | 0.356 |
| CG10799            | FBgn0033821 | 5.41 | 3.26  |       |
| PGRP-SD            | FBgn0035806 | 5.40 |       |       |
| PGRP-SC2           | FBgn0043575 | 5.39 | 2.66  | 0.222 |
| <i>Cyp12e1</i>     | FBgn0037817 | 5.34 |       |       |
| CG14164            | FBgn0036057 | 5.31 |       |       |
| <i>AttA</i>        | FBgn0012042 | 5.30 |       | 0.337 |
| CG4928             | FBgn0027556 | 5.30 | 0.315 |       |
| CG14695            | FBgn0037850 | 5.29 |       |       |
| <i>Zasp52</i>      | FBgn0265991 | 5.26 | 0.492 |       |
| CG5367             | FBgn0032228 | 5.24 |       |       |
| CG18446            | FBgn0033458 | 5.20 | 2.05  | 0.395 |
| <i>Mct1</i>        | FBgn0023549 | 5.19 | 0.395 |       |
| invader4           | FBte0000292 | 5.17 |       |       |
| <i>Pka-C3</i>      | FBgn0000489 | 5.16 |       |       |
| CG17124            | FBgn0032297 | 5.14 | 4.46  |       |
| CG9919             | FBgn0030742 | 5.13 |       |       |
| SPH93              | FBgn0032638 | 5.12 | 11.67 |       |
| <i>Corp</i>        | FBgn0030028 | 5.08 | 4.57  |       |
| <i>Apoltp</i>      | FBgn0032136 | 5.06 | 2.89  | 5.70  |
| <i>spir</i>        | FBgn0003475 | 5.06 |       |       |
| CG8586             | FBgn0033320 | 5.03 |       | 0.438 |
| CG11052            | FBgn0040524 | 5.03 |       |       |
| <i>yin</i>         | FBgn0265575 | 5.00 | 0.449 | 0.398 |
| CG43110            | FBgn0262570 | 4.99 | 0.432 |       |
| <i>Cyp9c1</i>      | FBgn0015040 | 4.93 |       | 3.41  |
| CG5381             | FBgn0032218 | 4.85 |       |       |
| CG32687            | FBgn0052687 | 4.82 | 2.09  |       |
| <i>Cad96Ca</i>     | FBgn0022800 | 4.81 |       |       |
| <i>Tsp2A</i>       | FBgn0024361 | 4.77 |       |       |
| <i>Cyp28d1</i>     | FBgn0031689 | 4.76 |       |       |
| <i>Mctp</i>        | FBgn0034389 | 4.72 | 0.300 | 2.95  |
| <i>Ama</i>         | FBgn0000071 | 4.72 | 2.27  | 0.371 |
| <i>Jheh3</i>       | FBgn0034406 | 4.69 |       | 2.68  |
| <i>alphaTub67C</i> | FBgn0087040 | 4.63 |       |       |

|             |             |      |       |       |
|-------------|-------------|------|-------|-------|
| CG5731      | FBgn0032192 | 4.60 | 2.72  |       |
| GstE3       | FBgn0063497 | 4.59 |       | 0.432 |
| CG40124     | FBgn0058124 | 4.58 | 11.10 |       |
| CG5853      | FBgn0032167 | 4.57 |       |       |
| CT39116     |             | 4.56 | 103.1 |       |
| CG14606     | FBgn0037485 | 4.54 |       |       |
| shf         | FBgn0003390 | 4.52 | 2.97  |       |
| CG1294      | FBgn0033030 | 4.49 | 4.55  |       |
| ItgalphaPS4 | FBgn0034005 | 4.49 | 3.91  |       |
| PGRP-SA     | FBgn0030310 | 4.46 | 2.20  |       |
| Cyp4p3      | FBgn0033397 | 4.43 | 9.73  | 8.75  |
| CG6709      | FBgn0036056 | 4.43 | 2.66  |       |
| HDC20116    |             | 4.41 |       |       |
| Cyp12a5     | FBgn0038680 | 4.30 |       |       |
| CG12698     | FBgn0030721 | 4.26 |       |       |
| CG9170      | FBgn0030716 | 4.26 | 3.83  |       |
| qbert       |             | 4.26 |       |       |
| RpS5b       | FBgn0038277 | 4.25 |       |       |
| AttB        | FBgn0041581 | 4.22 |       |       |
| Hf          | FBgn0014000 | 4.22 |       |       |
| l(3)neo38   | FBgn0265276 | 4.17 |       |       |
| HDC20280    |             | 4.17 |       |       |
| CG6330      | FBgn0039464 | 4.15 |       |       |
| beat-IIIc   | FBgn0032629 | 4.13 | 2.39  |       |
| alphaTub85E | FBgn0003886 | 4.12 |       |       |
| Swim        | FBgn0034709 | 4.11 | 9.06  |       |
| Mal-A5      | FBgn0050359 | 4.11 |       |       |
| GstE11      | FBgn0034354 | 4.06 | 0.341 |       |
| CG2930      | FBgn0028491 | 4.06 |       |       |
| Eip78C      | FBgn0004865 | 4.04 | 0.136 | 0.144 |
| Epac        | FBgn0085421 | 4.01 | 9.43  |       |
| CG3246      | FBgn0031538 | 4.00 |       |       |
| TpnC4       | FBgn0033027 | 4.00 | 3.70  |       |
| TART        |             | 3.97 |       |       |
| Myo28B1     | FBgn0040299 | 3.95 | 2.21  |       |
| CG14451     | FBgn0037183 | 3.94 |       |       |
| kek1        | FBgn0015399 | 3.90 | 5.43  |       |
| Esyt2       | FBgn0266758 | 3.88 |       |       |
| CG13117     | FBgn0032140 | 3.85 | 2.71  |       |
| CG40274     | FBgn0058274 | 3.85 | 5.22  |       |
| micropia    | FBte0000042 | 3.83 |       |       |
| CG5322      | FBgn0032253 | 3.80 |       |       |
| CG11400     | FBgn0034198 | 3.78 | 19.24 |       |
| CG16947     | FBgn0031816 | 3.78 | 0.285 |       |
| GATE        | FBte0000359 | 3.78 |       |       |
| NT5E-2      | FBgn0050104 | 3.76 | 0.196 |       |
| CG9150      | FBgn0031775 | 3.72 |       |       |
| spir        | FBgn0003475 | 3.67 |       |       |
| lr41a       | FBgn0040849 | 3.67 |       |       |
| Tsp42Ed     | FBgn0029507 | 3.66 |       |       |
| l(3)neo38   | FBgn0265276 | 3.65 |       |       |
| l(3)neo38   | FBgn0265276 | 3.65 |       |       |

|            |             |      |       |       |
|------------|-------------|------|-------|-------|
| CG12868    | FBgn0033945 | 3.64 | 2.74  |       |
| CG17032    | FBgn0036547 | 3.63 |       |       |
| CG31272    | FBgn0051272 | 3.62 |       |       |
| Hsp68      | FBgn0001230 | 3.60 |       |       |
| loh        | FBgn0032252 | 3.59 | 2.15  |       |
| Tl         | FBgn0262473 | 3.58 | 2.30  |       |
| sdk        | FBgn0021764 | 3.58 |       |       |
| CG4301     | FBgn0030747 | 3.58 |       |       |
| aret       | FBgn0000114 | 3.58 |       |       |
| rdgB       | FBgn0003218 | 3.58 |       |       |
| bgm        | FBgn0027348 | 3.58 | 4.62  |       |
| vir-1      | FBgn0043841 | 3.56 | 8.76  |       |
| CG43658    | FBgn0263706 | 3.53 |       |       |
| LysX       | FBgn0004431 | 3.51 | 33.21 | 0.344 |
| eIF4E-6    | FBgn0039622 | 3.50 |       |       |
| fend       | FBgn0030090 | 3.47 | 3.52  |       |
| CG3679     | FBgn0027521 | 3.43 | 4.21  |       |
| wrapper    | FBgn0025878 | 3.42 |       |       |
| Glut1      | FBgn0264574 | 3.36 | 0.312 | 0.395 |
| CG34232    | FBgn0085261 | 3.35 |       |       |
| CG12926    | FBgn0033437 | 3.34 | 0.415 |       |
| HDC20112   |             | 3.32 |       |       |
| HMS-Beagle | FBte0000726 | 3.32 |       |       |
| Pepck      | FBgn0003067 | 3.29 |       | 2.30  |
| Mtk        | FBgn0014865 | 3.29 |       | 0.438 |
| Listericin | FBgn0033593 | 3.28 |       |       |
| Ugt35a     | FBgn0026315 | 3.27 | 3.35  | 2.53  |
| Ndae1      | FBgn0259111 | 3.26 |       | 2.10  |
| rdgB       | FBgn0003218 | 3.26 |       |       |
| CG4269     | FBgn0034741 | 3.25 |       |       |
| sda        | FBgn0015541 | 3.24 |       |       |
| CG17207    | FBgn0038051 | 3.24 |       |       |
| mthl14     | FBgn0052476 | 3.23 | 15.70 |       |
| Spn31A     | FBgn0032178 | 3.22 |       |       |
| CG5096     | FBgn0032235 | 3.19 | 3.96  |       |
| nerfin-2   | FBgn0041105 | 3.18 |       |       |
| CG10405    | FBgn0038431 | 3.16 |       |       |
| hiw        | FBgn0030600 | 3.15 |       |       |
| Arc1       | FBgn0033926 | 3.15 |       |       |
| CG6357     | FBgn0033875 | 3.14 | 10.96 |       |
| Nep2       | FBgn0027570 | 3.13 |       | 0.283 |
| d          | FBgn0262029 | 3.13 |       |       |
| AttD       | FBgn0038530 | 3.13 | 72.76 |       |
| Fie        | FBgn0026592 | 3.12 | 2.46  |       |
| CG40040    | FBgn0058040 | 3.10 |       |       |
| l(3)neo38  | FBgn0265276 | 3.10 |       |       |
| CG32625    | FBgn0052625 | 3.09 | 39.17 |       |
| CG9360     | FBgn0030332 | 3.06 | 10.35 |       |
| CG3568     | FBgn0029710 | 3.03 |       |       |
| CG31626    | FBgn0051626 | 3.00 | 19.15 |       |
| CG32313    | FBgn0052313 | 3.00 |       |       |
| spir       | FBgn0003475 | 3.00 | 2.15  |       |

|                     |             |             |              |             |
|---------------------|-------------|-------------|--------------|-------------|
| <i>tyn</i>          | FBgn0029128 | <b>3.00</b> |              |             |
| <i>hdm</i>          | FBgn0029977 | <b>2.98</b> |              |             |
| <i>CG42822</i>      | FBgn0262004 | <b>2.98</b> |              |             |
| <i>CG32944</i>      | FBgn0052944 | <b>2.97</b> |              |             |
| <i>CG33346</i>      | FBgn0053346 | <b>2.97</b> |              |             |
| <i>alpha-Est3</i>   | FBgn0015571 | <b>2.97</b> |              |             |
| <i>CG5191</i>       | FBgn0038803 | <b>2.97</b> | <b>0.403</b> |             |
| <i>CG4297</i>       | FBgn0031258 | <b>2.97</b> | <b>0.429</b> |             |
| <i>dys</i>          | FBgn0039411 | <b>2.96</b> |              |             |
| <i>Ef1alpha100E</i> | FBgn0000557 | <b>2.95</b> |              |             |
| <i>QC</i>           | FBgn0052412 | <b>2.95</b> |              |             |
| <i>stv</i>          | FBgn0086708 | <b>2.94</b> |              | <b>2.53</b> |
| <i>ZnT77C</i>       | FBgn0037000 | <b>2.92</b> |              |             |
| <i>CG8738</i>       | FBgn0033321 | <b>2.91</b> |              |             |
| <i>CG3251</i>       | FBgn0031622 | <b>2.90</b> |              |             |
| <i>d</i>            | FBgn0262029 | <b>2.90</b> |              |             |
| <i>ldgf2</i>        | FBgn0020415 | <b>2.90</b> | <b>2.56</b>  |             |
| <i>CG33494</i>      | FBgn0053494 | <b>2.89</b> |              |             |
| <i>CG16749</i>      | FBgn0037678 | <b>2.88</b> |              |             |
| <i>HDC20377</i>     |             | <b>2.86</b> |              |             |
| <i>CG33144</i>      | FBgn0053144 | <b>2.86</b> |              |             |
| <i>Mdr49</i>        | FBgn0004512 | <b>2.86</b> | <b>3.38</b>  |             |
| <i>Cyp6a8</i>       | FBgn0013772 | <b>2.83</b> |              |             |
| <i>Cyp6a2</i>       | FBgn0000473 | <b>2.80</b> |              | <b>30.5</b> |
| <i>RapGAP1</i>      | FBgn0264895 | <b>2.80</b> | <b>0.339</b> |             |
| <i>CG6495</i>       | FBgn0027550 | <b>2.80</b> |              |             |
| <i>CG32982</i>      | FBgn0052982 | <b>2.79</b> | <b>2.33</b>  |             |
| <i>Cyp4p1</i>       | FBgn0015037 | <b>2.79</b> |              |             |
| <i>GstD5</i>        | FBgn0010041 | <b>2.78</b> | <b>20.38</b> |             |
| <i>Het-A</i>        |             | <b>2.75</b> |              |             |
| <i>Kaz1-ORFB</i>    | FBgn0063923 | <b>2.75</b> | <b>4.27</b>  |             |
| <i>CG30456</i>      | FBgn0050456 | <b>2.74</b> |              |             |
| <i>wisp</i>         | FBgn0260780 | <b>2.74</b> |              |             |
| <i>CG8349</i>       | FBgn0032003 | <b>2.73</b> |              |             |
| <i>CHKov2</i>       | FBgn0039328 | <b>2.72</b> |              |             |
| <i>CG8046</i>       | FBgn0033388 | <b>2.71</b> |              |             |
| <i>R1</i>           |             | <b>2.71</b> |              |             |
| <i>Rbf</i>          | FBgn0015799 | <b>2.71</b> |              |             |
| <i>CG4741</i>       | FBgn0035040 | <b>2.70</b> |              |             |
| <i>CG2217</i>       | FBgn0027544 | <b>2.69</b> | <b>0.431</b> |             |
| <i>Ugt86Da</i>      | FBgn0040259 | <b>2.68</b> | <b>8.97</b>  | <b>2.28</b> |
| <i>btn</i>          | FBgn0014949 | <b>2.68</b> |              |             |
| <i>Jhl-26</i>       | FBgn0028424 | <b>2.68</b> | <b>7.00</b>  | <b>3.84</b> |
| <i>AOX1</i>         | FBgn0267408 | <b>2.67</b> | <b>14.75</b> | <b>2.60</b> |
| <i>stai</i>         | FBgn0266521 | <b>2.67</b> |              |             |
| <i>lr41a</i>        | FBgn0040849 | <b>2.66</b> |              |             |
| <i>Ugt86Dd</i>      | FBgn0040256 | <b>2.65</b> | <b>4.15</b>  |             |
| <i>PKD</i>          | FBgn0038603 | <b>2.65</b> |              | <b>2.04</b> |
| <i>Thor</i>         | FBgn0261560 | <b>2.63</b> |              |             |
| <i>CG4398</i>       | FBgn0034126 | <b>2.62</b> | <b>0.052</b> |             |
| <i>CG14692</i>      | FBgn0037836 | <b>2.61</b> |              |             |
| <i>CG16712</i>      | FBgn0031561 | <b>2.60</b> | <b>7.20</b>  | <b>2.48</b> |

|                 |             |      |       |       |
|-----------------|-------------|------|-------|-------|
| <i>Arc1</i>     | FBgn0033926 | 2.59 | 5.93  |       |
| <i>Rhp</i>      | FBgn0026374 | 2.57 | 0.328 |       |
| <i>COX7AL</i>   | FBgn0037579 | 2.57 |       |       |
| <i>CG8066</i>   | FBgn0038243 | 2.56 | 5.94  |       |
| <i>Muc14A</i>   | FBgn0052580 | 2.56 |       |       |
| <i>CG15611</i>  | FBgn0034194 | 2.56 |       |       |
| <i>Gs2</i>      | FBgn0001145 | 2.55 | 3.09  |       |
| <i>CG33784</i>  | FBgn0053784 | 2.55 |       |       |
| <i>KFase</i>    | FBgn0031821 | 2.53 |       |       |
| <i>Gnmt</i>     | FBgn0038074 | 2.53 | 8.13  |       |
| <i>CG17549</i>  | FBgn0032774 | 2.52 |       |       |
| <i>pirk</i>     | FBgn0034647 | 2.51 |       |       |
| <i>Doc2</i>     | FBgn0035956 | 2.50 |       |       |
| <i>Hsp67Bc</i>  | FBgn0001229 | 2.49 | 2.74  | 0.200 |
| <i>egr</i>      | FBgn0033483 | 2.49 |       |       |
| <i>CG7191</i>   | FBgn0031945 | 2.48 |       |       |
| <i>CG3397</i>   | FBgn0037975 | 2.48 |       | 0.162 |
| <i>GstE7</i>    | FBgn0063493 | 2.48 |       | 8.94  |
| <i>GstE10</i>   | FBgn0063499 | 2.48 |       |       |
| <i>CG11897</i>  | FBgn0039644 | 2.48 | 5.52  | 2.14  |
| <i>ome</i>      | FBgn0259175 | 2.47 |       |       |
| <i>CG30022</i>  | FBgn0050022 | 2.47 |       |       |
| <i>CG8008</i>   | FBgn0033387 | 2.46 |       |       |
| <i>CG4822</i>   | FBgn0031220 | 2.45 | 0.410 |       |
| <i>CG5783</i>   | FBgn0032670 | 2.45 | 0.388 |       |
| <i>spri</i>     | FBgn0085443 | 2.45 |       |       |
| <i>Traf4</i>    | FBgn0026319 | 2.44 |       |       |
| <i>CG4829</i>   | FBgn0030796 | 2.43 |       |       |
| <i>be</i>       | FBgn0052594 | 2.42 |       |       |
| <i>CG8870</i>   | FBgn0038144 | 2.41 |       |       |
| <i>Ptth</i>     | FBgn0013323 | 2.39 |       |       |
| <i>KP78b</i>    | FBgn0026063 | 2.38 | 6.25  |       |
| <i>CG14692</i>  | FBgn0037836 | 2.38 |       |       |
| <i>Ror</i>      | FBgn0010407 | 2.38 |       |       |
| <i>CG14642</i>  | FBgn0037222 | 2.37 | 3.23  |       |
| <i>pdm3</i>     | FBgn0261588 | 2.37 |       |       |
| <i>CG17029</i>  | FBgn0036551 | 2.37 |       |       |
| <i>CG1358</i>   | FBgn0033196 | 2.36 |       |       |
| <i>CG13813</i>  | FBgn0036956 | 2.36 |       |       |
| <i>egr</i>      | FBgn0033483 | 2.36 |       |       |
| <i>Inx3</i>     | FBgn0265274 | 2.35 |       |       |
| <i>HDC20468</i> |             | 2.35 | 8.59  |       |
| <i>CG6287</i>   | FBgn0032350 | 2.35 |       | 0.382 |
| <i>CG43064</i>  | FBgn0262366 | 2.34 |       |       |
| <i>Pask</i>     | FBgn0034950 | 2.32 |       |       |
| <i>DptB</i>     | FBgn0034407 | 2.32 |       |       |
| <i>CG32521</i>  | FBgn0052521 | 2.32 |       |       |
| <i>mtt</i>      | FBgn0050361 | 2.32 |       |       |
| <i>Mef2</i>     | FBgn0011656 | 2.32 |       |       |
| <i>CG30022</i>  | FBgn0050022 | 2.31 |       |       |
| <i>CG18547</i>  | FBgn0037973 | 2.30 | 4.73  |       |
| <i>Mmp1</i>     | FBgn0035049 | 2.30 | 15.55 | 0.264 |

|                   |             |      |       |       |
|-------------------|-------------|------|-------|-------|
| <i>GstD2</i>      | FBgn0010038 | 2.30 | 9.61  | 0.235 |
| <i>Nha2</i>       | FBgn0263390 | 2.29 | 2.28  | 6.11  |
| <i>IP3K2</i>      | FBgn0266375 | 2.29 |       |       |
| <i>CG13116</i>    | FBgn0032139 | 2.29 |       | 0.454 |
| <i>Sip1</i>       | FBgn0010620 | 2.29 | 0.396 |       |
| <i>CG4502</i>     | FBgn0031896 | 2.28 |       |       |
| <i>Ect4</i>       | FBgn0262579 | 2.28 |       | 2.06  |
| <i>yellow-f</i>   | FBgn0041710 | 2.27 | 0.330 | 0.358 |
| <i>CG31743</i>    | FBgn0032618 | 2.27 |       | 2.60  |
| <i>tilB</i>       | FBgn0014395 | 2.27 |       |       |
| <i>CG13893</i>    | FBgn0035146 | 2.27 |       |       |
| <i>l(2)03659</i>  | FBgn0010549 | 2.26 | 3.15  |       |
| <i>CR32207</i>    | FBgn0052207 | 2.26 | 12.38 |       |
| <i>GstE2</i>      | FBgn0063498 | 2.25 |       |       |
| <i>CG7255</i>     | FBgn0036493 | 2.24 | 0.448 |       |
| <i>CG31253</i>    | FBgn0051253 | 2.24 |       |       |
| <i>eater</i>      | FBgn0243514 | 2.24 | 8.00  |       |
| <i>HDC20224</i>   |             | 2.23 | 5.63  |       |
| <i>CG7203</i>     | FBgn0031942 | 2.23 |       |       |
| <i>CG13912</i>    | FBgn0035186 | 2.23 |       | 2.27  |
| <i>CG42240</i>    | FBgn0250869 | 2.23 | 0.403 |       |
| <i>CG13698</i>    | FBgn0036773 | 2.23 |       |       |
| <i>CG11686</i>    | FBgn0040551 | 2.22 |       |       |
| <i>CG44325</i>    | FBgn0265413 | 2.21 |       |       |
| <i>rst</i>        | FBgn0003285 | 2.21 | 13.17 |       |
| <i>GstT4</i>      | FBgn0030484 | 2.21 | 2.14  | 2.11  |
| <i>CG7627</i>     | FBgn0032026 | 2.21 |       |       |
| <i>IP3K2</i>      | FBgn0266375 | 2.21 |       |       |
| <i>CG30485</i>    | FBgn0050485 | 2.20 |       |       |
| <i>CG31038</i>    | FBgn0051038 | 2.20 |       |       |
| <i>regucalcin</i> | FBgn0030362 | 2.20 |       |       |
| <i>CG14857</i>    | FBgn0038262 | 2.20 |       |       |
| <i>GlyP</i>       | FBgn0004507 | 2.19 |       |       |
| <i>Lsd-1</i>      | FBgn0039114 | 2.19 |       |       |
| <i>CG3168</i>     | FBgn0029896 | 2.19 |       |       |
| <i>Dyrk2</i>      | FBgn0016930 | 2.18 |       | 0.448 |
| <i>Tsp42Ea</i>    | FBgn0029508 | 2.17 |       |       |
| <i>CG18063</i>    | FBgn0028856 | 2.17 |       |       |
| <i>dnr1</i>       | FBgn0260866 | 2.17 |       |       |
| <i>Rab23</i>      | FBgn0037364 | 2.16 | 3.31  |       |
| <i>CG4404</i>     | FBgn0030432 | 2.16 | 2.28  |       |
| <i>CG14291</i>    | FBgn0038660 | 2.16 |       |       |
| <i>bbg</i>        | FBgn0087007 | 2.15 | 0.392 |       |
| <i>Hsp23</i>      | FBgn0001224 | 2.15 |       |       |
| <i>clos</i>       | FBgn0261016 | 2.15 |       |       |
| <i>CG32368</i>    | FBgn0052368 | 2.13 |       |       |
| <i>CG43164</i>    | FBgn0262720 | 2.12 |       |       |
| <i>CG13654</i>    | FBgn0039290 | 2.12 | 2.49  |       |
| <i>CG12428</i>    | FBgn0039543 | 2.12 |       |       |
| <i>sick</i>       | FBgn0263873 | 2.11 |       |       |
| <i>CG31436</i>    | FBgn0051436 | 2.11 |       |       |
| <i>CG44251</i>    | FBgn0265186 | 2.11 | 2.21  |       |



|                                   |             |       |       |       |
|-----------------------------------|-------------|-------|-------|-------|
| <i>Inx2</i>                       | FBgn0027108 | 2.11  |       |       |
| <i>CG2065</i>                     | FBgn0033204 | 2.11  | 9.00  | 0.163 |
| <i>CDase</i>                      | FBgn0039774 | 2.10  | 2.07  |       |
| <i>PGRP-SB1</i>                   | FBgn0043578 | 2.10  |       | 0.108 |
| <i>CG12825</i>                    | FBgn0033221 | 2.10  | 2.64  |       |
| <i>brp</i>                        | FBgn0259246 | 2.09  |       |       |
| <i>CG13650</i>                    | FBgn0039277 | 2.08  |       |       |
| <i>MESK2</i>                      | FBgn0043070 | 2.08  |       |       |
| <i>CG31274</i>                    | FBgn0051274 | 2.08  | 0.326 | 0.418 |
| <i>CG10283</i>                    | FBgn0032681 | 2.08  |       |       |
| <i>ebd2</i>                       | FBgn0037076 | 2.08  |       |       |
| <i>Ela</i>                        | FBgn0013949 | 2.08  |       |       |
| <i>pyd</i>                        | FBgn0262614 | 2.06  |       |       |
| <i>CG6231</i>                     | FBgn0038720 | 2.06  |       |       |
| <i>CecB</i>                       | FBgn0000278 | 2.06  |       |       |
| <i>CG14636</i>                    | FBgn0037217 | 2.05  | 0.355 |       |
| <i>veil</i>                       | FBgn0034225 | 2.05  |       |       |
| <i>CG43340</i>                    | FBgn0263077 | 2.05  |       | 2.22  |
| <i>CG30460</i>                    | FBgn0050460 | 2.05  |       |       |
| <i>Cyp6d5</i>                     | FBgn0038194 | 2.05  |       | 0.490 |
| <i>CG31705</i>                    | FBgn0028490 | 2.05  |       |       |
| <i>PGRP-LA</i>                    | FBgn0035975 | 2.05  |       |       |
| <i>CG6701</i>                     | FBgn0033889 | 2.05  |       |       |
| <i>GstD9</i>                      | FBgn0038020 | 2.04  |       |       |
| <i>pdgy</i>                       | FBgn0027601 | 2.03  |       |       |
| <i>spri</i>                       | FBgn0085443 | 2.03  |       |       |
| <i>mlt</i>                        | FBgn0265512 | 2.03  | 4.24  |       |
| <i>GstE6</i>                      | FBgn0063494 | 2.03  | 43.50 | 4.17  |
| <i>CG32436</i>                    | FBgn0052436 | 2.03  |       |       |
| <i>Cyp4e2</i>                     | FBgn0014469 | 2.03  |       |       |
| <i>Gel</i>                        | FBgn0010225 | 2.02  |       |       |
| <i>Sans</i>                       | FBgn0033785 | 2.02  |       |       |
| <i>Tep4</i>                       | FBgn0041180 | 2.02  | 3.86  |       |
| <i>fat-spondin</i>                | FBgn0026721 | 2.01  |       |       |
| <i>HDC03722</i>                   |             | 2.00  |       |       |
| <i>HP1D3csd</i>                   | FBgn0030994 | 2.00  |       |       |
| <i>su(r)</i>                      | FBgn0086450 | 2.00  | 3.20  | 2.17  |
| <i>lh</i>                         | FBgn0263397 | 2.00  | 2.34  |       |
| <b>HP1 depletion effect: DOWN</b> |             |       |       |       |
| <i>CG32850</i>                    | FBgn0052850 | 0.498 | 4.43  |       |
| <i>CG41128</i>                    | FBgn0069923 | 0.490 | 0.338 |       |
| <i>CG3262</i>                     | FBgn0032986 | 0.486 |       |       |
| <i>Dbp80</i>                      | FBgn0024804 | 0.480 |       |       |
| <i>CG32350</i>                    | FBgn0052350 | 0.480 |       |       |
| <i>Acf1</i>                       | FBgn0027620 | 0.480 |       |       |
| <i>Fas2</i>                       | FBgn0000635 | 0.479 |       | 2.11  |
| <i>ND-AGGG</i>                    | FBgn0058002 | 0.477 |       |       |
| <i>PlexB</i>                      | FBgn0025740 | 0.474 |       |       |
| <i>COX4L</i>                      | FBgn0033020 | 0.464 |       |       |
| <i>PlexB</i>                      | FBgn0025740 | 0.455 |       |       |
| <i>CG34330</i>                    | FBgn0085359 | 0.452 | 4.33  |       |
| <i>CG6329</i>                     | FBgn0033872 | 0.435 |       |       |

|                   |             |              |              |              |
|-------------------|-------------|--------------|--------------|--------------|
| <i>Nipped-A</i>   | FBgn0053554 | <b>0.430</b> |              |              |
| <i>CG2709</i>     | FBgn0024977 | <b>0.425</b> |              |              |
| <i>l(2)41Ab</i>   | FBgn0262123 | <b>0.417</b> | <b>4.24</b>  |              |
| <i>dob</i>        | FBgn0030607 | <b>0.402</b> | <b>3.62</b>  |              |
| <i>TpnC41C</i>    | FBgn0013348 | <b>0.398</b> |              |              |
| <i>CG3829</i>     | FBgn0035091 | <b>0.394</b> |              |              |
| <i>HDC20114</i>   |             | <b>0.370</b> |              |              |
| <i>Ser</i>        | FBgn0004197 | <b>0.366</b> | <b>0.385</b> |              |
| <i>Transpac</i>   | FBte0001377 | <b>0.363</b> |              |              |
| <i>CG41099</i>    | FBgn0039955 | <b>0.362</b> |              |              |
| <i>CG3788</i>     | FBgn0034800 | <b>0.353</b> |              |              |
| <i>CG17698</i>    | FBgn0040056 | <b>0.347</b> |              |              |
| <i>br</i>         | FBgn0000210 | <b>0.327</b> |              |              |
| <i>slgA</i>       | FBgn0003423 | <b>0.316</b> | <b>0.345</b> |              |
| <i>mos</i>        | FBgn0033773 | <b>0.309</b> |              |              |
| <i>Caps</i>       | FBgn0053653 | <b>0.284</b> |              |              |
| <i>CR43242</i>    | FBgn0262887 | <b>0.252</b> |              | <b>0.097</b> |
| <i>CG40160</i>    | FBgn0058160 | <b>0.239</b> | <b>0.441</b> |              |
| <i>CR43242</i>    | FBgn0262887 | <b>0.239</b> |              | <b>0.097</b> |
| <i>CG40006</i>    | FBgn0058006 | <b>0.230</b> | <b>28.55</b> |              |
| <i>CG40294</i>    | FBgn0058294 | <b>0.157</b> |              | <b>0.398</b> |
| <i>CG30440</i>    | FBgn0050440 | <b>0.132</b> |              |              |
| <i>Maf1</i>       | FBgn0267861 | <b>0.129</b> |              |              |
| <i>Caps</i>       | FBgn0053653 | <b>0.116</b> |              |              |
| <i>CR45923</i>    | FBgn0267585 | <b>0.093</b> | <b>6.95</b>  |              |
| <i>CG17698</i>    | FBgn0040056 | <b>0.093</b> |              |              |
| <i>CG32017</i>    | FBgn0052017 | <b>0.058</b> | <b>5.13</b>  |              |
| <i>Cht3</i>       | FBgn0250907 | <b>0.029</b> |              |              |
| <i>Su(var)205</i> | FBgn0003607 | <b>0.025</b> |              |              |

Transcripts that are up- or down-regulated by RNAi-mediated depletion of HP1 in Kc cells and H1 in L3 salivary glands or a homozygous null mutation of *Chd1* in L3 larvae. Fold change is calculated from Affymetrix microarray data relative to wild-type control. Transposons, repetitive and presumed heterochromatic sequences (Chr Xh, Chr 2h, Chr 3h and Chr4) are shown in red type.

**Table S4** Overlap of transcripts regulated by ISWI, H1 and CHD1.

| SYMBOL/<br>TRANSCRIPT                   | FLYBASE ID  | FOLD CHANGE  |              |              |
|-----------------------------------------|-------------|--------------|--------------|--------------|
|                                         |             | ISWI<br>KD   | H1 KD        | <i>Chd1</i>  |
| <b>ISWI depletion effect: <i>UP</i></b> |             |              |              |              |
| <i>CG42675</i>                          | FBgn0261561 | <b>48.78</b> | <b>0.376</b> |              |
| <i>Ance-5</i>                           | FBgn0035076 | <b>37.27</b> | <b>2.73</b>  |              |
| <i>CG33225</i>                          | FBgn0053225 | <b>27.57</b> | <b>31.76</b> |              |
| <i>Acer</i>                             | FBgn0016122 | <b>24.68</b> | <b>3.27</b>  |              |
| <i>CG14787</i>                          | FBgn0027793 | <b>17.33</b> |              | <b>2.91</b>  |
| <i>CG33465</i>                          | FBgn0053465 | <b>16.53</b> | <b>2.80</b>  |              |
| <i>CG42807</i>                          | FBgn0261989 | <b>16.34</b> |              |              |
| <i>CG9008</i>                           | FBgn0028540 | <b>15.47</b> |              |              |
| <i>Cyp6d5</i>                           | FBgn0038194 | <b>13.46</b> |              | <b>0.490</b> |
| <i>CG45057</i>                          | FBgn0266417 | <b>13.26</b> | <b>2.20</b>  |              |
| <i>GstD7</i>                            | FBgn0010043 | <b>12.65</b> | <b>3.98</b>  | <b>3.61</b>  |
| <i>CG8399</i>                           | FBgn0034067 | <b>12.34</b> | <b>5.09</b>  |              |
| <i>CG30091</i>                          | FBgn0050091 | <b>11.62</b> |              | <b>0.187</b> |
| <i>yellow-f2</i>                        | FBgn0038105 | <b>11.48</b> | <b>5.78</b>  |              |
| <i>nvy</i>                              | FBgn0005636 | <b>10.70</b> |              |              |
| <i>Obp44a</i>                           | FBgn0033268 | <b>10.65</b> | <b>32.99</b> |              |
| <i>zye</i>                              | FBgn0036985 | <b>10.55</b> |              |              |
| <i>ClC-a</i>                            | FBgn0051116 | <b>10.16</b> |              |              |
| <i>CG6357</i>                           | FBgn0033875 | <b>9.69</b>  | <b>10.96</b> |              |
| <i>pgant2</i>                           | FBgn0031530 | <b>9.31</b>  |              |              |
| <i>CG12910</i>                          | FBgn0033502 | <b>9.24</b>  |              |              |
| <i>CG15202</i>                          | FBgn0030271 | <b>9.00</b>  | <b>0.412</b> |              |
| <i>CG5397</i>                           | FBgn0031327 | <b>8.87</b>  | <b>3.33</b>  |              |
| <i>CG13077</i>                          | FBgn0032810 | <b>8.67</b>  |              |              |
| <i>Cht2</i>                             | FBgn0022702 | <b>8.62</b>  |              |              |
| <i>NimB3</i>                            | FBgn0054003 | <b>8.52</b>  |              |              |
| <i>CG31219</i>                          | FBgn0051219 | <b>8.14</b>  |              |              |
| <i>CG17321</i>                          | FBgn0032719 | <b>7.96</b>  |              |              |
| <i>CG5731</i>                           | FBgn0032192 | <b>7.79</b>  | <b>2.72</b>  |              |
| <i>CG33120</i>                          | FBgn0053120 | <b>7.62</b>  |              |              |
| <i>wdp</i>                              | FBgn0034718 | <b>7.45</b>  |              |              |
| <i>Ggamma30A</i>                        | FBgn0267252 | <b>7.22</b>  | <b>3.07</b>  |              |
| <i>CG32483</i>                          | FBgn0052483 | <b>7.18</b>  |              | <b>2.77</b>  |
| <i>Sodh-2</i>                           | FBgn0022359 | <b>7.12</b>  |              |              |
| <i>CG17681</i>                          | FBgn0032668 | <b>7.00</b>  |              |              |
| <i>CG10126</i>                          | FBgn0038088 | <b>6.97</b>  |              |              |
| <i>MESK4</i>                            | FBgn0043069 | <b>6.97</b>  | <b>0.342</b> | <b>0.473</b> |
| <i>Obp49a</i>                           | FBgn0050052 | <b>6.88</b>  |              |              |
| <i>CG10311</i>                          | FBgn0038420 | <b>6.87</b>  |              |              |
| <i>fng</i>                              | FBgn0011591 | <b>6.74</b>  |              |              |
| <i>Gli</i>                              | FBgn0001987 | <b>6.60</b>  |              |              |
| <i>CG16710</i>                          | FBgn0039101 | <b>6.33</b>  |              |              |
| <i>CG14990</i>                          | FBgn0035496 | <b>6.14</b>  |              |              |
| <i>Mtk</i>                              | FBgn0014865 | <b>6.09</b>  |              | <b>0.438</b> |
| <i>mthl14</i>                           | FBgn0052476 | <b>6.02</b>  | <b>15.70</b> |              |
| <i>CG11638</i>                          | FBgn0040351 | <b>5.97</b>  |              |              |

|                 |             |             |              |              |
|-----------------|-------------|-------------|--------------|--------------|
| <i>CG30345</i>  | FBgn0050345 | <b>5.74</b> |              |              |
| <i>CG5001</i>   | FBgn0031322 | <b>5.55</b> |              |              |
| <i>e</i>        | FBgn0000527 | <b>5.46</b> | <b>2.93</b>  | <b>0.042</b> |
| <i>CG42369</i>  | FBgn0259715 | <b>5.45</b> | <b>7.66</b>  |              |
| <i>Mdr49</i>    | FBgn0004512 | <b>5.34</b> | <b>3.38</b>  |              |
| <i>RpS30</i>    | FBgn0038834 | <b>5.33</b> |              |              |
| <i>CG1124</i>   | FBgn0037290 | <b>5.25</b> |              | <b>0.493</b> |
| <i>CG31274</i>  | FBgn0051274 | <b>5.24</b> | <b>0.326</b> | <b>0.418</b> |
| <i>Kal1</i>     | FBgn0039155 | <b>5.17</b> | <b>0.168</b> |              |
| <i>dmGlut</i>   | FBgn0010497 | <b>5.17</b> | <b>0.167</b> |              |
| <i>CG17029</i>  | FBgn0036551 | <b>5.17</b> |              |              |
| <i>Fuca</i>     | FBgn0036169 | <b>5.14</b> | <b>3.88</b>  |              |
| <i>Tsp42Ea</i>  | FBgn0029508 | <b>5.03</b> |              |              |
| <i>qsm</i>      | FBgn0028622 | <b>4.98</b> |              |              |
| <i>lea</i>      | FBgn0002543 | <b>4.97</b> | <b>3.29</b>  |              |
| <i>yellow-c</i> | FBgn0041713 | <b>4.92</b> |              | <b>0.146</b> |
| <i>cad</i>      | FBgn0000251 | <b>4.91</b> | <b>8.04</b>  |              |
| <i>CG6830</i>   | FBgn0037934 | <b>4.83</b> |              |              |
| <i>dpr17</i>    | FBgn0051361 | <b>4.81</b> |              |              |
| <i>CG13377</i>  | FBgn0261446 | <b>4.65</b> |              |              |
| <i>CG11378</i>  | FBgn0040364 | <b>4.62</b> | <b>0.331</b> |              |
| <i>CG9691</i>   | FBgn0030160 | <b>4.55</b> |              |              |
| <i>ChLD3</i>    | FBgn0032598 | <b>4.44</b> |              |              |
| <i>CG17751</i>  | FBgn0038717 | <b>4.43</b> |              |              |
| <i>CG13921</i>  | FBgn0035267 | <b>4.27</b> | <b>4.49</b>  |              |
| <i>twz</i>      | FBgn0034636 | <b>4.25</b> |              | <b>0.232</b> |
| <i>CG30148</i>  | FBgn0050148 | <b>4.22</b> |              |              |
| <i>CG7966</i>   | FBgn0038115 | <b>4.19</b> |              |              |
| <i>CG31743</i>  | FBgn0032618 | <b>4.18</b> |              | <b>2.60</b>  |
| <i>Snap25</i>   | FBgn0011288 | <b>4.17</b> | <b>33.90</b> |              |
| <i>CG9801</i>   | FBgn0037623 | <b>4.13</b> | <b>0.360</b> | <b>0.423</b> |
| <i>CG14516</i>  | FBgn0039640 | <b>4.05</b> |              |              |
| <i>Gs1</i>      | FBgn0001142 | <b>3.89</b> |              |              |
| <i>CG10359</i>  | FBgn0035452 | <b>3.89</b> |              |              |
| <i>Ude</i>      | FBgn0039226 | <b>3.85</b> |              | <b>5.03</b>  |
| <i>Drs</i>      | FBgn0010381 | <b>3.78</b> | <b>4.28</b>  | <b>0.451</b> |
| <i>CG7607</i>   | FBgn0036145 | <b>3.71</b> | <b>3.73</b>  |              |
| <i>CG15772</i>  | FBgn0029799 | <b>3.70</b> |              |              |
| <i>sPLA2</i>    | FBgn0033170 | <b>3.67</b> |              |              |
| <i>CG32313</i>  | FBgn0052313 | <b>3.63</b> |              |              |
| <i>twit</i>     | FBgn0032895 | <b>3.59</b> |              |              |
| <i>PCB</i>      | FBgn0027580 | <b>3.58</b> |              |              |
| <i>Gyc-89Db</i> | FBgn0038436 | <b>3.56</b> |              |              |
| <i>Cyp6d2</i>   | FBgn0034756 | <b>3.53</b> |              |              |
| <i>CG16789</i>  | FBgn0037712 | <b>3.47</b> |              |              |
| <i>Gk</i>       | FBgn0035266 | <b>3.39</b> |              |              |
| <i>Cby</i>      | FBgn0067317 | <b>3.38</b> |              |              |
| <i>CG7860</i>   | FBgn0030653 | <b>3.36</b> |              |              |
| <i>Mmp1</i>     | FBgn0035049 | <b>3.34</b> | <b>11.63</b> | <b>0.264</b> |
| <i>yellow-b</i> | FBgn0032601 | <b>3.34</b> |              |              |
| <i>Pka-C3</i>   | FBgn0000489 | <b>3.28</b> |              |              |
| <i>CG7781</i>   | FBgn0032021 | <b>3.26</b> |              |              |

|                    |             |             |              |              |
|--------------------|-------------|-------------|--------------|--------------|
| <i>Cyp6a17</i>     | FBgn0015714 | <b>3.22</b> | <b>3.26</b>  |              |
| <i>CG45263</i>     | FBgn0266801 | <b>3.22</b> |              |              |
| <i>GlcAT-S</i>     | FBgn0032135 | <b>3.20</b> | <b>0.331</b> |              |
| <i>CG10877</i>     | FBgn0038804 | <b>3.18</b> | <b>0.157</b> |              |
| <i>btn</i>         | FBgn0014949 | <b>3.16</b> |              |              |
| <i>PlexB</i>       | FBgn0025740 | <b>3.14</b> |              |              |
| <i>CG3505</i>      | FBgn0038250 | <b>3.10</b> |              |              |
| <i>CG30380</i>     | FBgn0050380 | <b>3.09</b> |              |              |
| <i>SkpB</i>        | FBgn0026176 | <b>3.08</b> |              |              |
| <i>GLaz</i>        | FBgn0033799 | <b>3.07</b> | <b>4.64</b>  |              |
| <i>Cyp6a23</i>     | FBgn0033978 | <b>3.07</b> | <b>16.25</b> | <b>5.98</b>  |
| <i>Dhc36C</i>      | FBgn0013810 | <b>3.07</b> |              |              |
| <i>CG15343</i>     | FBgn0030029 | <b>3.07</b> | <b>0.124</b> | <b>0.423</b> |
| <i>ft</i>          | FBgn0001075 | <b>3.06</b> |              |              |
| <i>MESK2</i>       | FBgn0043070 | <b>3.04</b> |              |              |
| <i>CG6218</i>      | FBgn0038321 | <b>3.01</b> |              |              |
| <i>Ama</i>         | FBgn0000071 | <b>3.01</b> | <b>2.27</b>  | <b>0.371</b> |
| <i>Oat</i>         | FBgn0022774 | <b>3.00</b> | <b>0.077</b> | <b>0.306</b> |
| <i>fax</i>         | FBgn0014163 | <b>2.98</b> |              |              |
| <i>CG34288</i>     | FBgn0085317 | <b>2.96</b> |              |              |
| <i>baz</i>         | FBgn0000163 | <b>2.96</b> | <b>0.369</b> |              |
| <i>CG4630</i>      | FBgn0033809 | <b>2.95</b> | <b>0.301</b> |              |
| <i>CG5783</i>      | FBgn0032670 | <b>2.95</b> | <b>0.388</b> |              |
| <i>LamC</i>        | FBgn0010397 | <b>2.95</b> |              | <b>2.08</b>  |
| <i>CG3625</i>      | FBgn0031245 | <b>2.92</b> |              |              |
| <i>Cyp6a22</i>     | FBgn0013773 | <b>2.92</b> | <b>7.50</b>  |              |
| <i>PPO1</i>        | FBgn0261362 | <b>2.92</b> | <b>6.89</b>  |              |
| <i>CG12262</i>     | FBgn0035811 | <b>2.91</b> |              |              |
| <i>miple2</i>      | FBgn0029002 | <b>2.87</b> |              |              |
| <i>LpR1</i>        | FBgn0066101 | <b>2.87</b> |              |              |
| <i>Jheh1</i>       | FBgn0010053 | <b>2.85</b> |              |              |
| <i>slgA</i>        | FBgn0003423 | <b>2.85</b> | <b>0.345</b> |              |
| <i>Pepck</i>       | FBgn0003067 | <b>2.84</b> |              | <b>2.30</b>  |
| <i>Cyp4d20</i>     | FBgn0035344 | <b>2.81</b> |              |              |
| <i>CG5577</i>      | FBgn0036759 | <b>2.81</b> | <b>0.359</b> |              |
| <i>CG34409</i>     | FBgn0085438 | <b>2.80</b> |              |              |
| <i>brv3</i>        | FBgn0040333 | <b>2.80</b> |              |              |
| <i>AdamTS-A</i>    | FBgn0038341 | <b>2.79</b> | <b>0.207</b> |              |
| <i>rgn</i>         | FBgn0261258 | <b>2.78</b> | <b>11.07</b> |              |
| <i>Dat</i>         | FBgn0019643 | <b>2.74</b> |              |              |
| <i>CG8547</i>      | FBgn0033919 | <b>2.72</b> |              |              |
| <i>Gbp</i>         | FBgn0034199 | <b>2.72</b> |              | <b>0.429</b> |
| <i>CG10232</i>     | FBgn0039108 | <b>2.68</b> | <b>4.13</b>  |              |
| <i>CG14036</i>     | FBgn0031677 | <b>2.68</b> |              |              |
| <i>HDC15448</i>    |             | <b>2.66</b> |              |              |
| <i>corolla</i>     | FBgn0267967 | <b>2.66</b> |              |              |
| <i>Ror</i>         | FBgn0010407 | <b>2.66</b> |              |              |
| <i>pdgy</i>        | FBgn0027601 | <b>2.66</b> |              |              |
| <i>fra</i>         | FBgn0011592 | <b>2.65</b> |              |              |
| <i>CG1969</i>      | FBgn0039690 | <b>2.65</b> | <b>0.218</b> |              |
| <i>S.C3R003414</i> |             | <b>2.64</b> |              |              |
| <i>wus</i>         | FBgn0030805 | <b>2.62</b> |              |              |

|                   |             |             |              |              |
|-------------------|-------------|-------------|--------------|--------------|
| <i>CG8353</i>     | FBgn0032002 | <b>2.62</b> |              |              |
| <i>CG10764</i>    | FBgn0034221 | <b>2.61</b> |              | <b>0.390</b> |
| <i>CG30503</i>    | FBgn0050503 | <b>2.60</b> |              | <b>3.14</b>  |
| <i>CG11983</i>    | FBgn0037654 | <b>2.60</b> |              |              |
| <i>CG11897</i>    | FBgn0039644 | <b>2.59</b> | <b>5.52</b>  | <b>2.14</b>  |
| <i>Mmp1</i>       | FBgn0035049 | <b>2.57</b> | <b>9.53</b>  | <b>0.264</b> |
| <i>Cyp310a1</i>   | FBgn0032693 | <b>2.57</b> | <b>6.31</b>  |              |
| <i>Cyp4d2</i>     | FBgn0011576 | <b>2.57</b> |              |              |
| <i>whd</i>        | FBgn0261862 | <b>2.56</b> |              |              |
| <i>CG8066</i>     | FBgn0038243 | <b>2.55</b> | <b>5.94</b>  |              |
| <i>betaTub60D</i> | FBgn0003888 | <b>2.55</b> | <b>3.13</b>  |              |
| <i>CG32436</i>    | FBgn0052436 | <b>2.53</b> |              |              |
| <i>Cyp6a20</i>    | FBgn0033980 | <b>2.52</b> |              |              |
| <i>Cyp12a4</i>    | FBgn0038681 | <b>2.52</b> | <b>3.42</b>  |              |
| <i>Src64B</i>     | FBgn0262733 | <b>2.50</b> |              |              |
| <i>c(2)M</i>      | FBgn0028525 | <b>2.50</b> | <b>2.93</b>  |              |
| <i>Npc2b</i>      | FBgn0038198 | <b>2.49</b> |              |              |
| <i>CG42390</i>    | FBgn0259736 | <b>2.48</b> | <b>0.464</b> | <b>2.51</b>  |
| <i>mbc</i>        | FBgn0015513 | <b>2.47</b> |              |              |
| <i>CG31751</i>    | FBgn0086909 | <b>2.47</b> | <b>0.375</b> |              |
| <i>Adk3</i>       | FBgn0042094 | <b>2.47</b> |              |              |
| <i>Spn27A</i>     | FBgn0028990 | <b>2.47</b> |              |              |
| <i>dpp</i>        | FBgn0000490 | <b>2.46</b> |              |              |
| <i>Mmp1</i>       | FBgn0035049 | <b>2.46</b> | <b>15.55</b> | <b>0.264</b> |
| <i>CG17549</i>    | FBgn0032774 | <b>2.44</b> |              |              |
| <i>CG34331</i>    | FBgn0085360 | <b>2.44</b> |              |              |
| <i>Hydr1</i>      | FBgn0033382 | <b>2.43</b> |              |              |
| <i>CG32280</i>    | FBgn0052280 | <b>2.43</b> |              |              |
| <i>Tequila</i>    | FBgn0023479 | <b>2.43</b> |              |              |
| <i>Atpalpha</i>   | FBgn0002921 | <b>2.42</b> |              |              |
| <i>nrv3</i>       | FBgn0032946 | <b>2.42</b> | <b>8.16</b>  |              |
| <i>Hsp27</i>      | FBgn0001226 | <b>2.41</b> |              | <b>0.457</b> |
| <i>corn</i>       | FBgn0259173 | <b>2.41</b> | <b>12.44</b> |              |
| <i>CG17350</i>    | FBgn0032772 | <b>2.40</b> |              |              |
| <i>CG15544</i>    | FBgn0039804 | <b>2.40</b> |              | <b>0.406</b> |
| <i>CG8501</i>     | FBgn0033724 | <b>2.40</b> |              |              |
| <i>CG12206</i>    | FBgn0029662 | <b>2.40</b> |              |              |
| <i>GlyP</i>       | FBgn0004507 | <b>2.39</b> |              |              |
| <i>Tsp42Ed</i>    | FBgn0029507 | <b>2.39</b> |              |              |
| <i>NtR</i>        | FBgn0029147 | <b>2.39</b> | <b>2.51</b>  |              |
| <i>CG7142</i>     | FBgn0038595 | <b>2.38</b> | <b>5.56</b>  |              |
| <i>CG15093</i>    | FBgn0034390 | <b>2.37</b> | <b>2.02</b>  |              |
| <i>CDase</i>      | FBgn0039774 | <b>2.36</b> | <b>2.07</b>  |              |
| <i>sano</i>       | FBgn0034408 | <b>2.35</b> | <b>4.83</b>  |              |
| <i>EF-G2</i>      | FBgn0051159 | <b>2.35</b> |              |              |
| <i>Dmtn</i>       | FBgn0037443 | <b>2.34</b> |              |              |
| <i>CG1969</i>     | FBgn0039690 | <b>2.34</b> | <b>0.189</b> |              |
| <i>CG13907</i>    | FBgn0035173 | <b>2.33</b> |              |              |
| <i>sdk</i>        | FBgn0021764 | <b>2.33</b> |              |              |
| <i>CG40115</i>    | FBgn0058115 | <b>2.33</b> | <b>10.26</b> |              |
| <i>CG10824</i>    | FBgn0038865 | <b>2.30</b> | <b>2.24</b>  |              |
| <i>CG14984</i>    | FBgn0035480 | <b>2.30</b> | <b>2.07</b>  |              |

|                    |             |             |              |              |
|--------------------|-------------|-------------|--------------|--------------|
| <i>Jabba</i>       | FBgn0259682 | <b>2.30</b> |              |              |
| <i>Cyp6a13</i>     | FBgn0033304 | <b>2.30</b> | <b>5.64</b>  |              |
| <i>CG17919</i>     | FBgn0037433 | <b>2.29</b> | <b>9.35</b>  |              |
| <i>Ance</i>        | FBgn0012037 | <b>2.28</b> |              |              |
| <i>CG18508</i>     | FBgn0028746 | <b>2.28</b> |              |              |
| <i>CG33111</i>     | FBgn0053111 | <b>2.28</b> |              |              |
| <i>Itgbetanu</i>   | FBgn0010395 | <b>2.27</b> |              |              |
| <i>CG43658</i>     | FBgn0263706 | <b>2.27</b> |              |              |
| <i>CG16947</i>     | FBgn0031816 | <b>2.27</b> | <b>0.285</b> |              |
| <i>Cyp12d1-d</i>   | FBgn0053503 | <b>2.26</b> |              |              |
| <i>CG33181</i>     | FBgn0053181 | <b>2.26</b> | <b>7.63</b>  |              |
| <i>CG13252</i>     | FBgn0037016 | <b>2.25</b> | <b>0.440</b> |              |
| <i>Asph</i>        | FBgn0034075 | <b>2.25</b> | <b>0.427</b> | <b>0.308</b> |
| <i>dnd</i>         | FBgn0038916 | <b>2.25</b> |              |              |
| <i>Mctp</i>        | FBgn0034389 | <b>2.25</b> | <b>0.300</b> | <b>2.95</b>  |
| <i>CG15914</i>     | FBgn0030700 | <b>2.24</b> |              |              |
| <i>dlp</i>         | FBgn0041604 | <b>2.24</b> |              |              |
| <i>bgcn</i>        | FBgn0004581 | <b>2.23</b> |              |              |
| <i>Apoltp</i>      | FBgn0032136 | <b>2.22</b> | <b>2.89</b>  | <b>5.70</b>  |
| <i>CG40115</i>     | FBgn0058115 | <b>2.22</b> | <b>7.20</b>  |              |
| <i>CG3831</i>      | FBgn0034804 | <b>2.22</b> |              | <b>0.480</b> |
| <i>CG5853</i>      | FBgn0032167 | <b>2.20</b> |              |              |
| <i>CG12746</i>     | FBgn0037341 | <b>2.20</b> |              |              |
| <i>springer</i>    | FBte0000333 | <b>2.19</b> |              |              |
| <i>SD02481</i>     | FBcl0277517 | <b>2.18</b> |              |              |
| <i>fat-spondin</i> | FBgn0026721 | <b>2.18</b> |              |              |
| <i>Fem-1</i>       | FBgn0034542 | <b>2.17</b> |              |              |
| <i>Oatp30B</i>     | FBgn0032123 | <b>2.17</b> |              |              |
| <i>mthl5</i>       | FBgn0037960 | <b>2.17</b> |              | <b>0.476</b> |
| <i>SAK</i>         | FBgn0026371 | <b>2.16</b> |              |              |
| <i>Vha68-1</i>     | FBgn0265262 | <b>2.15</b> | <b>2.42</b>  |              |
| <i>norpA</i>       | FBgn0262738 | <b>2.15</b> |              |              |
| <i>Ect3</i>        | FBgn0260746 | <b>2.15</b> | <b>2.21</b>  |              |
| <i>CG3038</i>      | FBgn0040373 | <b>2.14</b> |              |              |
| <i>CG32032</i>     | FBgn0043806 | <b>2.14</b> |              |              |
| <i>CG9547</i>      | FBgn0031824 | <b>2.13</b> |              |              |
| <i>CG12643</i>     | FBgn0040942 | <b>2.12</b> |              |              |
| <i>CG31974</i>     | FBgn0051974 | <b>2.12</b> | <b>4.74</b>  | <b>2.23</b>  |
| <i>CAH1</i>        | FBgn0027844 | <b>2.11</b> | <b>2.25</b>  | <b>0.493</b> |
| <i>mtg</i>         | FBgn0260386 | <b>2.11</b> | <b>2.25</b>  | <b>2.83</b>  |
| <i>CG30441</i>     | FBgn0050441 | <b>2.11</b> |              |              |
| <i>TM4SF</i>       | FBgn0020372 | <b>2.11</b> |              |              |
| <i>Cpr49Ag</i>     | FBgn0033730 | <b>2.10</b> |              |              |
| <i>ImpE3</i>       | FBgn0001255 | <b>2.10</b> |              | <b>0.171</b> |
| <i>CG10516</i>     | FBgn0036549 | <b>2.10</b> |              | <b>0.293</b> |
| <i>zuc</i>         | FBgn0261266 | <b>2.09</b> |              |              |
| <i>Tret1-1</i>     | FBgn0050035 | <b>2.07</b> |              |              |
| <i>Muc68Ca</i>     | FBgn0036181 | <b>2.07</b> |              | <b>7.36</b>  |
| <i>CG17754</i>     | FBgn0030114 | <b>2.07</b> |              | <b>0.490</b> |
| <i>CG45186</i>     | FBgn0266696 | <b>2.06</b> | <b>0.433</b> |              |
| <i>Atet</i>        | FBgn0020762 | <b>2.06</b> |              | <b>0.470</b> |
| <i>CG5080</i>      | FBgn0031313 | <b>2.06</b> |              |              |

|                                    |             |       |       |       |
|------------------------------------|-------------|-------|-------|-------|
| <i>cyc</i>                         | FBgn0023094 | 2.05  |       |       |
| <i>CG33947</i>                     | FBgn0083068 | 2.05  |       |       |
| <i>SLC5A11</i>                     | FBgn0031998 | 2.05  |       |       |
| <i>CG14523</i>                     | FBgn0039612 | 2.04  |       |       |
| <i>CG42684</i>                     | FBgn0261570 | 2.04  |       |       |
| <i>CG17265</i>                     | FBgn0031488 | 2.03  |       |       |
| <i>CG42327</i>                     | FBgn0259227 | 2.03  |       |       |
| <i>CG5096</i>                      | FBgn0032235 | 2.03  | 3.96  |       |
| <i>CG9914</i>                      | FBgn0030737 | 2.03  | 4.84  |       |
| <i>Dip3</i>                        | FBgn0040465 | 2.03  |       |       |
| <i>mthl10</i>                      | FBgn0035132 | 2.03  |       |       |
| <i>Dark</i>                        | FBgn0263864 | 2.02  | 0.249 | 0.418 |
| <i>Apf</i>                         | FBgn0051713 | 2.02  |       |       |
| <i>CG6330</i>                      | FBgn0039464 | 2.01  |       |       |
| <i>ItgalphaPS4</i>                 | FBgn0034005 | 2.01  | 3.91  |       |
| <i>FER</i>                         | FBgn0000723 | 2.01  |       |       |
| <i>CG41128</i>                     | FBgn0069923 | 2.00  | 0.338 |       |
| <b>ISWI depletion effect: DOWN</b> |             |       |       |       |
| <i>CG40191</i>                     | FBgn0058191 | 0.498 |       |       |
| <i>laccase2</i>                    | FBgn0259247 | 0.498 |       |       |
| <i>CG7322</i>                      | FBgn0030968 | 0.495 |       |       |
| <i>ppk29</i>                       | FBgn0034965 | 0.495 |       |       |
| <i>CG31619</i>                     | FBgn0051619 | 0.495 | 2.82  |       |
| <i>CG12391</i>                     | FBgn0033581 | 0.494 |       |       |
| <i>Nap1</i>                        | FBgn0015268 | 0.494 |       |       |
| <i>Gpo-1</i>                       | FBgn0022160 | 0.493 | 3.37  | 3.32  |
| <i>Doc3</i>                        | FBgn0035954 | 0.490 |       |       |
| <i>HDC14725</i>                    |             | 0.488 |       |       |
| <i>CG10433</i>                     | FBgn0034638 | 0.487 | 3.25  | 3.05  |
| <i>CG8765</i>                      | FBgn0036900 | 0.487 |       |       |
| <i>HDC16707</i>                    |             | 0.485 |       |       |
| <i>cactin</i>                      | FBgn0031114 | 0.484 | 2.77  |       |
| <i>Marcal1</i>                     | FBgn0031655 | 0.484 |       |       |
| <i>lute</i>                        | FBgn0262871 | 0.484 | 0.286 |       |
| <i>CG32625</i>                     | FBgn0052625 | 0.482 | 39.17 |       |
| <i>ham</i>                         | FBgn0045852 | 0.480 |       |       |
| <i>CG7900</i>                      | FBgn0037548 | 0.476 | 2.96  | 2.71  |
| <i>CG7120</i>                      | FBgn0035888 | 0.475 |       |       |
| <i>Gs2</i>                         | FBgn0001145 | 0.474 | 3.09  |       |
| <i>Cdep</i>                        | FBgn0265082 | 0.472 | 0.481 |       |
| <i>mgl</i>                         | FBgn0261260 | 0.471 |       |       |
| <i>Arpc3B</i>                      | FBgn0065032 | 0.470 | 30.56 |       |
| <i>Sp7</i>                         | FBgn0037515 | 0.466 |       | 0.401 |
| <i>CG31997</i>                     | FBgn0051997 | 0.465 | 3.22  |       |
| <i>Aats-val</i>                    | FBgn0027079 | 0.465 |       |       |
| <i>Eip55E</i>                      | FBgn0000566 | 0.463 |       |       |
| <i>Aats-asn</i>                    | FBgn0086443 | 0.456 |       |       |
| <i>CG40131</i>                     | FBgn0058131 | 0.454 |       |       |
| <i>CG34228</i>                     | FBgn0085257 | 0.454 |       |       |
| <i>CG18747</i>                     | FBgn0042104 | 0.453 |       |       |
| <i>blanks</i>                      | FBgn0035608 | 0.453 | 98.58 | 0.321 |
| <i>CG44251</i>                     | FBgn0265186 | 0.450 | 2.21  |       |



|                   |             |              |               |             |
|-------------------|-------------|--------------|---------------|-------------|
| <i>PGRP-SA</i>    | FBgn0030310 | <b>0.449</b> | <b>2.20</b>   |             |
| <i>squ</i>        | FBgn0267347 | <b>0.448</b> |               |             |
| <i>CG12288</i>    | FBgn0032620 | <b>0.447</b> | <b>5.29</b>   |             |
| <i>CG42724</i>    | FBgn0261641 | <b>0.443</b> |               |             |
| <i>Taf2</i>       | FBgn0011836 | <b>0.443</b> |               |             |
| <i>Nop60B</i>     | FBgn0259937 | <b>0.443</b> | <b>3.70</b>   |             |
| <i>gce</i>        | FBgn0261703 | <b>0.443</b> |               |             |
| <i>CG1503</i>     | FBgn0031157 | <b>0.443</b> |               |             |
| <i>CG10089</i>    | FBgn0036369 | <b>0.436</b> | <b>13.85</b>  |             |
| <i>Ssk</i>        | FBgn0036945 | <b>0.431</b> |               |             |
| <i>Ac3</i>        | FBgn0023416 | <b>0.430</b> |               |             |
| <i>r-l</i>        | FBgn0003257 | <b>0.430</b> |               |             |
| <i>CG32088</i>    | FBgn0052088 | <b>0.430</b> |               |             |
| <i>CG14798</i>    | FBgn0029588 | <b>0.428</b> | <b>3.41</b>   |             |
| <i>sgll</i>       | FBgn0051472 | <b>0.424</b> |               |             |
| <i>CG32795</i>    | FBgn0040384 | <b>0.422</b> | <b>0.468</b>  |             |
| <i>png</i>        | FBgn0000826 | <b>0.420</b> |               |             |
| <i>CG1550</i>     | FBgn0033225 | <b>0.419</b> |               |             |
| <i>CG30339</i>    | FBgn0050339 | <b>0.417</b> |               |             |
| <i>CG18643</i>    | FBgn0037898 | <b>0.415</b> |               |             |
| <i>CG7458</i>     | FBgn0037144 | <b>0.413</b> |               | <b>2.06</b> |
| <i>CG2709</i>     | FBgn0024977 | <b>0.411</b> |               |             |
| <i>Aats-trp</i>   | FBgn0010803 | <b>0.411</b> | <b>0.171</b>  |             |
| <i>CG9902</i>     | FBgn0030757 | <b>0.411</b> |               |             |
| <i>CG6912</i>     | FBgn0038290 | <b>0.408</b> |               |             |
| <i>Gip</i>        | FBgn0011770 | <b>0.407</b> |               |             |
| <i>CG30340</i>    | FBgn0050340 | <b>0.406</b> |               |             |
| <i>sage</i>       | FBgn0037672 | <b>0.404</b> | <b>0.183</b>  |             |
| <i>HDC17231</i>   |             | <b>0.399</b> |               |             |
| <i>CG32017</i>    | FBgn0052017 | <b>0.396</b> | <b>5.13</b>   |             |
| <i>Cyt-b5-r</i>   | FBgn0000406 | <b>0.393</b> | <b>10.17</b>  | <b>2.57</b> |
| <i>Mal-B2</i>     | FBgn0032382 | <b>0.391</b> |               |             |
| <i>CG8613</i>     | FBgn0033924 | <b>0.390</b> |               |             |
| <i>f-cup</i>      | FBgn0028487 | <b>0.385</b> |               |             |
| <i>CG31769</i>    | FBgn0051769 | <b>0.380</b> | <b>2.49</b>   | <b>2.33</b> |
| <i>trk</i>        | FBgn0003751 | <b>0.380</b> | <b>4.61</b>   |             |
| <i>CG32196</i>    | FBgn0052196 | <b>0.378</b> |               |             |
| <i>CG1674</i>     | FBgn0039897 | <b>0.378</b> |               |             |
| <i>GstO1</i>      | FBgn0035907 | <b>0.377</b> | <b>6.65</b>   |             |
| <i>CG4793</i>     | FBgn0028514 | <b>0.374</b> | <b>15.37</b>  |             |
| <i>alpha-Est8</i> | FBgn0015576 | <b>0.374</b> |               | <b>2.83</b> |
| <i>Bx</i>         | FBgn0265598 | <b>0.373</b> | <b>2.05</b>   |             |
| <i>CG14545</i>    | FBgn0040602 | <b>0.372</b> | <b>157.17</b> |             |
| <i>CG14615</i>    | FBgn0031184 | <b>0.370</b> | <b>2.16</b>   |             |
| <i>CG4587</i>     | FBgn0028863 | <b>0.370</b> |               |             |
| <i>CG15100</i>    | FBgn0034401 | <b>0.362</b> |               |             |
| <i>nonA-l</i>     | FBgn0015520 | <b>0.353</b> |               |             |
| <i>CG30010</i>    | FBgn0050010 | <b>0.352</b> |               |             |
| <i>CG18586</i>    | FBgn0035642 | <b>0.347</b> |               |             |
| <i>CG1677</i>     | FBgn0029941 | <b>0.346</b> |               |             |
| <i>CT32987</i>    |             | <b>0.346</b> |               |             |
| <i>CG9305</i>     | FBgn0032512 | <b>0.342</b> |               |             |

|                    |             |              |              |              |
|--------------------|-------------|--------------|--------------|--------------|
| <i>CG10063</i>     | FBgn0035727 | <b>0.335</b> |              |              |
| <i>CG5568</i>      | FBgn0035641 | <b>0.334</b> |              |              |
| <i> fend</i>       | FBgn0030090 | <b>0.324</b> | <b>3.52</b>  |              |
| <i>CG15820</i>     | FBgn0035312 | <b>0.322</b> |              |              |
| <i>Vago</i>        | FBgn0030262 | <b>0.322</b> | <b>2.46</b>  |              |
| <i>Sox102F</i>     | FBgn0039938 | <b>0.321</b> |              |              |
| <i>CG9837</i>      | FBgn0037635 | <b>0.320</b> |              | <b>0.441</b> |
| <i>aub</i>         | FBgn0000146 | <b>0.319</b> |              |              |
| <i>ham</i>         | FBgn0045852 | <b>0.301</b> |              |              |
| <i>CG16888</i>     | FBgn0032533 | <b>0.301</b> |              |              |
| <i>blot</i>        | FBgn0027660 | <b>0.298</b> | <b>0.273</b> |              |
| <i>TfIIAlpha</i>   | FBgn0010282 | <b>0.292</b> |              |              |
| <i>CG31619</i>     | FBgn0051619 | <b>0.291</b> |              |              |
| <i>CG5285</i>      | FBgn0038490 | <b>0.291</b> | <b>2.33</b>  |              |
| <i>betaTub97EF</i> | FBgn0003890 | <b>0.284</b> |              |              |
| <i>CG17928</i>     | FBgn0032603 | <b>0.280</b> | <b>2.79</b>  |              |
| <i>stg1</i>        | FBgn0064123 | <b>0.270</b> |              |              |
| <i>CG34330</i>     | FBgn0085359 | <b>0.260</b> | <b>4.33</b>  |              |
| <i>CG32582</i>     | FBgn0052582 | <b>0.252</b> |              |              |
| <i>AGO3</i>        | FBgn0250816 | <b>0.250</b> | <b>11.47</b> |              |
| <i>GstE13</i>      | FBgn0033381 | <b>0.246</b> |              |              |
| <i>CG8336</i>      | FBgn0036020 | <b>0.244</b> |              |              |
| <i>CG43103</i>     | FBgn0262563 | <b>0.239</b> | <b>2.59</b>  |              |
| <i>veil</i>        | FBgn0034225 | <b>0.232</b> |              |              |
| <i>CG5144</i>      | FBgn0035957 | <b>0.223</b> |              |              |
| <i>CG3457</i>      | FBgn0024984 | <b>0.220</b> |              |              |
| <i>piwi</i>        | FBgn0004872 | <b>0.209</b> |              |              |
| <i>CG10581</i>     | FBgn0037046 | <b>0.206</b> | <b>5.98</b>  |              |
| <i>CG4872</i>      | FBgn0030799 | <b>0.183</b> | <b>10.25</b> |              |
| <i>Nxf3</i>        | FBgn0263232 | <b>0.183</b> |              |              |
| <i>Ugt36Bc</i>     | FBgn0040260 | <b>0.181</b> |              |              |
| <i>CG4210</i>      | FBgn0038302 | <b>0.169</b> | <b>2.30</b>  |              |
| <i>Nrg</i>         | FBgn0264975 | <b>0.144</b> |              |              |
| <i>CG13602</i>     | FBgn0264740 | <b>0.130</b> |              |              |
| <i>lswi</i>        | FBgn0011604 | <b>0.126</b> |              |              |
| <i>Nrg</i>         | FBgn0264975 | <b>0.113</b> |              |              |
| <i>eIF4E-6</i>     | FBgn0039622 | <b>0.112</b> |              |              |
| <i>fu12</i>        | FBgn0026718 | <b>0.101</b> | <b>3.56</b>  |              |
| <i>CG5367</i>      | FBgn0032228 | <b>0.053</b> |              |              |

Transcripts that are up- or down-regulated by RNAi-mediated depletion of ISWI in SL2 cells and H1 in L3 salivary glands or a homozygous null mutation of *Chd1* in L3 larvae. Fold change is calculated from Affymetrix microarray data relative to wild-type control.

## SUPPORTING REFERENCES

- Aoki, T., Sarkeshik, A., Yates, J., and P. Schedl, 2012 Elba, a novel developmentally regulated chromatin boundary factor is a hetero-tripartite DNA binding complex. *eLife* **1**: e00171.
- Arancio, W., Onorati, M.C., Burgio, G., Collesano, M., A.M. Ingrassia *et al.*, 2010 The nucleosome remodeling factor ISWI functionally interacts with an evolutionarily conserved network of cellular factors. *Genetics* **185**: 129-140.
- Ayyar, S., Jiang, J., Collu, A., White-Cooper, H., and R.A. White, 2003 *Drosophila* TGIF is essential for developmentally regulated transcription in spermatogenesis. *Development* **130**: 2841-2852.
- Baffet, A.D., Benoit, B., Januschke, J., Audo, J., V. Gourhand *et al.*, 2012 *Drosophila* tubulin-binding cofactor B is required for microtubule network formation and for cell polarity. *Mol Biol Cell* **23**: 3591-3601.
- Bateman, J., Shu, H., and D. Van Vactor, 2000. The guanine nucleotide exchange factor trio mediates axonal development in the *Drosophila* embryo. *Neuron* **26**: 93-106.
- Berkey, C.D., Blow, N., and P.I. Watnick 2009 Genetic analysis of *Drosophila melanogaster* susceptibility to intestinal *Vibrio cholerae* infection. *Cell Microbiol* **11**: 461-474.
- Bhat, K.M., and P. Schedl, 1997 Requirement for *engrailed* and *invected* genes reveals novel regulatory interactions between *engrailed/invected*, *patched*, *gooseberry* and *wingless* during *Drosophila* neurogenesis. *Development* **124**: 1675-1688.
- Blanke, S., and H. Jackle, 2006 Novel guanine nucleotide exchange factor GEFmeso of *Drosophila melanogaster* interacts with Ral and Rho GTPase Cdc42. *FASEB J* **20**: 683-691.
- Bobak, D.A., Nightingale, M.S., Murtagh, J.J., Price, S.R., J. Moss *et al.*, 1989 Molecular cloning, characterization, and expression of human ADP-ribosylation factors: two guanine nucleotide-dependent activators of cholera toxin. *Proc Natl Acad Sci U S A* **86**: 6101-6105.
- Chabu, C., and C.Q. Doe, 2008 Dap160/intersectin binds and activates aPKC to regulate cell polarity and cell cycle progression. *Development* **135**: 2739-2746.
- Chang, H.C., Solomon, N.M., Wassarman, D.A., Karim, F.D., M. Therrien *et al.*, 1995 *phyllopod* functions in the fate determination of a subset of photoreceptors in *Drosophila*. *Cell* **80**: 463-472.
- Clouse, K.N., Ferguson, S.B., and T. Schupbach, 2008 Squid, Cup, and PABP55B function together to regulate gurken translation in *Drosophila*. *Dev Biol* **313**: 713-724.
- Ding, Z.Y., Wang, Y.H., Luo, Z.K., Lee, H.F., J. Hwang *et al.*, 2011 Glial cell adhesive molecule unzipped mediates axon guidance in *Drosophila*. *Dev Dyn* **240**: 122-134.
- Dubnau, J., Chiang, A.S., Grady, L., Barditch, J., S. Gossweiler *et al.*, 2003 The *staufen/pumilio* pathway is involved in *Drosophila* long-term memory. *Curr Biol* **13**: 286-296.
- Dyer, N., Rebollo, E., Dominguez, P., Elkhatib, N., P. Chavrier P, *et al.*, 2007 Spermatocyte cytokinesis requires rapid membrane addition mediated by ARF6 on central spindle recycling endosomes. *Development* **134**: 4437-4447.
- Feng, Z., Liu, H., Lang, J., Li, Y., M. Shu *et al.*, 2009 SK66-his, a novel glycine-rich peptide derived from *Drosophila* with antibacterial activity. *Biosci Biotech Biochem* **73**: 769-771.
- Giniger, E., Tietje, K., Jan, L.Y., and Y.N. Jan, 1994 *lola* encodes a putative transcription factor required for axon growth and guidance in *Drosophila*. *Development* **120**: 1385-1398.
- Goldstein, L.S., and S. Gunawardena, 2000 Flying through the *Drosophila* cytoskeletal genome. *J Cell Biol* **150**: F63-68.
- Grimaud, C., Bantignies, F., Pal-Bhadra, M., Ghana, P., U. Bhadra *et al.*, 2006 RNAi components are required for nuclear clustering of Polycomb group response elements. *Cell* **124**: 957-971.
- Guntermann, S., Primrose, D.A., and E. Foley, 2009 Dnr1-dependent regulation of the *Drosophila* immune deficiency signaling pathway. *Dev Comp Immunol* **33**: 127-134.
- Hasegawa, E., Kaido, M., Takayama, R., and M. Sato, 2013 Brain-specific-homeobox is required for the specification of neuronal types in the *Drosophila* optic lobe. *Dev Biol* **377**: 90-99.
- Heidmann, D., Horn, S., Heidmann, S., Schleiffer, A., K. Nasmyth *et al.*, 2004 The *Drosophila* meiotic kleisin C(2)M functions before the meiotic divisions. *Chromosoma* **113**: 177-187.
- Hughes, J.R., Meireles, A.M., Fisher, K.H., Garcia, A., P.R. Antrobus *et al.*, 2008 A microtubule interactome: complexes with roles in cell cycle and mitosis. *PLoS Biol* **6**: e98.
- Hyman, C.A., Bartholin, L., Newfeld, S.J., and D. Wotton, 2003 *Drosophila* TGIF proteins are transcriptional activators. *Mol Cell Biol* **23**: 9262-9274.
- Issigonis, M., Tulina, N., de Cuevas, M., Brawley, C., L. Sandler *et al.*, 2009 JAK-STAT signal inhibition regulates competition in the *Drosophila* testis stem cell niche. *Science* **326**: 153-156.
- Jafari, S., Alkhor, L., Schleiffer, A., Brochtrup, A., T. Hummel *et al.*, 2012 Combinatorial activation and repression by seven transcription factors specify *Drosophila* odorant receptor expression. *PLoS Biol* **10**: e1001280.
- James, R.E., and H.T. Broihier, 2011 Crimpy inhibits the BMP homolog Gbb in motoneurons to enable proper growth control at the *Drosophila* neuromuscular junction. *Development* **138**: 3273-3286.
- Jin, L.H., Shim, J., Yoon, J.S., Kim, B., J. Kim *et al.*, 2008 Identification and functional analysis of antifungal immune response genes in *Drosophila*. *PLoS Pathogens* **4**: e1000168.

- Johnstone, O., and P. Lasko, 2001 Translational regulation and RNA localization in *Drosophila* oocytes and embryos. *Ann Rev Genet* **35**: 365-406.
- Kirilly, D., Spana, E.P., Perrimon, N., Padgett, R.W., and T. Xie, 2005 BMP signaling is required for controlling somatic stem cell self-renewal in the *Drosophila* ovary. *Dev Cell* **9**: 651-662.
- Kleino, A., Valanne, S., Ulvila, J., Kallio, J., H. Myllymaki *et al.*, 2005 Inhibitor of apoptosis 2 and TAK1-binding protein are components of the *Drosophila* Imd pathway. *EMBO J* **24**: 3423-3434.
- Koh, T.W., Verstreken, P., and H.J. Bellen, 2004 Dap160/intersectin acts as a stabilizing scaffold required for synaptic development and vesicle endocytosis. *Neuron* **43**: 193-205.
- Konev, A.Y., Tribus, M., Park, S.Y., Podhraski, V., C.Y. Lim *et al.*, 2007 CHD1 motor protein is required for deposition of histone variant H3.3 into chromatin in vivo. *Science* **317**: 1087-1090.
- Kraut, R., and K. Zinn, 2004 Roundabout 2 regulates migration of sensory neurons by signaling in trans. *Curr Biol* **14**: 1319-1329.
- Krueger, N.X., Reddy, R.S., Johnson, K., Bateman, J., N. Kaufmann *et al.*, 2003 Functions of the ectodomain and cytoplasmic tyrosine phosphatase domains of receptor protein tyrosine phosphatase Dlar in vivo. *Mol Cell Biol* **23**: 6909-6921.
- Krueger, N.X., Van Vactor, D., Wan, H.I., Gelbart, W.M., G.S. Goodman *et al.*, 1996 The transmembrane tyrosine phosphatase DLAR controls motor axon guidance in *Drosophila*. *Cell* **84**: 611-622.
- Kusch, T., Florens, L., Macdonald, W.H., Swanson, S.K., R.L. Glaser *et al.*, 2004 Acetylation by Tip60 is required for selective histone variant exchange at DNA lesions. *Science* **306**: 2084-2087.
- Laflamme, C., Assaker, G., Ramel, D., Dorn, J.F., D. She *et al.*, 2012 Evi5 promotes collective cell migration through its Rab-GAP activity. *J Cell Biol* **198**: 57-67.
- Lee, S.Y., Lee, S.Y., and Y. Choi, 1997 TRAF-interacting protein (TRIP): a novel component of the tumor necrosis factor receptor (TNFR)- and CD30-TRAF signaling complexes that inhibits TRAF2-mediated NF-kappaB activation. *J Exp Med* **185**: 1275-1285.
- Lloyd, T.E., Verstreken, P., Ostrin, E.J., Phillippi, A., O. Lichtarge *et al.*, 2000 A genome-wide search for synaptic vesicle cycle proteins in *Drosophila*. *Neuron* **26**: 45-50.
- Manser, E., Loo, T.H., Koh, C.G., Zhao, Z.S., X.Q. Chen *et al.*, 1998 PAK kinases are directly coupled to the PIX family of nucleotide exchange factors. *Mol Cell* **1**: 183-192.
- McDaniel, I.E., Lee, J.M., Berger, M.S., Hanagami, C.K., and J.A. Armstrong, 2008 Investigations of CHD1 function in transcription and development of *Drosophila melanogaster*. *Genetics* **178**: 583-587.
- Merkle, J.A., Rickmyre, J.L., Garg, A., Loggins, E.B., J.N. Jodoin *et al.*, 2009 *no poles* encodes a predicted E3 ubiquitin ligase required for early embryonic development of *Drosophila*. *Development* **136**: 449-459.
- Morante, J., Vallejo, D.M., Desplan, C., and M. Dominguez, 2013 Conserved miR-8/miR-200 defines a glial niche that controls neuroepithelial expansion and neuroblast transition. *Dev Cell* **27**: 174-187.
- Nagaraj, R., and U. Banerjee, 2009 Regulation of Notch and Wingless signalling by *phyllopod*, a transcriptional target of the EGFR pathway. *EMBO J* **28**: 337-346.
- Neumuller, R.A., Richter, C., Fischer, A., Novatchkova, M., K.G. Neumuller *et al.*, 2011 Genome-wide analysis of self-renewal in *Drosophila* neural stem cells by transgenic RNAi. *Cell Stem Cell* **8**: 580-593.
- O'Neill, R.S., and D.V. Clark, 2013 The *Drosophila melanogaster* septin gene *Sep2* has a redundant function with the retrogene *Sep5* in imaginal cell proliferation but is essential for oogenesis. *Genome* **56**: 753-758.
- Parnas, D., Haghghi, A.P., Fetter, R.D., Kim, S.W., and C.S. Goodman, 2001 Regulation of postsynaptic structure and protein localization by the Rho-type guanine nucleotide exchange factor dPix. *Neuron* **32**: 415-424.
- Parrish, J.Z., Kim, M.D., Jan, L.Y., and Y.N. Jan, 2006 Genome-wide analyses identify transcription factors required for proper morphogenesis of *Drosophila* sensory neuron dendrites. *Genes Dev* **20**: 820-835.
- Pertceva, J.A., Dorogova, N.V., Bolobolova, E.U., Nerusheva, O.O., S.A. Fedorova *et al.*, 2010 The role of *Drosophila* hyperplastic discs gene in spermatogenesis. *Cell Biol Int* **34**: 991-996.
- Rahn, T., Leippe, M., Roeder, T., and H. Fedders, 2013 EGFR signaling in the brain is necessary for olfactory learning in *Drosophila* larvae. *Learn Mem* **20**: 194-200.
- Simmonds, A.J., Brook, W.J., Cohen, S.M., and J.B. Bell, 1995 Distinguishable functions for *engrailed* and *invected* in anterior-posterior patterning in the *Drosophila* wing. *Nature* **376**: 424-427.
- Simpson, J.H., Kidd, T., Bland, K.S., and C.S. Goodman, 2000 Short-range and long-range guidance by slit and its Robo receptors. Robo and Robo2 play distinct roles in midline guidance. *Neuron* **28**: 753-766.
- Sinclair, D.A., Clegg, N.J., Antonchuk, J., Milne, T.A., K. Stankunas *et al.*, 1998 *Enhancer of Polycomb* is a suppressor of position-effect variegation in *Drosophila melanogaster*. *Genetics* **148**: 211-220.
- Singh, S.R., Zheng, Z., Wang, H., Oh, S.W., X. Chen *et al.*, 2010 Competitiveness for the niche and mutual dependence of the germline and somatic stem cells in the *Drosophila* testis are regulated by the JAK/STAT signaling. *J Cell Physiol* **223**: 500-510.
- Stankunas, K., Berger, J., Ruse, C., Sinclair, D.A., F. Randazzo *et al.*, 1998 The *Enhancer of Polycomb* gene of *Drosophila* encodes a chromatin protein conserved in yeast and mammals. *Development* **125**: 4055-4066.

- Tea, J.S., and L. Luo, 2011 The chromatin remodeling factor Bap55 functions through the TIP60 complex to regulate olfactory projection neuron dendrite targeting. *Neur Dev* **6**: 5.
- Terman, J.R., and A.L. Kolodkin, 2004 Nervy links protein kinase a to plexin-mediated semaphorin repulsion. *Science* **303**: 1204-1207.
- Tsuzuki, S., Ochiai, M., Matsumoto, H., Kurata, S., A. Ohnishi *et al.*, 2012 *Drosophila* growth-blocking peptide-like factor mediates acute immune reactions during infectious and non-infectious stress. *Sci Rep* **2**: 210.
- Wallace, H.A., Merkle, J.A., Yu, M.C., Berg, T.G., E. Lee *et al.*, 2014 TRIP/NOPO E3 ubiquitin ligase promotes ubiquitylation of DNA polymerase eta. *Development* **141**: 1332-1341.
- Wang, X., Shaw, W.R., Tsang, H.T., Reid, E., and C.J. O'Kane, 2007 *Drosophila* spichthyn inhibits BMP signaling and regulates synaptic growth and axonal microtubules. *Nat Neurosci* **10**: 177-185.
- Williams, R.W., and G.M. Rubin, 2002 ARGONAUTE1 is required for efficient RNA interference in *Drosophila* embryos. *Proc Natl Acad Sci U S A* **99**: 6889-6894.
- Xu, N., Emelyanov, A.V., Fyodorov, D.V., and A.I. Skultchi, 2014 *Drosophila* linker histone H1 coordinates STAT-dependent organization of heterochromatin and suppresses tumorigenesis caused by hyperactive JAK-STAT signaling. *Epigenetics Chromatin* **7**: 16.
- Yamaguchi, S., Katagiri, S., Sekimizu, K., Natori, S., and K.J. Homma, 2005 Involvement of EDTP, an egg-derived tyrosine phosphatase, in the early development of *Drosophila melanogaster*. *J Biochem* **138**: 721-728.
- Yamamoto, A., Zwarts, L., Callaerts, P., Norga, K., T.F. Mackay *et al.*, 2008 Neurogenetic networks for startle-induced locomotion in *Drosophila melanogaster*. *Proc Natl Acad Sci U S A* **105**: 12393-12398.
- Yang, H., Liu, C., Jamsen, J., Wu, Z., Y. Wang *et al.*, 2012 The DNase domain-containing protein TATDN1 plays an important role in chromosomal segregation and cell cycle progression during zebrafish eye development. *Cell Cycle* **11**: 4626-4632.
- Yang, L., Chen, D., Duan, R., Xia, L., J. Wang *et al.*, 2007 Argonaute 1 regulates the fate of germline stem cells in *Drosophila*. *Development* **134**: 4265-4272.
- Zheng, L., and R.W. Carthew, 2008 Lola regulates cell fate by antagonizing Notch induction in the *Drosophila* eye. *Mech Dev* **125**: 18-29.
