# Supplementary material for: A Genetic Screen and Transcript Profiling Reveal a Shared Regulatory Program for Drosophila Linker Histone H1 and Chromatin Remodeler CHD1
Source: PubMed Central journal article supplement (PMC4390582; doi:10.1534/g3.115.016709), 2015-01-27
Supplement: supp_g3.115.016709_TableS1.pdf [file supp_g3.115.016709_TableS1.pdf]

**Table S1 GO term analyses of genetic modifiers of *His1* effect on viability.**

| Gene Symbol                                                                        | Biological evidence for the gene and/or gene product                                                                                                                                                                                                                               | Reference(s)                                                                                      |
|------------------------------------------------------------------------------------|------------------------------------------------------------------------------------------------------------------------------------------------------------------------------------------------------------------------------------------------------------------------------------|---------------------------------------------------------------------------------------------------|
| <b>Chromosome organization (biological function), GO:0051276</b>                   |                                                                                                                                                                                                                                                                                    |                                                                                                   |
| <i>nopo</i>                                                                        | Fly homolog of human E3 ligase TRIP; interacts with DNA polymerase $\eta$ , regulates S to M transition during syncytial nuclear divisions.                                                                                                                                        | (Wallace et al. 2014)<br>(Merkle et al. 2009)                                                     |
| <i>AGO1</i>                                                                        | Component of miRNA-specific silencing machinery; was shown to regulate nuclear organization of PcG target loci.                                                                                                                                                                    | (Williams and Rubin 2002)<br>(Grimaud et al. 2006)                                                |
| <i>CG3358</i>                                                                      | Fly ortholog of TatD-related DNase TATDN1 that plays an important role in mitotic chromosome segregation.                                                                                                                                                                          | (Yang et al. 2012)                                                                                |
| <i>Sep5</i>                                                                        | Nuclear GTPase and a component of microtubule-associated complex involved in cytokinesis.                                                                                                                                                                                          | (Hughes et al. 2008)<br>(Goldstein and Gunawardena 2000)                                          |
| <i>E(Pc)</i>                                                                       | Contributes to chromatin-dependent silencing; is not present in PRC1 or PRC2 but, rather, is a subunit of histone acetyltransferase complex TIP60 involved in both gene activation and repression; interacts with <i>ISWI</i> , which is involved in H1 deposition into chromatin. | (Sinclair et al. 1998)<br>(Stankunas et al. 1998)<br>(Kusch et al. 2004)<br>(Arancio et al. 2010) |
| <i>Elba2</i>                                                                       | BEN domain-containing protein; associates with the <i>Fab-7</i> boundary/insulator element, promotes chromatin silencing.                                                                                                                                                          | (Aoki et al. 2012)                                                                                |
| <i>Socs36E</i>                                                                     | SH2 domain-containing suppressor of cytokine signaling; a negative regulator of the JAK/STAT cascade, which is involved, together with H1, in the establishment of heterochromatin silencing.                                                                                      | (Singh et al. 2010)<br>(Xu et al. 2014)                                                           |
| <i>c(2)M</i>                                                                       | Component of the synaptonemal complex; required for reciprocal meiotic recombination.                                                                                                                                                                                              | (Heidmann et al. 2004)                                                                            |
| <i>Chd1</i>                                                                        | ATP-dependent nucleosome remodeling motor protein; essential for chromatin assembly in the nascent male pronucleus and for deposition of H3.3 at transcriptionally active loci.                                                                                                    | (Konev et al. 2007)                                                                               |
| <b>DNA binding (molecular function), GO:0003677</b>                                |                                                                                                                                                                                                                                                                                    |                                                                                                   |
| <i>bsh</i>                                                                         | Brain-specific homeobox protein.                                                                                                                                                                                                                                                   | (Hasegawa et al. 2013)                                                                            |
| <i>vis</i>                                                                         | Homeobox-containing TGIF-related transactivator.                                                                                                                                                                                                                                   | (Hyman et al. 2003)                                                                               |
| <i>inv</i>                                                                         | Helix-turn-helix transcription factor.                                                                                                                                                                                                                                             | (Simmonds et al. 1995)                                                                            |
| <i>zf30C</i>                                                                       | Zinc finger transcription factor.                                                                                                                                                                                                                                                  | (Jafari et al. 2012)                                                                              |
| <i>CG3358</i>                                                                      | Fly ortholog of TatD-related DNase TATDN1.                                                                                                                                                                                                                                         | (Yang et al. 2012)                                                                                |
| <i>CG12744</i>                                                                     | Zinc finger transcription factor.                                                                                                                                                                                                                                                  | (Jin et al. 2008)                                                                                 |
| <i>lola</i>                                                                        | Zinc finger transcription factor.                                                                                                                                                                                                                                                  | (Giniger et al. 1994)                                                                             |
| <i>Elba2</i>                                                                       | BEN domain-containing protein, associates with the <i>Fab-7</i> element.                                                                                                                                                                                                           | (Aoki et al. 2012)                                                                                |
| <i>Chd1</i>                                                                        | ATP-dependent nucleosome remodeling motor protein.                                                                                                                                                                                                                                 | (Konev et al. 2007)                                                                               |
| <i>c(2)M</i>                                                                       | Component of the synaptonemal complex.                                                                                                                                                                                                                                             | (Heidmann et al. 2004)                                                                            |
| <b>Small GTPase-mediated signal transduction (biological function), GO:0007264</b> |                                                                                                                                                                                                                                                                                    |                                                                                                   |
| <i>phyl</i>                                                                        | Regulator of Notch and Wnt signaling pathways.                                                                                                                                                                                                                                     | (Nagaraj and Banerjee 2009)                                                                       |
| <i>CG15611</i>                                                                     | Exhibits sequence similarity to fly Rho guanyl-nucleotide exchange factor TRIO.                                                                                                                                                                                                    | (Bateman et al. 2000)                                                                             |
| <i>CG8155</i>                                                                      | Structurally similar to fly Rab GTPase activator Evi5.                                                                                                                                                                                                                             | (Laflamme et al. 2012)                                                                            |
| <i>GEFmeso</i>                                                                     | Mesoderm guanine nucleotide exchange, a binding target of Ras-like GTPase Ral.                                                                                                                                                                                                     | (Blanke and Jackle 2006)                                                                          |
| <i>RtGEF</i>                                                                       | Homologous to mammalian Rho-type guanyl-nucleotide exchange factor Pix.                                                                                                                                                                                                            | (Manser et al. 1998)                                                                              |
| <i>Arf51F</i>                                                                      | GTP-binding protein according to sequence similarity to human ADP-ribosylation factor 2, Arf2.                                                                                                                                                                                     | (Bobak et al. 1989)                                                                               |
| <i>Sep5</i>                                                                        | Belongs to the superfamily of Septin GTPases.                                                                                                                                                                                                                                      | (O'Neill and Clark 2013)                                                                          |
| <b>Gametogenesis (biological function), GO:0048477, GO:0007283</b>                 |                                                                                                                                                                                                                                                                                    |                                                                                                   |
| <i>gbb</i>                                                                         | Fly ortholog of human bone morphogenic protein-5 (BMP-5); was shown to be involved in BMP signaling that controls ovarian cell development.                                                                                                                                        | (Kirilly et al. 2005)                                                                             |
| <i>vis</i>                                                                         | Transcription factor; required for regulation of multiple genes involved in sperm manufacture; mutants are male sterile due to a defect in primary                                                                                                                                 | (Ayyar et al. 2003)                                                                               |

|                                                                                                             |                                                                                                                                                                                                                                                                          |                                                                             |
|-------------------------------------------------------------------------------------------------------------|--------------------------------------------------------------------------------------------------------------------------------------------------------------------------------------------------------------------------------------------------------------------------|-----------------------------------------------------------------------------|
|                                                                                                             | spermatocyte differentiation before the onset of meiotic divisions.                                                                                                                                                                                                      |                                                                             |
| <i>TBCB</i>                                                                                                 | Tubulin-binding cofactor B, a ubiquitin-related domain-containing protein; regulates microtubule organization in the nucleus and controls oocyte polarity.                                                                                                               | (Baffet et al. 2012)                                                        |
| <i>AGO1</i>                                                                                                 | Plays central roles in female germ-line cell differentiation.                                                                                                                                                                                                            | (Yang et al. 2007)                                                          |
| <i>Arf51F</i>                                                                                               | ADP ribosylation factor; is required for cytokinesis in spermatocytes.                                                                                                                                                                                                   | (Dyer et al. 2007)                                                          |
| <i>stau</i>                                                                                                 | dsRNA- and mRNA 3'-UTR-binding protein; regulates translation and mRNA localization of egg polarity genes <i>bicoid</i> , <i>gurken</i> , <i>nanos</i> and <i>oskar</i> .                                                                                                | (Johnstone and Lasko 2001)                                                  |
| <i>Lar</i>                                                                                                  | Leukocyte antigen-related-like tyrosine phosphatase receptor protein; required for the establishment of cell polarity during oogenesis.                                                                                                                                  | (Krueger et al. 2003)                                                       |
| <i>Edtp</i>                                                                                                 | Egg-derived tyrosine phosphatase; essential for ovarian development, oogenesis and embryogenesis.                                                                                                                                                                        | (Yamaguchi et al. 2005)                                                     |
| <i>Socs36E</i>                                                                                              | Functions in male germ-line stem cell maintenance.                                                                                                                                                                                                                       | (Issigonis et al. 2009)<br>(Singh et al. 2010)                              |
| <i>pAbp</i>                                                                                                 | Polyadenylate-binding protein; essential for spermatid elongation; translationally regulates Grk ( <i>gurken</i> ), which is required for the establishment of the dorsal-ventral axis of a developing egg.                                                              | (Pertceva et al. 2010)<br>(Clouse et al. 2008)                              |
| <i>Chd1</i>                                                                                                 | SNF2-like ATPase; functions in oogenesis and egg fertilization.                                                                                                                                                                                                          | (Konev et al. 2007)<br>(McDaniel et al. 2008)                               |
| <b>Nervous system development and neural system processes (biological function), GO:0007399, GO:0050877</b> |                                                                                                                                                                                                                                                                          |                                                                             |
| <i>Dap160</i>                                                                                               | Dynamin-associated protein, contains EF-hand and SH3 domains, a negative regulator of Notch signaling; interacts with the atypical protein kinase C (aPKC) to stimulate neuroblast proliferation; similar to dynamin, regulates synaptic vesicle endocytosis.            | (Chabu and Doe 2008)<br>(Koh et al. 2004)                                   |
| <i>bsh</i>                                                                                                  | Transcription factor; regulates neuronal identity specification.                                                                                                                                                                                                         | (Hasegawa et al. 2013)                                                      |
| <i>phyl</i>                                                                                                 | Zinc-binding protein; essential for the peripheral nervous system development and photoreceptor differentiation.                                                                                                                                                         | (Chang et al. 1995)                                                         |
| <i>gbb</i>                                                                                                  | Part of the BMP signaling pathway; important for the neuromuscular junction development and synaptic transmission.                                                                                                                                                       | (James and Broihier 2011)                                                   |
| <i>CG5742</i>                                                                                               | Predicted ankyrin repeat-containing protein; was found to regulate neurogenesis in an RNAi screen in vivo in <i>Drosophila</i> .                                                                                                                                         | (Neumuller et al. 2011)                                                     |
| <i>inv</i>                                                                                                  | Transcription factor; regulates neuroblast fate determination.                                                                                                                                                                                                           | (Bhat and Schedl 1997)                                                      |
| <i>lea</i>                                                                                                  | Axon guidance receptor; regulates neuron migration.                                                                                                                                                                                                                      | (Simpson et al. 2000)<br>(Kraut and Zinn 2004)                              |
| <i>zf30C</i>                                                                                                | Transcription factor; regulates dendrite morphology in the developing brain.                                                                                                                                                                                             | (Parrish et al. 2006)                                                       |
| <i>spict</i>                                                                                                | Magnesium transmembrane transporter orthologous to human NIPA1; negatively regulates BMP signaling to promote synaptic growth at the neuromuscular junction.                                                                                                             | (Wang et al. 2007)                                                          |
| <i>Pka-R2</i>                                                                                               | cAMP-dependent protein kinase R2; functions in repulsive axon guidance.                                                                                                                                                                                                  | (Terman and Kolodkin 2004)                                                  |
| <i>spi</i>                                                                                                  | TGF- $\alpha$ -like ligand that triggers epidermal growth factor receptor (EGFR) activation to promote neuroepithelial proliferation and neuroblast formation in the optic lobe; as a component of EGFR signaling pathway, is important for olfactory learning in flies. | (Morante et al. 2013)<br>(Rahn et al. 2013)                                 |
| <i>RtGEF</i>                                                                                                | Rho-type guanine nucleotide exchange factor; regulates postsynaptic structure and protein localization at the glutaminergic neuromuscular junction.                                                                                                                      | (Parnas et al. 2001)                                                        |
| <i>uzip</i>                                                                                                 | Cell adhesion protein; functions in axon guidance in the <i>Drosophila</i> central nervous system.                                                                                                                                                                       | (Ding et al. 2011)                                                          |
| <i>Arf51F</i>                                                                                               | GTP-binding protein; has a regulatory function in synaptic vesicle endocytosis.                                                                                                                                                                                          | (Lloyd et al. 2000)                                                         |
| <i>stau</i>                                                                                                 | Regulator of translation, a major player in the establishment of long-term memory and neuronal plasticity.                                                                                                                                                               | (Dubnau et al. 2003)                                                        |
| <i>lola</i>                                                                                                 | Transcription factor; regulates axonogenesis, brain morphogenesis and eye development.                                                                                                                                                                                   | (Giniger et al. 1994)<br>(Yamamoto et al. 2008)<br>(Zheng and Carthew 2008) |

|                                                                      |                                                                                                                                               |                          |
|----------------------------------------------------------------------|-----------------------------------------------------------------------------------------------------------------------------------------------|--------------------------|
| <i>Lar</i>                                                           | Tyrosine phosphatase receptor; plays a key role in the control of axon guidance.                                                              | (Krueger et al. 1996)    |
| <i>E(Pc)</i>                                                         | Together with other subunits of the TIP60 HAT complex regulates dendrite targeting of olfactory neurons.                                      | (Tea and Luo 2011)       |
| <b>Stress response (biological function), GO:0006955, GO:0006952</b> |                                                                                                                                               |                          |
| <i>nopo</i>                                                          | E3 ligase; likely plays a role in defense response, based on its homology with human TRAF-interacting protein TRIP.                           | (Lee et al. 1997)        |
| <i>coro</i>                                                          | WD40 repeat-containing protein; belongs to a family of proteins involved in defense response to fungus.                                       | (Jin et al. 2008)        |
| <i>Gbp</i>                                                           | Growth blocking peptide; a potent cytokine that stimulates the expression of anti-microbial peptides.                                         | (Tsuzuki et al. 2012)    |
| <i>lola</i>                                                          | Transcription factor; functions in anti-microbial humoral response.                                                                           | (Kleino et al. 2005)     |
| <i>CG13551</i>                                                       | ATPase inhibitor, glycine-rich protein; has an in vitro activity in suppressing Gram-positive bacteria.                                       | (Feng et al. 2009)       |
| <i>dnr1</i>                                                          | FERM domain- and RING finger-containing protein; an inhibitor of the immune deficiency (IMD) pathway at the level of initiator caspase Dredd. | (Guntermann et al. 2009) |
| <i>Jhl-21</i>                                                        | Leucine transmembrane transporter; belongs to a family of proteins involved in defense response to fungus.                                    | (Jin et al. 2008)        |
| <i>Traf4</i>                                                         | TNF receptor-associated factor; functions in the IMD pathway and plays a role in fly defense response to <i>Vibrio cholera</i> .              | (Berkey et al. 2009)     |

The known attributes and properties of genetic suppressors and enhancers of *His1* function in vivo that belong to enriched GO term classes are listed.
