# Supplementary material for: A Genetic Screen and Transcript Profiling Reveal a Shared Regulatory Program for Drosophila Linker Histone H1 and Chromatin Remodeler CHD1
Source: PubMed Central journal article supplement (PMC4390582; doi:10.1534/g3.115.016709), 2015-01-27
Supplement: supp_g3.115.016709_TableS2.pdf [file supp_g3.115.016709_TableS2.pdf]

Table S2 Overlap of transcripts regulated by CHD1, H1, HP1 and ISWI.

| SYMBOL/ TRANSCRIPT            | FLYBASE ID  | FOLD CHANGE |       |        |         |
|-------------------------------|-------------|-------------|-------|--------|---------|
|                               |             | <i>Chd1</i> | H1 KD | HP1 KD | ISWI KD |
| <b><i>Chd1</i> effect: UP</b> |             |             |       |        |         |
| <b>detoxification</b>         |             |             |       |        |         |
| <i>Gclc</i>                   | FBgn0040319 | 2.04        |       |        |         |
| <i>GstT4</i>                  | FBgn0030484 | 2.11        | 2.14  | 2.28   |         |
| <i>Cyp12b2</i>                | FBgn0034387 | 2.22        |       |        |         |
| <i>Cyp4ac3</i>                | FBgn0031695 | 2.25        | 29.44 |        |         |
| <i>Cyp18a1</i>                | FBgn0010383 | 2.28        |       |        |         |
| <i>Cyp28a5</i>                | FBgn0028940 | 2.30        | 2.27  |        |         |
| <i>Cyt-b5-r</i>               | FBgn0000406 | 2.57        | 10.17 |        | 0.393   |
| <i>GstD6</i>                  | FBgn0010042 | 2.68        | 13.24 |        |         |
| <i>CG4623</i>                 | FBgn0035587 | 3.16        |       |        |         |
| <i>Cyp9c1</i>                 | FBgn0015040 | 3.41        |       | 6.66   |         |
| <i>Cyp6a18</i>                | FBgn0039519 | 3.81        |       |        |         |
| <i>Ugt86Dj</i>                | FBgn0040250 | 3.92        |       |        |         |
| <i>Cyp9h1</i>                 | FBgn0033775 | 4.06        |       |        |         |
| <i>GstE6</i>                  | FBgn0063494 | 4.17        | 43.50 | 2.95   |         |
| <i>Cyp313a3</i>               | FBgn0038007 | 5.03        |       |        |         |
| <i>Cyp6a9</i>                 | FBgn0013771 | 5.28        | 2.30  |        |         |
| <i>Cyp4d8</i>                 | FBgn0015033 | 5.74        | 2.40  |        |         |
| <i>Cyp6a23</i>                | FBgn0033978 | 5.98        | 16.25 |        | 3.07    |
| <i>GstE7</i>                  | FBgn0063493 | 8.94        |       | 3.78   |         |
| <i>GstE5</i>                  | FBgn0063495 | 12.3        | 29.07 |        |         |
| <i>Cyp6a2</i>                 | FBgn0000473 | 30.5        |       | 2.21   |         |
| <i>Cyp4p2</i>                 | FBgn0033395 | 40.2        | 4.52  |        |         |
| <i>Cyp4e3</i>                 | FBgn0015035 | 73.0        | 7.07  |        |         |
| <b>development</b>            |             |             |       |        |         |
| <i>Iris</i>                   | FBgn0031305 | 2.00        |       |        |         |
| <i>ldgf3</i>                  | FBgn0020414 | 2.00        | 3.07  |        |         |
| <i>hts</i>                    | FBgn0263391 | 2.04        |       |        |         |
| <i>CG13461</i>                | FBgn0036468 | 2.14        | 5.69  |        |         |
| <i>Rbp9</i>                   | FBgn0010263 | 2.23        | 2.02  |        |         |
| <i>rad50</i>                  | FBgn0034728 | 2.27        | 7.96  |        |         |
| <i>PH4alphaSG2</i>            | FBgn0039779 | 2.35        |       |        |         |
| <i>mbl</i>                    | FBgn0265487 | 2.45        |       |        |         |
| CR_TC_RE65113                 |             | 2.51        |       |        |         |
| <i>CG42390</i>                | FBgn0259736 | 2.51        | 0.464 |        | 2.48    |
| <i>CG15784</i>                | FBgn0029766 | 2.68        | 3.42  |        |         |
| <i>Npc1b</i>                  | FBgn0261675 | 2.77        |       |        |         |
| <i>bol</i>                    | FBgn0011206 | 2.91        |       |        |         |
| <i>Glycogenin</i>             | FBgn0265191 | 2.95        |       |        |         |
| <i>lola</i>                   | FBgn0005630 | 3.12        |       |        |         |
| <i>CG14265</i>                | FBgn0040393 | 3.36        |       |        |         |
| <i>chinmo</i>                 | FBgn0086758 | 3.46        |       |        |         |
| <i>ine</i>                    | FBgn0011603 | 3.51        | 0.062 |        |         |
| <i>sens</i>                   | FBgn0002573 | 3.58        |       |        |         |
| <i>Atf3</i>                   | FBgn0028550 | 3.81        |       |        |         |
| <i>Jhl-26</i>                 | FBgn0028424 | 3.84        | 7.00  | 2.68   |         |
| <i>metro</i>                  | FBgn0050021 | 3.86        | 0.084 |        |         |

|                        |             |             |               |             |              |
|------------------------|-------------|-------------|---------------|-------------|--------------|
| <i>CG5867</i>          | FBgn0027586 | <b>3.97</b> |               |             |              |
| <i>Est-Q</i>           | FBgn0037090 | <b>4.06</b> | <b>5.17</b>   |             |              |
| <i>Ftz-f1</i>          | FBcl0153222 | <b>4.06</b> |               |             |              |
| <i>Dh44-R2</i>         | FBgn0033744 | <b>4.23</b> | <b>2.33</b>   |             |              |
| <i>chinmo</i>          | FBgn0086758 | <b>4.35</b> |               |             |              |
| <i>CG10918</i>         | FBgn0031178 | <b>4.76</b> |               |             |              |
| <i>smp-30</i>          | FBgn0038257 | <b>4.76</b> | <b>19.82</b>  |             |              |
| <i>tx</i>              | FBgn0263118 | <b>4.86</b> |               |             |              |
| <i>fru</i>             | FBgn0004652 | <b>5.13</b> | <b>2.85</b>   |             |              |
| <i>smp-30</i>          | FBgn0038257 | <b>5.46</b> | <b>19.82</b>  |             |              |
| <i>CG32694</i>         | FBgn0052694 | <b>5.54</b> |               |             |              |
| <i>Msp300</i>          | FBgn0261836 | <b>5.74</b> |               |             |              |
| <i>lcs</i>             | FBgn0028583 | <b>6.87</b> |               |             |              |
| <i>LP09368</i>         | FBcl0192001 | <b>7.94</b> |               |             |              |
| <i>CG32071</i>         | FBgn0052071 | <b>8.17</b> |               |             |              |
| <i>CG42368</i>         | FBgn0259714 | <b>42.2</b> | <b>0.471</b>  |             |              |
| <i>CG16898</i>         | FBgn0034480 | <b>69.1</b> | <b>6.66</b>   |             |              |
| <i>l(2)efl</i>         | FBgn0011296 | <b>85.6</b> |               |             |              |
| <b>immune response</b> |             |             |               |             |              |
| <i>kek5</i>            | FBgn0031016 | <b>2.01</b> |               |             |              |
| <i>Ect4</i>            | FBgn0262579 | <b>2.06</b> |               | <b>2.17</b> |              |
| <i>SPE</i>             | FBgn0039102 | <b>2.19</b> | <b>4.83</b>   |             |              |
| <i>Tsp42Eh</i>         | FBgn0033129 | <b>2.20</b> |               |             |              |
| <i>Sr-CI</i>           | FBgn0014033 | <b>2.46</b> | <b>4.37</b>   |             |              |
| <i>CG8562</i>          | FBgn0035779 | <b>2.57</b> |               |             |              |
| <i>dl</i>              | FBgn0260632 | <b>2.57</b> |               |             |              |
| <i>ea</i>              | FBgn0000533 | <b>2.60</b> |               |             |              |
| <i>Tsp42Eg</i>         | FBgn0033128 | <b>2.62</b> |               |             |              |
| <i>ninaD</i>           | FBgn0002939 | <b>2.71</b> |               |             |              |
| <i>PebIII</i>          | FBgn0011695 | <b>2.85</b> |               |             |              |
| <i>Phae2</i>           | FBgn0263235 | <b>2.85</b> |               |             |              |
| <i>alpha-Est2</i>      | FBgn0015570 | <b>2.85</b> | <b>2.17</b>   |             |              |
| <i>TBCB</i>            | FBgn0034451 | <b>2.97</b> |               |             |              |
| <i>CG10433</i>         | FBgn0034638 | <b>3.05</b> | <b>3.25</b>   |             | <b>0.487</b> |
| <i>CG5597</i>          | FBgn0034920 | <b>3.07</b> |               |             |              |
| <i>Ect4</i>            | FBgn0262579 | <b>3.12</b> |               | <b>2.17</b> |              |
| <i>NimB1</i>           | FBgn0027929 | <b>3.18</b> |               |             |              |
| <i>CG15255</i>         | FBgn0028950 | <b>3.46</b> |               |             |              |
| <i>NimC1</i>           | FBgn0259896 | <b>3.51</b> |               |             |              |
| <i>CG3775</i>          | FBgn0030425 | <b>3.53</b> |               |             |              |
| <i>CG5791</i>          | FBgn0040582 | <b>3.58</b> |               |             |              |
| <i>Ser6</i>            | FBgn0011834 | <b>3.78</b> |               |             |              |
| <i>CG13947</i>         | FBgn0031277 | <b>4.14</b> | <b>2.26</b>   |             |              |
| <i>CG7248</i>          | FBgn0036229 | <b>4.23</b> |               |             |              |
| <i>CG5550</i>          | FBgn0034160 | <b>4.38</b> |               |             |              |
| <i>PGRP-SC1b</i>       | FBgn0033327 | <b>4.47</b> |               |             |              |
| <i>CG15293</i>         | FBgn0028526 | <b>4.50</b> | <b>5.16</b>   |             |              |
| <i>CG8620</i>          | FBgn0040837 | <b>4.89</b> | <b>160.83</b> |             |              |
| <i>mthl8</i>           | FBgn0052475 | <b>4.99</b> | <b>3.29</b>   |             |              |
| <i>CG17974</i>         | FBgn0034624 | <b>5.46</b> |               |             |              |
| <i>spherioide</i>      | FBgn0030774 | <b>5.74</b> |               |             |              |
| <i>CG13324</i>         | FBgn0033789 | <b>5.78</b> |               |             |              |

|                                |             |             |              |             |             |
|--------------------------------|-------------|-------------|--------------|-------------|-------------|
| <i>CG9928</i>                  | FBgn0032472 | <b>5.86</b> | <b>19.55</b> |             |             |
| <i>TotC</i>                    | FBgn0044812 | <b>6.15</b> | <b>58.64</b> |             |             |
| <i>CG18179</i>                 | FBgn0036023 | <b>6.32</b> |              |             |             |
| <i>Muc68Ca</i>                 | FBgn0036181 | <b>7.36</b> |              |             | <b>2.07</b> |
| <i>CG33178</i>                 | FBgn0053178 | <b>7.36</b> |              |             |             |
| <i>CG5778</i>                  | FBgn0038930 | <b>7.57</b> | <b>27.36</b> |             |             |
| <i>Fmo-2</i>                   | FBgn0033079 | <b>9.00</b> | <b>9.77</b>  |             |             |
| <i>CG14419</i>                 | FBgn0029639 | <b>12.1</b> |              |             |             |
| <i>CG16775</i>                 | FBgn0036767 | <b>13.9</b> |              |             |             |
| <i>Prx2540-2</i>               | FBgn0033518 | <b>27.1</b> | <b>0.483</b> |             |             |
| <i>Mdr50</i>                   | FBgn0010241 | <b>54.6</b> |              |             |             |
| <b>intracellular processes</b> |             |             |              |             |             |
| <i>larp</i>                    | FBgn0261618 | <b>2.01</b> |              |             |             |
| <i>Sec31</i>                   | FBgn0033339 | <b>2.01</b> | <b>0.483</b> |             |             |
| <i>dm</i>                      | FBgn0262656 | <b>2.03</b> |              |             |             |
| <i>stau</i>                    | FBgn0003520 | <b>2.06</b> |              |             |             |
| <i>mTTF</i>                    | FBgn0028530 | <b>2.10</b> |              |             |             |
| <i>qlss</i>                    | FBgn0051005 | <b>2.10</b> |              |             |             |
| <i>Ndae1</i>                   | FBgn0259111 | <b>2.10</b> | <b>0.357</b> | <b>4.82</b> |             |
| <i>Nf1</i>                     | FBgn0015269 | <b>2.14</b> |              |             |             |
| <i>CG8503</i>                  | FBgn0033917 | <b>2.23</b> |              |             |             |
| <i>form3</i>                   | FBgn0053556 | <b>2.28</b> |              |             |             |
| <i>Msp300</i>                  | FBgn0261836 | <b>2.38</b> |              |             |             |
| <i>CG5599</i>                  | FBgn0030612 | <b>2.41</b> |              |             |             |
| <i>mbl</i>                     | FBgn0265487 | <b>2.53</b> |              |             |             |
| <i>CG2681</i>                  | FBgn0024997 | <b>2.68</b> |              |             |             |
| <i>lrbp</i>                    | FBgn0011774 | <b>2.71</b> | <b>14.23</b> |             |             |
| <i>CG3328</i>                  | FBgn0034985 | <b>2.75</b> |              |             |             |
| <i>GluRIIC</i>                 | FBgn0046113 | <b>2.75</b> |              |             |             |
| <i>phr</i>                     | FBgn0003082 | <b>2.79</b> |              |             |             |
| <i>Obp56a</i>                  | FBgn0034468 | <b>2.79</b> |              |             |             |
| <i>CG5205</i>                  | FBgn0038344 | <b>2.89</b> | <b>2.44</b>  |             |             |
| <i>CG44085</i>                 | FBgn0264894 | <b>2.91</b> |              |             |             |
| <i>Diver</i>                   |             | <b>3.03</b> | <b>3.62</b>  |             |             |
| <i>CG30118</i>                 | FBgn0050118 | <b>3.03</b> | <b>2.00</b>  |             |             |
| <i>CG6503</i>                  | FBgn0040606 | <b>3.05</b> | <b>10.18</b> |             |             |
| <i>ng3</i>                     | FBgn0010295 | <b>3.05</b> |              |             |             |
| <i>zormin</i>                  | FBgn0052311 | <b>3.34</b> | <b>0.456</b> |             |             |
| <i>ps</i>                      | FBgn0261552 | <b>3.34</b> |              |             |             |
| <i>Skeletor</i>                | FBgn0262717 | <b>3.48</b> |              |             |             |
| <i>CG14661</i>                 | FBgn0037288 | <b>3.68</b> |              |             |             |
| <i>CG6910</i>                  | FBgn0036262 | <b>3.73</b> | <b>2.65</b>  |             |             |
| <i>CG12863</i>                 | FBgn0033948 | <b>3.78</b> |              |             |             |
| <i>CG30285</i>                 | FBgn0050285 | <b>4.35</b> | <b>4.04</b>  |             |             |
| <i>CG44013</i>                 | FBgn0264775 | <b>4.89</b> |              |             |             |
| <i>Ude</i>                     | FBgn0039226 | <b>5.03</b> |              |             | <b>3.85</b> |
| <i>CG2120</i>                  | FBgn0030005 | <b>5.28</b> |              |             |             |
| <i>CG44013</i>                 | FBgn0264775 | <b>5.46</b> |              |             |             |
| <i>tobi</i>                    | FBgn0261575 | <b>5.94</b> |              |             |             |
| <i>CG6839</i>                  | FBgn0036831 | <b>6.06</b> |              |             |             |
| <i>CG7299</i>                  | FBgn0032282 | <b>6.63</b> |              |             |             |
| <i>CG11659</i>                 | FBgn0038731 | <b>7.21</b> |              |             |             |

|                    |             |             |              |             |             |
|--------------------|-------------|-------------|--------------|-------------|-------------|
| <i>CG5070</i>      | FBgn0030824 | <b>8.69</b> |              |             |             |
| <i>CG9757</i>      | FBgn0003060 | <b>16.8</b> |              |             |             |
| <b>metabolism</b>  |             |             |              |             |             |
| <i>CG30427</i>     | FBgn0043792 | <b>2.00</b> |              |             |             |
| <i>CG7149</i>      | FBgn0031948 | <b>2.00</b> |              |             |             |
| <i>Evi5</i>        | FBgn0262740 | <b>2.01</b> |              |             |             |
| <i>CG3902</i>      | FBgn0036824 | <b>2.03</b> |              |             |             |
| <i>CG11453</i>     | FBgn0038734 | <b>2.04</b> |              |             |             |
| <i>CG15534</i>     | FBgn0039769 | <b>2.11</b> |              |             |             |
| <i>Marf</i>        | FBgn0029870 | <b>2.11</b> |              |             |             |
| <i>CG40486</i>     | FBgn0263830 | <b>2.13</b> |              |             |             |
| <i>Unc-115b</i>    | FBgn0260463 | <b>2.14</b> |              |             |             |
| <i>CG9674</i>      | FBgn0036663 | <b>2.16</b> |              |             |             |
| <i>CG3523</i>      | FBgn0027571 | <b>2.16</b> | <b>2.37</b>  |             |             |
| <i>CG6733</i>      | FBgn0039052 | <b>2.16</b> |              |             |             |
| <i>su(r)</i>       | FBgn0086450 | <b>2.17</b> | <b>3.20</b>  | <b>2.45</b> |             |
| <i>Men</i>         | FBgn0002719 | <b>2.20</b> | <b>4.11</b>  |             |             |
| <i>Amy-p</i>       | FBgn0000079 | <b>2.20</b> |              |             |             |
| <i>alpha-Est10</i> | FBgn0015569 | <b>2.22</b> | <b>3.40</b>  |             |             |
| <i>CG43340</i>     | FBgn0263077 | <b>2.22</b> |              | <b>3.00</b> |             |
| <i>CG32645</i>     | FBgn0052645 | <b>2.22</b> |              |             |             |
| <i>pgant4</i>      | FBgn0051956 | <b>2.22</b> |              |             |             |
| <i>CG17322</i>     | FBgn0027070 | <b>2.22</b> |              |             |             |
| <i>CG31475</i>     | FBgn0051475 | <b>2.23</b> |              |             |             |
| <i>AdSS</i>        | FBgn0027493 | <b>2.23</b> | <b>2.01</b>  |             |             |
| <i>GstZ2</i>       | FBgn0037697 | <b>2.25</b> |              |             |             |
| <i>nemy</i>        | FBgn0261673 | <b>2.27</b> |              |             |             |
| <i>Ugt86Da</i>     | FBgn0040259 | <b>2.28</b> | <b>8.97</b>  | <b>2.71</b> |             |
| <i>CAHbeta</i>     | FBgn0037646 | <b>2.30</b> |              |             |             |
| <i>CG7920</i>      | FBgn0039737 | <b>2.30</b> |              |             |             |
| <i>Pepck</i>       | FBgn0003067 | <b>2.30</b> |              | <b>4.99</b> | <b>2.84</b> |
| <i>Spat</i>        | FBgn0014031 | <b>2.31</b> | <b>2.38</b>  |             |             |
| <i>Mocs1</i>       | FBgn0263241 | <b>2.31</b> |              |             |             |
| <i>CG32649</i>     | FBgn0052649 | <b>2.31</b> |              |             |             |
| <i>Pkc53E</i>      | FBgn0003091 | <b>2.33</b> | <b>0.340</b> |             |             |
| <i>CG14655</i>     | FBgn0037275 | <b>2.33</b> |              |             |             |
| <i>CG13397</i>     | FBgn0014417 | <b>2.33</b> |              |             |             |
| <i>CG8129</i>      | FBgn0037684 | <b>2.35</b> | <b>2.00</b>  |             |             |
| <i>Ac78C</i>       | FBgn0024150 | <b>2.38</b> |              |             |             |
| <i>Kua</i>         | FBgn0032850 | <b>2.38</b> |              |             |             |
| <i>Ca-P60A</i>     | FBgn0263006 | <b>2.43</b> |              |             |             |
| <i>CG11162</i>     | FBgn0030509 | <b>2.43</b> |              |             |             |
| <i>CG32557</i>     | FBgn0052557 | <b>2.46</b> |              |             |             |
| <i>Uro</i>         | FBgn0003961 | <b>2.48</b> | <b>2.13</b>  |             |             |
| <i>CG3597</i>      | FBgn0031417 | <b>2.48</b> | <b>2.08</b>  |             |             |
| <i>CG3301</i>      | FBgn0038878 | <b>2.48</b> | <b>0.448</b> |             |             |
| <i>Aldh</i>        | FBgn0012036 | <b>2.48</b> | <b>2.56</b>  |             |             |
| <i>CG5704</i>      | FBgn0026570 | <b>2.50</b> | <b>2.10</b>  |             |             |
| <i>CG1315</i>      | FBgn0026565 | <b>2.51</b> |              |             |             |
| <i>Ugt35a</i>      | FBgn0026315 | <b>2.53</b> | <b>3.35</b>  | <b>2.47</b> |             |
| <i>drd</i>         | FBgn0260006 | <b>2.55</b> |              |             |             |
| <i>ACC</i>         | FBgn0033246 | <b>2.57</b> | <b>7.19</b>  |             |             |

|                   |             |             |              |             |              |
|-------------------|-------------|-------------|--------------|-------------|--------------|
| <i>Tdc1</i>       | FBgn0259977 | <b>2.57</b> |              |             |              |
| <i>CG1673</i>     | FBgn0030482 | <b>2.58</b> |              |             |              |
| <i>AOX1</i>       | FBgn0267408 | <b>2.60</b> |              |             |              |
| <i>Gpdh</i>       | FBgn0001128 | <b>2.62</b> | <b>2.22</b>  |             |              |
| <i>CG1774</i>     | FBgn0039856 | <b>2.64</b> |              |             |              |
| <i>CG10175</i>    | FBgn0039084 | <b>2.66</b> | <b>0.481</b> |             |              |
| <i>Jheh3</i>      | FBgn0034406 | <b>2.68</b> |              | <b>6.01</b> |              |
| <i>CG10827</i>    | FBgn0038845 | <b>2.68</b> |              |             |              |
| <i>Gad1</i>       | FBgn0004516 | <b>2.73</b> |              |             |              |
| <i>Est-6</i>      | FBgn0000592 | <b>2.77</b> | <b>7.32</b>  |             |              |
| <i>CG33093</i>    | FBgn0053093 | <b>2.79</b> | <b>7.39</b>  |             |              |
| <i>CG6074</i>     | FBgn0039486 | <b>2.79</b> | <b>23.77</b> |             |              |
| <i>Tie</i>        | FBgn0014073 | <b>2.81</b> | <b>0.205</b> |             |              |
| <i>CG8128</i>     | FBgn0030668 | <b>2.83</b> |              |             |              |
| <i>alpha-Est8</i> | FBgn0015576 | <b>2.83</b> |              |             | <b>0.374</b> |
| <i>CG5707</i>     | FBgn0026593 | <b>2.87</b> |              |             |              |
| <i>CG13311</i>    | FBgn0035929 | <b>2.89</b> |              |             |              |
| <i>Obp56e</i>     | FBgn0034471 | <b>2.89</b> |              |             |              |
| <i>l(1)G0196</i>  | FBgn0027279 | <b>2.89</b> |              |             |              |
| <i>CG14787</i>    | FBgn0027793 | <b>2.91</b> |              |             | <b>17.33</b> |
| <i>CG3841</i>     | FBgn0032131 | <b>2.95</b> |              |             |              |
| <i>CG9993</i>     | FBgn0034553 | <b>2.97</b> |              |             |              |
| <i>sls</i>        | FBgn0086906 | <b>3.10</b> | <b>0.081</b> |             |              |
| <i>CG30503</i>    | FBgn0050503 | <b>3.14</b> | <b>0.392</b> |             | <b>2.60</b>  |
| <i>CG14762</i>    | FBgn0033250 | <b>3.16</b> | <b>33.48</b> |             |              |
| <i>CG10165</i>    | FBgn0032801 | <b>3.16</b> | <b>3.66</b>  |             |              |
| <i>Gbs-76A</i>    | FBgn0036862 | <b>3.18</b> |              |             |              |
| <i>Ugt86Dh</i>    | FBgn0040252 | <b>3.29</b> |              |             |              |
| <i>CG7025</i>     | FBgn0031930 | <b>3.29</b> |              |             |              |
| <i>Cyp18a1</i>    | FBgn0010383 | <b>3.32</b> |              |             |              |
| <i>Npc2h</i>      | FBgn0039801 | <b>3.32</b> | <b>5.23</b>  |             |              |
| <i>Gpo-1</i>      | FBgn0022160 | <b>3.32</b> | <b>3.37</b>  |             | <b>0.493</b> |
| <i>RluA-1</i>     | FBgn0051719 | <b>3.34</b> |              |             |              |
| <i>Ork1</i>       | FBgn0017561 | <b>3.36</b> | <b>11.63</b> |             |              |
| <i>Mipp1</i>      | FBgn0026061 | <b>3.36</b> | <b>4.33</b>  |             |              |
| <i>CG15879</i>    | FBgn0035309 | <b>3.39</b> |              |             |              |
| <i>CG42329</i>    | FBgn0259229 | <b>3.41</b> | <b>3.51</b>  |             |              |
| <i>CG9466</i>     | FBgn0032068 | <b>3.48</b> |              |             |              |
| <i>CG8708</i>     | FBgn0033271 | <b>3.58</b> | <b>3.21</b>  |             |              |
| <i>CG3835</i>     | FBgn0023507 | <b>3.58</b> | <b>3.69</b>  |             |              |
| <i>sls</i>        | FBgn0086906 | <b>3.63</b> | <b>0.081</b> |             |              |
| <i>fa2h</i>       | FBgn0050502 | <b>3.66</b> |              |             |              |
| <i>CG1461</i>     | FBgn0030558 | <b>3.66</b> |              |             |              |
| <i>CG8629</i>     | FBgn0035742 | <b>3.89</b> |              |             |              |
| <i>CG10592</i>    | FBgn0035619 | <b>3.97</b> |              |             |              |
| <i>CG15117</i>    | FBgn0034417 | <b>4.06</b> |              |             |              |
| <i>CG32170</i>    | FBgn0052170 | <b>4.06</b> |              |             |              |
| <i>Unc-89</i>     | FBgn0053519 | <b>4.06</b> |              |             |              |
| <i>St3</i>        | FBgn0265052 | <b>4.08</b> |              |             |              |
| <i>Gpdh</i>       | FBgn0001128 | <b>4.29</b> | <b>2.22</b>  |             |              |
| <i>Mlc2</i>       | FBgn0002773 | <b>4.29</b> | <b>2.31</b>  |             |              |
| <i>arg</i>        | FBgn0023535 | <b>4.35</b> | <b>5.01</b>  |             |              |

|                    |             |      |       |      |      |
|--------------------|-------------|------|-------|------|------|
| CS-2               | FBgn0029091 | 4.50 |       |      |      |
| CG17843            | FBgn0038919 | 4.50 |       |      |      |
| AOX2               | FBgn0038348 | 4.69 |       |      |      |
| <i>glob1</i>       | FBgn0027657 | 4.72 | 6.42  |      |      |
| CG30457            | FBgn0050457 | 4.79 |       |      |      |
| CG9743             | FBgn0039756 | 5.10 | 2.17  |      |      |
| CG32751            | FBgn0052751 | 5.13 |       |      |      |
| CG9468             | FBgn0032069 | 5.13 |       |      |      |
| CG4753             | FBgn0036622 | 5.13 | 8.81  |      |      |
| CG42249            | FBgn0259101 | 5.28 |       |      |      |
| CG12512            | FBgn0031703 | 5.31 | 11.53 |      |      |
| <i>Apoltp</i>      | FBgn0032136 | 5.70 | 2.89  | 2.39 | 2.22 |
| CG5150             | FBgn0035620 | 6.28 |       |      |      |
| <i>vanin-like</i>  | FBgn0040069 | 7.57 |       |      |      |
| CG8630             | FBgn0038130 | 8.22 |       |      |      |
| CG3106             | FBgn0030148 | 8.63 |       |      |      |
| CG14022            | FBgn0031700 | 8.69 |       |      |      |
| <i>Odc2</i>        | FBgn0013308 | 9.45 |       |      |      |
| CG14205            | FBgn0031034 | 13.4 |       |      |      |
| <i>frac</i>        | FBgn0035798 | 20.3 |       |      |      |
| <i>Jhedup</i>      | FBgn0034076 | 21.3 |       |      |      |
| CG11796            | FBgn0036992 | 22.9 |       |      |      |
| <i>hgo</i>         | FBgn0040211 | 23.4 |       |      |      |
| CG4716             | FBgn0033820 | 32.0 | 11.77 |      |      |
| CG4716             | FBgn0033820 | 61.8 | 11.77 |      |      |
| CG4757             | FBgn0027584 | 190  | 5.27  |      |      |
| <b>proteolysis</b> |             |      |       |      |      |
| CG9505             | FBgn0031805 | 2.00 | 2.72  |      |      |
| CG18417            | FBgn0035780 | 2.01 |       |      |      |
| CG31821            | FBgn0051821 | 2.08 |       |      |      |
| <i>Try29F</i>      | FBgn0015316 | 2.10 | 2.28  |      |      |
| CG18493            | FBgn0038701 | 2.14 |       |      |      |
| CG4721             | FBgn0039024 | 2.14 | 2.82  |      |      |
| CG17739            | FBgn0033710 | 2.14 |       |      |      |
| CG4725             | FBgn0039022 | 2.20 |       |      |      |
| <i>Kaz-m1</i>      | FBgn0002578 | 2.30 |       |      |      |
| <i>l(2)34Fc</i>    | FBgn0261534 | 2.33 |       |      |      |
| <i>scaf</i>        | FBgn0033033 | 2.33 |       |      |      |
| CG6225             | FBgn0038072 | 2.38 |       |      |      |
| CG16712            | FBgn0031561 | 2.48 | 7.20  | 2.68 |      |
| <i>Bace</i>        | FBgn0032049 | 2.48 |       |      |      |
| <i>iotaTry</i>     | FBgn0015001 | 2.50 |       |      |      |
| <i>stv</i>         | FBgn0086708 | 2.53 |       | 4.30 |      |
| CG17477            | FBgn0038479 | 2.58 |       |      |      |
| CG30043            | FBgn0050043 | 2.66 |       |      |      |
| CG6337             | FBgn0033873 | 2.71 |       |      |      |
| CG32483            | FBgn0052483 | 2.77 |       |      | 7.18 |
| CG6048             | FBgn0029827 | 2.87 |       |      |      |
| CG5246             | FBgn0038484 | 2.91 |       |      |      |
| CG3604             | FBgn0031562 | 2.91 | 3.70  |      |      |
| <i>zetaTry</i>     | FBgn0011556 | 2.99 |       |      |      |
| <i>Nep1</i>        | FBgn0029843 | 3.03 |       |      |      |

|                         |             |             |              |              |             |
|-------------------------|-------------|-------------|--------------|--------------|-------------|
| <i>CG4053</i>           | FBgn0038482 | <b>3.10</b> |              |              |             |
| <i>CG10472</i>          | FBgn0035670 | <b>3.16</b> |              |              |             |
| <i>CG11961</i>          | FBgn0034436 | <b>3.25</b> |              |              |             |
| <i>CG17475</i>          | FBgn0038481 | <b>3.25</b> |              |              |             |
| <i>CG13160</i>          | FBgn0033720 | <b>3.41</b> |              |              |             |
| <i>CG17134</i>          | FBgn0032304 | <b>3.43</b> |              |              |             |
| <i>CG10051</i>          | FBgn0034437 | <b>3.81</b> |              |              |             |
| <i>CG33127</i>          | FBgn0053127 | <b>3.84</b> |              |              |             |
| <i>CG33459</i>          | FBgn0053459 | <b>3.86</b> | <b>10.43</b> |              |             |
| <i>CG30371</i>          | FBgn0050371 | <b>4.08</b> | <b>0.160</b> |              |             |
| <i>CG31233</i>          | FBgn0051233 | <b>4.14</b> |              |              |             |
| <i>kappaTry</i>         | FBgn0043471 | <b>4.38</b> |              |              |             |
| <i>CG4653</i>           | FBgn0030776 | <b>4.41</b> |              |              |             |
| <i>CG31343</i>          | FBgn0051343 | <b>4.41</b> | <b>12.63</b> |              |             |
| <i>lambdaTry</i>        | FBgn0043470 | <b>4.47</b> |              |              |             |
| <i>Sp212</i>            | FBgn0053329 | <b>4.82</b> |              |              |             |
| <i>CG1304</i>           | FBgn0031141 | <b>5.35</b> |              |              |             |
| <i>CG3513</i>           | FBgn0031559 | <b>5.35</b> | <b>11.02</b> |              |             |
| <i>CG31198</i>          | FBgn0051198 | <b>5.58</b> |              |              |             |
| <i>CG8774</i>           | FBgn0038136 | <b>7.73</b> |              |              |             |
| <i>Spn47C</i>           | FBgn0033574 | <b>7.73</b> |              |              |             |
| <i>CG14820</i>          | FBgn0035718 | <b>8.00</b> |              |              |             |
| <i>CG31265</i>          | FBgn0051265 | <b>9.06</b> |              |              |             |
| <i>CG15254</i>          | FBgn0028949 | <b>14.7</b> |              |              |             |
| <b>signaling</b>        |             |             |              |              |             |
| <i>PKD</i>              | FBgn0038603 | <b>2.04</b> |              | <b>4.00</b>  |             |
| <i>moody</i>            | FBgn0025631 | <b>2.06</b> | <b>2.28</b>  |              |             |
| <i>Syn</i>              | FBgn0004575 | <b>2.07</b> | <b>2.44</b>  |              |             |
| <i>Fas2</i>             | FBgn0000635 | <b>2.11</b> |              | <b>0.479</b> |             |
| <i>mthl6</i>            | FBgn0035789 | <b>2.14</b> |              |              |             |
| <i>CrzR</i>             | FBgn0036278 | <b>2.16</b> |              |              |             |
| <i>Ag5r</i>             | FBgn0015010 | <b>2.19</b> | <b>6.17</b>  |              |             |
| <i>Tk</i>               | FBgn0037976 | <b>2.22</b> |              |              |             |
| <i>Galphaf</i>          | FBgn0010223 | <b>2.30</b> | <b>6.31</b>  |              |             |
| <i>Amph</i>             | FBgn0027356 | <b>2.35</b> |              |              |             |
| <i>Dh31-R</i>           | FBgn0052843 | <b>2.50</b> |              |              |             |
| <i>CG12290</i>          | FBgn0039419 | <b>2.57</b> |              |              |             |
| <i>CG7054</i>           | FBgn0038972 | <b>2.66</b> | <b>3.91</b>  |              |             |
| <i>Pkcdelta</i>         | FBgn0259680 | <b>2.71</b> |              |              |             |
| <i>CG15529</i>          | FBgn0039748 | <b>2.83</b> |              |              |             |
| <i>Mctp</i>             | FBgn0034389 | <b>2.95</b> | <b>0.300</b> | <b>2.11</b>  | <b>2.25</b> |
| <i>Pde6</i>             | FBgn0038237 | <b>2.95</b> | <b>5.21</b>  |              |             |
| <i>CG5402</i>           | FBgn0039521 | <b>3.39</b> |              |              |             |
| <i>Ac76E</i>            | FBgn0004852 | <b>3.43</b> |              |              |             |
| <i>CG8907</i>           | FBgn0038466 | <b>3.48</b> | <b>2.81</b>  |              |             |
| <i>CG9498</i>           | FBgn0031801 | <b>4.56</b> | <b>3.62</b>  |              |             |
| <i>RyR</i>              | FBgn0011286 | <b>8.88</b> |              |              |             |
| <b>tissue structure</b> |             |             |              |              |             |
| <i>CAP</i>              | FBgn0033504 | <b>2.03</b> | <b>2.32</b>  |              |             |
| <i>Ag5r2</i>            | FBgn0020508 | <b>2.03</b> |              |              |             |
| <i>Cpr97Eb</i>          | FBgn0039481 | <b>2.04</b> |              |              |             |
| <i>LamC</i>             | FBgn0010397 | <b>2.08</b> |              |              | <b>2.95</b> |

|                    |             |             |              |             |  |
|--------------------|-------------|-------------|--------------|-------------|--|
| <i>CG8927</i>      | FBgn0038405 | <b>2.08</b> |              |             |  |
| <i>ldgf5</i>       | FBgn0064237 | <b>2.11</b> | <b>2.30</b>  |             |  |
| <i>Lcp65Af</i>     | FBgn0020639 | <b>2.14</b> |              |             |  |
| <i>CG14304</i>     | FBgn0038629 | <b>2.16</b> |              |             |  |
| <i>CG7298</i>      | FBgn0036948 | <b>2.17</b> |              |             |  |
| <i>kst</i>         | FBgn0004167 | <b>2.19</b> |              |             |  |
| <i>Acp1</i>        | FBgn0014454 | <b>2.25</b> |              |             |  |
| <i>Cht7</i>        | FBgn0035398 | <b>2.27</b> | <b>0.194</b> |             |  |
| <i>verm</i>        | FBgn0261341 | <b>2.28</b> |              |             |  |
| <i>Cpr11B</i>      | FBgn0030398 | <b>2.30</b> |              |             |  |
| <i>Cda5</i>        | FBgn0051973 | <b>2.33</b> | <b>0.109</b> |             |  |
| <i>obst-I</i>      | FBgn0052304 | <b>2.33</b> |              |             |  |
| <i>Cht6</i>        | FBgn0263132 | <b>2.38</b> |              |             |  |
| <i>CG4367</i>      | FBgn0038783 | <b>2.39</b> |              |             |  |
| <i>obst-H</i>      | FBgn0053983 | <b>2.39</b> | <b>11.78</b> |             |  |
| <i>Cpr67Fa1</i>    | FBgn0036108 | <b>2.41</b> |              |             |  |
| <i>Gasp</i>        | FBgn0026077 | <b>2.43</b> |              |             |  |
| <i>Cpr67Fa2</i>    | FBgn0036109 | <b>2.45</b> |              |             |  |
| <i>CG7252</i>      | FBgn0036226 | <b>2.46</b> |              |             |  |
| <i>CG33468</i>     | FBgn0053468 | <b>2.46</b> | <b>4.91</b>  | <b>2.57</b> |  |
| <i>nrm</i>         | FBgn0262509 | <b>2.48</b> |              |             |  |
| <i>Lcp65Ag3</i>    | FBgn0086611 | <b>2.50</b> |              |             |  |
| <i>Lcp65Ag2</i>    | FBgn0020637 | <b>2.51</b> |              |             |  |
| <i>Muc11A</i>      | FBgn0052656 | <b>2.68</b> |              |             |  |
| <i>CG32284</i>     | FBgn0052284 | <b>2.69</b> |              |             |  |
| <i>obst-F</i>      | FBgn0036947 | <b>2.77</b> |              |             |  |
| <i>Mur18B</i>      | FBgn0030999 | <b>2.79</b> |              |             |  |
| <i>CG43896</i>     | FBgn0264488 | <b>2.85</b> |              |             |  |
| <i>CG43896</i>     | FBgn0264488 | <b>2.91</b> |              |             |  |
| <i>Cpr62Bc</i>     | FBgn0035281 | <b>2.95</b> |              |             |  |
| <i>CG5883</i>      | FBgn0036225 | <b>2.95</b> |              |             |  |
| <i>PH4alphaSG1</i> | FBgn0051014 | <b>3.07</b> |              |             |  |
| <i>Muc96D</i>      | FBgn0051439 | <b>3.18</b> |              |             |  |
| <i>PH4alphaPV</i>  | FBgn0051015 | <b>3.27</b> |              |             |  |
| <i>Tg</i>          | FBgn0031975 | <b>3.41</b> | <b>0.241</b> |             |  |
| <i>Muc18B</i>      | FBgn0031000 | <b>3.63</b> | <b>2.48</b>  |             |  |
| <i>Cpr49Ah</i>     | FBgn0033731 | <b>3.86</b> |              |             |  |
| <i>Cpr11A</i>      | FBgn0030394 | <b>3.97</b> |              |             |  |
| <i>obst-E</i>      | FBgn0031737 | <b>3.97</b> |              |             |  |
| <i>CG10725</i>     | FBgn0036362 | <b>4.20</b> |              |             |  |
| <i>TwdIO</i>       | FBgn0039438 | <b>4.35</b> |              |             |  |
| <i>Mal-A3</i>      | FBgn0002571 | <b>4.47</b> |              |             |  |
| <i>ng2</i>         | FBgn0010294 | <b>5.17</b> |              |             |  |
| <i>Cpr49Af</i>     | FBgn0033729 | <b>5.21</b> |              |             |  |
| <i>ng1</i>         | FBgn0002933 | <b>5.94</b> |              |             |  |
| <i>CG10154</i>     | FBgn0036361 | <b>6.68</b> |              |             |  |
| <i>Muc55B</i>      | FBgn0034294 | <b>6.96</b> |              |             |  |
| <i>CG15515</i>     | FBgn0039719 | <b>7.16</b> |              |             |  |
| <i>CG4835</i>      | FBgn0035607 | <b>10.1</b> |              |             |  |
| <i>Cpr47Eb</i>     | FBgn0033598 | <b>14.1</b> | <b>25.21</b> |             |  |
| <i>CG12491</i>     | FBgn0034900 | <b>31.8</b> | <b>6.23</b>  |             |  |
| <b>transport</b>   |             |             |              |             |  |



|                 |             |             |              |             |              |
|-----------------|-------------|-------------|--------------|-------------|--------------|
| <i>CG16989</i>  | FBgn0025621 | <b>2.03</b> |              |             |              |
| <i>Oatp74D</i>  | FBgn0036732 | <b>2.04</b> | <b>2.37</b>  |             |              |
| <i>Prestin</i>  | FBgn0036770 | <b>2.06</b> | <b>2.22</b>  |             |              |
| <i>CG7458</i>   | FBgn0037144 | <b>2.06</b> |              |             | <b>0.413</b> |
| <i>CG11147</i>  | FBgn0031734 | <b>2.10</b> |              |             |              |
| <i>CG1718</i>   | FBgn0031170 | <b>2.13</b> | <b>2.30</b>  |             |              |
| <i>CG9702</i>   | FBgn0039787 | <b>2.13</b> |              |             |              |
| <i>CG11897</i>  | FBgn0039644 | <b>2.14</b> | <b>5.52</b>  | <b>2.61</b> | <b>2.59</b>  |
| <i>CG5326</i>   | FBgn0038983 | <b>2.16</b> | <b>2.44</b>  |             |              |
| <i>CG7084</i>   | FBgn0038938 | <b>2.16</b> |              |             |              |
| <i>MRP</i>      | FBgn0032456 | <b>2.16</b> | <b>2.08</b>  |             |              |
| <i>CG6901</i>   | FBgn0038414 | <b>2.17</b> |              |             |              |
| <i>CG8028</i>   | FBgn0031010 | <b>2.17</b> |              |             |              |
| <i>CG9413</i>   | FBgn0030574 | <b>2.20</b> |              |             |              |
| <i>Mdr65</i>    | FBgn0004513 | <b>2.27</b> |              |             |              |
| <i>ppk6</i>     | FBgn0034489 | <b>2.39</b> |              |             |              |
| <i>p24-2</i>    | FBgn0053105 | <b>2.39</b> | <b>0.122</b> |             |              |
| <i>CG31792</i>  | FBgn0051792 | <b>2.43</b> |              |             |              |
| <i>Vha100-4</i> | FBgn0038613 | <b>2.43</b> |              |             |              |
| <i>CG30016</i>  | FBgn0050016 | <b>2.50</b> |              |             |              |
| <i>hoe1</i>     | FBgn0041150 | <b>2.53</b> |              |             |              |
| <i>Tsf1</i>     | FBgn0022355 | <b>2.57</b> | <b>7.68</b>  |             |              |
| <i>CG31743</i>  | FBgn0032618 | <b>2.60</b> |              |             | <b>4.18</b>  |
| <i>path</i>     | FBgn0036007 | <b>2.60</b> |              |             |              |
| <i>AQP</i>      | FBgn0033807 | <b>2.64</b> |              |             |              |
| <i>Smt</i>      | FBgn0039873 | <b>2.68</b> |              |             |              |
| <i>Tsf1</i>     | FBgn0022355 | <b>2.69</b> | <b>7.68</b>  |             |              |
| <i>CG10505</i>  | FBgn0034612 | <b>2.71</b> |              |             |              |
| <i>Oatp58Dc</i> | FBgn0034716 | <b>2.73</b> |              |             |              |
| <i>CG9981</i>   | FBgn0030746 | <b>2.77</b> |              | <b>9.00</b> |              |
| <i>Calx</i>     | FBgn0013995 | <b>2.81</b> |              |             |              |
| <i>CG13124</i>  | FBgn0032156 | <b>2.91</b> |              |             |              |
| <i>Rab9</i>     | FBgn0032782 | <b>2.93</b> | <b>2.56</b>  |             |              |
| <i>CG17636</i>  | FBgn0025837 | <b>2.97</b> |              |             |              |
| <i>CG33281</i>  | FBgn0053281 | <b>3.01</b> |              |             |              |
| <i>Rh50</i>     | FBgn0028699 | <b>3.01</b> |              |             |              |
| <i>CG30272</i>  | FBgn0050272 | <b>3.05</b> |              |             |              |
| <i>Oatp33Eb</i> | FBgn0032435 | <b>3.14</b> |              |             |              |
| <i>CG7912</i>   | FBgn0039736 | <b>3.16</b> |              |             |              |
| <i>CG8791</i>   | FBgn0033234 | <b>3.20</b> | <b>13.03</b> |             |              |
| <i>salt</i>     | FBgn0039872 | <b>3.27</b> |              |             |              |
| <i>CG8051</i>   | FBgn0031012 | <b>4.03</b> |              |             |              |
| <i>CG2187</i>   | FBgn0017448 | <b>4.06</b> | <b>3.10</b>  |             |              |
| <i>st</i>       | FBgn0003515 | <b>4.06</b> |              |             |              |
| <i>CG4830</i>   | FBgn0037996 | <b>4.35</b> |              |             |              |
| <i>CG6293</i>   | FBgn0037807 | <b>4.99</b> | <b>3.59</b>  |             |              |
| <i>CG9780</i>   | FBgn0037230 | <b>5.13</b> | <b>17.37</b> |             |              |
| <i>CG18327</i>  | FBgn0033904 | <b>5.66</b> |              |             |              |
| <i>Nha2</i>     | FBgn0263390 | <b>6.11</b> |              | <b>2.32</b> |              |
| <i>CG4991</i>   | FBgn0030817 | <b>6.82</b> | <b>3.76</b>  |             |              |
| <i>CG9825</i>   | FBgn0034783 | <b>6.96</b> |              |             |              |
| <i>CG8654</i>   | FBgn0034479 | <b>9.85</b> |              |             |              |

| <b>unknown function</b> |             |             |              |             |             |
|-------------------------|-------------|-------------|--------------|-------------|-------------|
| <i>CG9682</i>           | FBgn0039760 | <b>2.00</b> |              |             |             |
| <i>CG11158</i>          | FBgn0030511 | <b>2.01</b> | <b>2.73</b>  |             |             |
| <i>llp8</i>             | FBgn0036690 | <b>2.01</b> |              |             |             |
| <i>CG17147</i>          | FBgn0260393 | <b>2.01</b> |              |             |             |
| <i>CG7992</i>           | FBgn0031004 | <b>2.03</b> |              |             |             |
| <i>CG15597</i>          | FBgn0037420 | <b>2.03</b> |              |             |             |
| <i>CG13360</i>          | FBgn0025620 | <b>2.04</b> |              |             |             |
| <i>CG15236</i>          | FBgn0033108 | <b>2.04</b> |              |             |             |
| <i>Piezo</i>            | FBgn0264953 | <b>2.04</b> |              |             |             |
| <i>Rcd2</i>             | FBgn0037012 | <b>2.04</b> | <b>6.47</b>  |             |             |
| <i>CG32485</i>          | FBgn0052485 | <b>2.04</b> |              |             |             |
| <i>CG11168</i>          | FBgn0039249 | <b>2.06</b> |              |             |             |
| <i>jp</i>               | FBgn0032129 | <b>2.06</b> | <b>0.303</b> |             |             |
| <i>CG15523</i>          | FBgn0039727 | <b>2.06</b> | <b>0.328</b> |             |             |
| <i>CG5399</i>           | FBgn0038353 | <b>2.06</b> | <b>28.01</b> | <b>2.91</b> |             |
| <i>CG5819</i>           | FBgn0034717 | <b>2.07</b> |              |             |             |
| <i>CG15043</i>          | FBgn0030929 | <b>2.07</b> |              |             |             |
| <i>CG8177</i>           | FBgn0036043 | <b>2.08</b> | <b>0.177</b> |             |             |
| <i>CG8087</i>           | FBgn0038241 | <b>2.08</b> | <b>0.445</b> |             |             |
| <i>CG31321</i>          | FBgn0051321 | <b>2.10</b> |              |             |             |
| <i>CG12075</i>          | FBgn0030065 | <b>2.10</b> |              |             |             |
| <i>CG7920</i>           | FBgn0039737 | <b>2.10</b> |              |             |             |
| <i>CG14907</i>          | FBgn0038455 | <b>2.10</b> | <b>6.93</b>  |             |             |
| <i>Tyler</i>            | FBgn0031038 | <b>2.10</b> | <b>2.09</b>  |             |             |
| <i>CG12826</i>          | FBgn0033207 | <b>2.10</b> | <b>6.33</b>  |             |             |
| <i>CG5506</i>           | FBgn0036766 | <b>2.10</b> |              |             |             |
| <i>LP09564</i>          | FBcl0187291 | <b>2.10</b> |              |             |             |
| <i>Pebp1</i>            | FBgn0038973 | <b>2.11</b> |              |             |             |
| <i>CG32714</i>          | FBgn0260483 | <b>2.13</b> |              |             |             |
| <i>CG10936</i>          | FBgn0034253 | <b>2.14</b> | <b>9.27</b>  |             |             |
| <i>CG13806</i>          | FBgn0035325 | <b>2.14</b> |              |             |             |
| <i>Rootletin</i>        | FBgn0039152 | <b>2.16</b> |              |             |             |
| <i>CG5084</i>           | FBgn0034288 | <b>2.16</b> |              |             |             |
| <i>GM03661</i>          | FBcl0137693 | <b>2.16</b> |              |             |             |
| <i>CG14456</i>          | FBgn0037176 | <b>2.17</b> |              |             |             |
| <i>atilla</i>           | FBgn0032422 | <b>2.17</b> |              |             |             |
| <i>CG2010</i>           | FBgn0039667 | <b>2.20</b> |              |             |             |
| <i>Pdxk</i>             | FBgn0085484 | <b>2.22</b> |              |             |             |
| <i>CG5767</i>           | FBgn0034292 | <b>2.22</b> |              |             |             |
| <i>CG8852</i>           | FBgn0031548 | <b>2.23</b> |              |             |             |
| <i>CG31974</i>          | FBgn0051974 | <b>2.23</b> | <b>4.74</b>  |             | <b>2.12</b> |
| <i>CG40198</i>          | FBgn0058198 | <b>2.23</b> |              |             |             |
| <i>CG12177</i>          | FBgn0030510 | <b>2.25</b> | <b>6.26</b>  |             |             |
| <i>CG43693</i>          | FBgn0263776 | <b>2.27</b> |              |             |             |
| <i>CG13912</i>          | FBgn0035186 | <b>2.27</b> |              | <b>2.23</b> |             |
| <i>CG13003</i>          | FBgn0030798 | <b>2.28</b> |              |             |             |
| <i>Ect4</i>             | FBgn0262579 | <b>2.28</b> |              | <b>2.17</b> |             |
| <i>CG11313</i>          | FBgn0039798 | <b>2.30</b> | <b>5.46</b>  |             |             |
| <i>CG14273</i>          | FBgn0032024 | <b>2.30</b> |              |             |             |
| <i>CG32603</i>          | FBgn0052603 | <b>2.30</b> |              |             |             |
| <i>CG5866</i>           | FBgn0038508 | <b>2.31</b> |              |             |             |

|                  |             |      |       |       |
|------------------|-------------|------|-------|-------|
| <i>TwdlBeta</i>  | FBgn0033658 | 2.31 |       |       |
| <i>CG31769</i>   | FBgn0051769 | 2.33 | 2.49  | 0.380 |
| <i>CG4733</i>    | FBgn0038744 | 2.33 |       |       |
| <i>CG34120</i>   | FBgn0083956 | 2.35 |       |       |
| <i>CG6023</i>    | FBgn0030912 | 2.35 | 2.88  |       |
| <i>CG43078</i>   | FBgn0262508 | 2.35 |       |       |
| <i>CG2157</i>    | FBgn0030244 | 2.35 |       |       |
| <i>CG9399</i>    | FBgn0037715 | 2.36 | 2.74  |       |
| <i>CG30411</i>   | FBgn0050411 | 2.36 | 0.040 |       |
| <i>CG9568</i>    | FBgn0032087 | 2.38 |       |       |
| <i>CG31446</i>   | FBgn0051446 | 2.38 |       |       |
| <i>CG18635</i>   | FBgn0034279 | 2.38 |       |       |
| <i>Gllspla2</i>  | FBgn0030013 | 2.39 |       |       |
| <i>CG1698</i>    | FBgn0033443 | 2.39 |       |       |
| <i>CG42249</i>   | FBgn0259101 | 2.41 |       |       |
| <i>CG15199</i>   | FBgn0030270 | 2.41 | 3.28  |       |
| <i>CG31086</i>   | FBgn0051086 | 2.41 |       |       |
| <i>CG9626</i>    | FBgn0037565 | 2.46 |       |       |
| <i>CG31259</i>   | FBgn0051259 | 2.48 |       |       |
| <i>CG17108</i>   | FBgn0032285 | 2.48 |       |       |
| <i>CG14893</i>   | FBgn0038451 | 2.50 |       |       |
| <i>CG5535</i>    | FBgn0036764 | 2.51 | 7.41  |       |
| <i>CG31269</i>   | FBgn0051269 | 2.57 |       |       |
| <i>CG33469</i>   | FBgn0053469 | 2.58 |       |       |
| <i>CG13323</i>   | FBgn0033788 | 2.58 |       |       |
| <i>CG16820</i>   | FBgn0032495 | 2.60 |       |       |
| <i>CR14033</i>   | FBgn0046776 | 2.60 | 41.33 |       |
| <i>CG31464</i>   | FBgn0051464 | 2.64 |       |       |
| <i>HDC07637</i>  |             | 2.64 |       |       |
| <i>ppk13</i>     | FBgn0053508 | 2.66 |       |       |
| <i>SP1173</i>    | FBgn0035710 | 2.71 |       |       |
| <i>ps</i>        | FBgn0261552 | 2.71 |       |       |
| <i>CG7900</i>    | FBgn0037548 | 2.71 | 2.96  | 0.476 |
| <i>Lmpt</i>      | FBgn0261565 | 2.73 |       |       |
| <i>CG31288</i>   | FBgn0051288 | 2.75 | 28.68 |       |
| <i>CG17167</i>   | FBgn0039941 | 2.75 |       |       |
| <i>CG12105</i>   | FBgn0035241 | 2.75 |       |       |
| <i>Skeletor</i>  | FBgn0262717 | 2.75 |       |       |
| <i>CG44250</i>   | FBgn0265185 | 2.75 |       |       |
| <i>CG13492</i>   | FBgn0034662 | 2.77 |       |       |
| <i>I(1)G0196</i> | FBgn0027279 | 2.79 |       |       |
| <i>HDC03517</i>  |             | 2.79 |       |       |
| <i>CG43897</i>   | FBgn0264489 | 2.79 |       |       |
| <i>CT22789</i>   |             | 2.81 |       |       |
| <i>mtg</i>       | FBgn0260386 | 2.83 |       | 2.11  |
| <i>CR31781</i>   | FBgn0051781 | 2.85 | 0.354 |       |
| <i>CG15412</i>   | FBgn0031528 | 2.85 |       |       |
| <i>CG11160</i>   | FBgn0030257 | 2.87 |       |       |
| <i>CG10597</i>   | FBgn0030832 | 2.87 |       |       |
| <i>CG15741</i>   | FBgn0030338 | 2.91 | 76.88 |       |
| <i>CG10732</i>   | FBgn0036365 | 2.93 |       |       |
| <i>CG7631</i>    | FBgn0028945 | 2.99 |       |       |

|                          |             |              |              |             |              |
|--------------------------|-------------|--------------|--------------|-------------|--------------|
| <i>CG32198</i>           | FBgn0052198 | <b>3.12</b>  |              |             |              |
| <i>CG15213</i>           | FBgn0040843 | <b>3.12</b>  |              |             |              |
| <i>CG7300</i>            | FBgn0032286 | <b>3.16</b>  |              |             |              |
| <i>CG43427</i>           | FBgn0263346 | <b>3.20</b>  |              |             |              |
| <i>CG14852</i>           | FBgn0038242 | <b>3.20</b>  | <b>0.084</b> |             |              |
| <i>CG34278</i>           | FBgn0085307 | <b>3.25</b>  | <b>4.76</b>  |             |              |
| <i>CG13102</i>           | FBgn0032088 | <b>3.32</b>  |              |             |              |
| <i>Cpr47Ec</i>           | FBgn0033600 | <b>3.32</b>  |              |             |              |
| <i>Obp83g</i>            | FBgn0046875 | <b>3.32</b>  |              |             |              |
| <i>CR31781</i>           | FBgn0051781 | <b>3.34</b>  | <b>0.354</b> |             |              |
| <i>GM10545</i>           | FBcl0137569 | <b>3.34</b>  |              |             |              |
| HDC03535                 |             | <b>3.36</b>  |              |             |              |
| <i>CG15530</i>           | FBgn0039752 | <b>3.41</b>  |              |             |              |
| <i>CG9396</i>            | FBgn0037714 | <b>3.53</b>  | <b>5.56</b>  |             |              |
| CT37020                  |             | <b>3.56</b>  |              |             |              |
| <i>GstD7</i>             | FBgn0010043 | <b>3.61</b>  | <b>3.98</b>  |             | <b>12.65</b> |
| <i>CG13705</i>           | FBgn0035582 | <b>3.78</b>  |              |             |              |
| <i>CG13946</i>           | FBgn0040725 | <b>3.92</b>  | <b>30.28</b> |             |              |
| <i>CG4962</i>            | FBgn0036597 | <b>4.03</b>  |              |             |              |
| <i>CG14292</i>           | FBgn0038658 | <b>4.11</b>  |              |             |              |
| <i>CG42565</i>           | FBgn0260767 | <b>4.47</b>  |              |             |              |
| <i>CG32241</i>           | FBgn0052241 | <b>4.72</b>  |              |             |              |
| <i>CG5810</i>            | FBgn0038866 | <b>4.79</b>  |              |             |              |
| <i>CG13460</i>           | FBgn0036471 | <b>4.79</b>  |              |             |              |
| <i>CG18649</i>           | FBgn0036469 | <b>5.06</b>  |              |             |              |
| <i>CG11350</i>           | FBgn0035552 | <b>5.28</b>  |              |             |              |
| <i>CG8773</i>            | FBgn0038135 | <b>5.35</b>  |              |             |              |
| <i>CG43078</i>           | FBgn0262508 | <b>5.58</b>  |              |             |              |
| <i>CG2064</i>            | FBgn0033205 | <b>5.86</b>  | <b>2.24</b>  |             |              |
| <i>CG14120</i>           | FBgn0036321 | <b>6.02</b>  |              |             |              |
| <i>CG14879</i>           | FBgn0038419 | <b>6.15</b>  |              |             |              |
| <i>CG32073</i>           | FBgn0052073 | <b>6.19</b>  | <b>19.44</b> |             |              |
| <i>CG10953</i>           | FBgn0034204 | <b>6.23</b>  |              |             |              |
| <i>CG9555</i>            | FBgn0032085 | <b>8.00</b>  |              |             |              |
| <i>Cyp4p3</i>            | FBgn0033397 | <b>8.75</b>  | <b>9.73</b>  | <b>2.75</b> |              |
| <i>CG12506</i>           | FBgn0031276 | <b>9.92</b>  | <b>18.91</b> |             |              |
| <i>CG32564</i>           | FBgn0052564 | <b>14.93</b> | <b>3.08</b>  |             |              |
| <i>CG8534</i>            | FBgn0037761 | <b>3.10</b>  |              |             |              |
| <i>CG13640</i>           | FBgn0039237 | <b>6.23</b>  |              |             |              |
| <b>Chd1 effect: DOWN</b> |             |              |              |             |              |
| <b>detoxification</b>    |             |              |              |             |              |
| <i>Cyp312a1</i>          | FBgn0036778 | <b>0.497</b> |              |             |              |
| <i>Cyp6d5</i>            | FBgn0038194 | <b>0.490</b> |              | <b>3.00</b> | <b>13.46</b> |
| <i>Cyp309a1</i>          | FBgn0031432 | <b>0.444</b> | <b>2.62</b>  |             |              |
| <i>GstE3</i>             | FBgn0063497 | <b>0.432</b> |              | <b>5.89</b> |              |
| <i>GstD10</i>            | FBgn0042206 | <b>0.409</b> |              |             |              |
| <i>Hsp22</i>             | FBgn0001223 | <b>0.342</b> | <b>2.94</b>  |             |              |
| <i>GstT3</i>             | FBgn0031117 | <b>0.337</b> | <b>2.41</b>  |             |              |
| <i>CG6762</i>            | FBgn0030876 | <b>0.316</b> |              |             |              |
| <i>Hsp26</i>             | FBgn0001225 | <b>0.304</b> |              |             |              |
| <i>GstE1</i>             | FBgn0034335 | <b>0.304</b> | <b>2.21</b>  |             |              |
| <i>MtnD</i>              | FBgn0053192 | <b>0.287</b> | <b>12.01</b> |             |              |

|                         |             |              |              |              |             |
|-------------------------|-------------|--------------|--------------|--------------|-------------|
| <i>CG17323</i>          | FBgn0032713 | <b>0.272</b> |              |              |             |
| <i>MtnC</i>             | FBgn0038790 | <b>0.248</b> |              |              |             |
| <i>GstD2</i>            | FBgn0010038 | <b>0.235</b> | <b>9.61</b>  | <b>2.74</b>  |             |
| <i>GstD4</i>            | FBgn0010040 | <b>0.216</b> |              |              |             |
| <i>Hsp67Bc</i>          | FBgn0001229 | <b>0.200</b> | <b>2.74</b>  | <b>2.38</b>  |             |
| <i>NLaz</i>             | FBgn0053126 | <b>0.171</b> |              |              |             |
| <i>CG7227</i>           | FBgn0031970 | <b>0.143</b> | <b>0.310</b> |              |             |
| <i>MtnB</i>             | FBgn0002869 | <b>0.092</b> |              |              |             |
| <b>development</b>      |             |              |              |              |             |
| <i>yellow-d2</i>        | FBgn0034856 | <b>0.497</b> |              |              |             |
| <i>sad</i>              | FBgn0003312 | <b>0.493</b> |              |              |             |
| <i>rdo</i>              | FBgn0243486 | <b>0.473</b> | <b>0.207</b> |              |             |
| <i>ImpE1</i>            | FBgn0001253 | <b>0.435</b> |              |              |             |
| <i>in</i>               | FBgn0001259 | <b>0.432</b> |              |              |             |
| <i>neo</i>              | FBgn0039704 | <b>0.409</b> |              |              |             |
| <i>CG15153</i>          | FBgn0032663 | <b>0.361</b> |              |              |             |
| <i>CG18607</i>          | FBgn0034429 | <b>0.344</b> |              |              |             |
| <i>nvd</i>              | FBgn0259697 | <b>0.312</b> |              |              |             |
| <i>CG9005</i>           | FBgn0033638 | <b>0.272</b> | <b>0.260</b> |              |             |
| <i>ImpE1</i>            | FBgn0001253 | <b>0.264</b> |              |              |             |
| <i>CG2016</i>           | FBgn0250839 | <b>0.188</b> |              |              |             |
| <i>Eig71Ed</i>          | FBgn0004591 | <b>0.184</b> | <b>0.127</b> |              |             |
| <i>Yp3</i>              | FBgn0004047 | <b>0.180</b> |              | <b>16.14</b> |             |
| <i>Eip74EF</i>          | FBgn0000567 | <b>0.176</b> | <b>0.341</b> |              |             |
| <i>ImpE3</i>            | FBgn0001255 | <b>0.171</b> |              |              | <b>2.10</b> |
| <i>Eip78C</i>           | FBgn0004865 | <b>0.144</b> | <b>0.136</b> | <b>2.12</b>  |             |
| <i>ImpE2</i>            | FBgn0001254 | <b>0.132</b> |              |              |             |
| <i>Eig71Ea</i>          | FBgn0004588 | <b>0.126</b> | <b>0.037</b> |              |             |
| <i>Eig71Ec</i>          | FBgn0004590 | <b>0.115</b> |              |              |             |
| <i>slbo</i>             | FBgn0005638 | <b>0.115</b> | <b>5.57</b>  |              |             |
| <i>Eig71Eg</i>          | FBgn0004594 | <b>0.103</b> | <b>0.027</b> |              |             |
| <i>Eig71Eb</i>          | FBgn0004589 | <b>0.023</b> | <b>0.403</b> |              |             |
| <b>immune response</b>  |             |              |              |              |             |
| <i>sn</i>               | FBgn0003447 | <b>0.476</b> |              |              |             |
| <i>Hsp27</i>            | FBgn0001226 | <b>0.457</b> |              |              | <b>2.41</b> |
| <i>Drs</i>              | FBgn0010381 | <b>0.451</b> | <b>4.28</b>  | <b>2.53</b>  | <b>3.78</b> |
| <i>Mtk</i>              | FBgn0014865 | <b>0.438</b> |              | <b>4.93</b>  | <b>6.09</b> |
| <i>CG8157</i>           | FBgn0034010 | <b>0.374</b> | <b>3.95</b>  |              |             |
| <i>CG4091</i>           | FBgn0034894 | <b>0.354</b> |              |              |             |
| <i>LysX</i>             | FBgn0004431 | <b>0.344</b> | <b>33.21</b> | <b>2.92</b>  |             |
| <i>AttA</i>             | FBgn0012042 | <b>0.337</b> |              | <b>7.68</b>  |             |
| <i>E(spl)malpha-BFM</i> | FBgn0002732 | <b>0.334</b> | <b>3.57</b>  |              |             |
| <i>spz3</i>             | FBgn0031959 | <b>0.332</b> |              |              |             |
| <i>Tsp42Ep</i>          | FBgn0033137 | <b>0.332</b> | <b>0.395</b> |              |             |
| <i>Atg7</i>             | FBgn0034366 | <b>0.306</b> |              |              |             |
| <i>dsb</i>              | FBgn0035290 | <b>0.301</b> | <b>0.423</b> |              |             |
| <i>E(spl)m2-BFM</i>     | FBgn0002592 | <b>0.291</b> |              |              |             |
| <i>CG9616</i>           | FBgn0038214 | <b>0.289</b> |              |              |             |
| <i>NimC2</i>            | FBgn0028939 | <b>0.287</b> | <b>0.140</b> |              |             |
| <i>spirit</i>           | FBgn0030051 | <b>0.266</b> |              |              |             |
| <i>Mmp1</i>             | FBgn0035049 | <b>0.264</b> | <b>15.55</b> | <b>2.88</b>  | <b>3.34</b> |
| <i>wbl</i>              | FBgn0004003 | <b>0.261</b> | <b>0.495</b> |              |             |

|                                |             |              |               |              |             |
|--------------------------------|-------------|--------------|---------------|--------------|-------------|
| <i>Npc2e</i>                   | FBgn0051410 | <b>0.233</b> | <b>0.028</b>  |              |             |
| <i>PGRP-SC2</i>                | FBgn0043575 | <b>0.222</b> | <b>2.66</b>   | <b>2.37</b>  |             |
| <i>santa-maria</i>             | FBgn0025697 | <b>0.218</b> | <b>0.036</b>  |              |             |
| <i>IM2</i>                     | FBgn0025583 | <b>0.218</b> |               |              |             |
| <i>CG11425</i>                 | FBgn0037167 | <b>0.183</b> |               |              |             |
| <i>CG2065</i>                  | FBgn0033204 | <b>0.163</b> | <b>9.00</b>   | <b>2.72</b>  |             |
| <i>CG3397</i>                  | FBgn0037975 | <b>0.162</b> |               | <b>3.78</b>  |             |
| <i>Spn43Aa</i>                 | FBgn0024294 | <b>0.160</b> | <b>0.336</b>  |              |             |
| <i>CG6429</i>                  | FBgn0046999 | <b>0.147</b> |               |              |             |
| <i>IM3</i>                     | FBgn0040736 | <b>0.139</b> | <b>11.65</b>  |              |             |
| <i>PGRP-SB1</i>                | FBgn0043578 | <b>0.108</b> |               | <b>3.12</b>  |             |
| <i>IM1</i>                     | FBgn0034329 | <b>0.104</b> | <b>33.02</b>  |              |             |
| <i>Drsl5</i>                   | FBgn0035434 | <b>0.092</b> |               |              |             |
| <i>Spn100A</i>                 | FBgn0039795 | <b>0.067</b> |               |              |             |
| <i>CG13606</i>                 | FBgn0039161 | <b>0.042</b> |               |              |             |
| <i>PGRP-SB2</i>                | FBgn0043577 | <b>0.023</b> | <b>12.29</b>  |              |             |
| <i>Drsl2</i>                   | FBgn0052279 | <b>0.020</b> |               |              |             |
| <b>intracellular processes</b> |             |              |               |              |             |
| <i>CG5745</i>                  | FBgn0038855 | <b>0.497</b> |               |              |             |
| <i>CG17754</i>                 | FBgn0030114 | <b>0.490</b> | <b>2.66</b>   |              | <b>2.07</b> |
| <i>insc</i>                    | FBgn0011674 | <b>0.490</b> |               |              |             |
| <i>CG8420</i>                  | FBgn0037664 | <b>0.490</b> |               |              |             |
| <i>GV1</i>                     | FBgn0027790 | <b>0.486</b> |               |              |             |
| <i>RpL22-like</i>              | FBgn0034837 | <b>0.483</b> |               |              |             |
| <i>RpS19b</i>                  | FBgn0039129 | <b>0.483</b> |               |              |             |
| <i>His2B:CG17949</i>           | FBgn0061209 | <b>0.476</b> |               |              |             |
| <i>CG4496</i>                  | FBgn0031894 | <b>0.476</b> | <b>0.293</b>  |              |             |
| <i>lbm</i>                     | FBgn0016032 | <b>0.476</b> |               |              |             |
| <i>nsr</i>                     | FBgn0034740 | <b>0.476</b> |               |              |             |
| <i>Eip71CD</i>                 | FBgn0000565 | <b>0.473</b> |               |              |             |
| <i>Drep-3</i>                  | FBgn0028407 | <b>0.470</b> |               |              |             |
| <i>CG32971</i>                 | FBgn0052971 | <b>0.470</b> |               |              |             |
| <i>tbrd-1</i>                  | FBgn0039124 | <b>0.470</b> |               |              |             |
| <i>Scr</i>                     | FBgn0003339 | <b>0.467</b> |               |              |             |
| <i>sc</i>                      | FBgn0004170 | <b>0.460</b> |               |              |             |
| <i>MED9</i>                    | FBgn0260401 | <b>0.457</b> |               |              |             |
| <i>CG30431</i>                 | FBgn0050431 | <b>0.457</b> |               |              |             |
| <i>en</i>                      | FBgn0000577 | <b>0.454</b> |               |              |             |
| <i>CG17450</i>                 | FBgn0040028 | <b>0.454</b> |               |              |             |
| <i>CG3726</i>                  | FBgn0029824 | <b>0.448</b> |               |              |             |
| <i>thoc6</i>                   | FBgn0036263 | <b>0.448</b> |               |              |             |
| <i>RpL37b</i>                  | FBgn0034822 | <b>0.444</b> |               |              |             |
| <i>Lmpt</i>                    | FBgn0261565 | <b>0.444</b> |               |              |             |
| <i>CG31642</i>                 | FBgn0051642 | <b>0.435</b> |               | <b>79.80</b> |             |
| <i>Hsp67Ba</i>                 | FBgn0001227 | <b>0.429</b> | <b>3.25</b>   |              |             |
| <i>Dark</i>                    | FBgn0263864 | <b>0.418</b> |               |              | <b>2.02</b> |
| <i>CG31274</i>                 | FBgn0051274 | <b>0.418</b> | <b>0.342</b>  |              | <b>5.24</b> |
| <i>betaNACtes4</i>             | FBgn0030566 | <b>0.415</b> |               |              |             |
| <i>CG6891</i>                  | FBgn0030955 | <b>0.412</b> |               |              |             |
| <i>CG12493</i>                 | FBgn0035571 | <b>0.406</b> | <b>117.75</b> |              |             |
| <i>GV1</i>                     | FBgn0027790 | <b>0.398</b> |               |              |             |
| <i>CG18446</i>                 | FBgn0033458 | <b>0.395</b> | <b>2.05</b>   | <b>2.27</b>  |             |

|                      |             |              |               |             |              |
|----------------------|-------------|--------------|---------------|-------------|--------------|
| <i>CG8335</i>        | FBgn0033069 | <b>0.392</b> |               |             |              |
| <i>His1:CG31617</i>  | FBgn0051617 | <b>0.387</b> |               |             |              |
| <i>Eip93F</i>        | FBgn0264490 | <b>0.384</b> |               |             |              |
| <i>CR11386</i>       | FBgn0260447 | <b>0.382</b> |               |             |              |
| <i>toy</i>           | FBgn0019650 | <b>0.379</b> | <b>24.16</b>  |             |              |
| <i>E(spl)m7-HLH</i>  | FBgn0002633 | <b>0.376</b> |               |             |              |
| <i>CG4080</i>        | FBgn0035983 | <b>0.369</b> | <b>0.405</b>  |             |              |
| <i>Taf12L</i>        | FBgn0031623 | <b>0.369</b> | <b>191.54</b> |             |              |
| <i>betaNACtes3</i>   | FBgn0052601 | <b>0.369</b> |               |             |              |
| <i>CG12477</i>       | FBgn0036809 | <b>0.356</b> |               |             |              |
| <i>CG8679</i>        | FBgn0032934 | <b>0.344</b> |               |             |              |
| <i>E(spl)m8-HLH</i>  | FBgn0000591 | <b>0.337</b> |               |             |              |
| <i>toy</i>           | FBgn0019650 | <b>0.332</b> | <b>24.16</b>  |             |              |
| <i>His2A:CG31618</i> | FBgn0051618 | <b>0.330</b> |               |             |              |
| <i>blanks</i>        | FBgn0035608 | <b>0.321</b> | <b>98.58</b>  |             | <b>0.453</b> |
| <i>CG4021</i>        | FBgn0034659 | <b>0.281</b> |               |             |              |
| <i>CG7804</i>        | FBgn0036496 | <b>0.270</b> |               |             |              |
| <i>CG9989</i>        | FBgn0039593 | <b>0.261</b> |               | <b>8.99</b> |              |
| <i>CG34434</i>       | FBgn0250904 | <b>0.200</b> |               |             |              |
| <i>CG17386</i>       | FBgn0033936 | <b>0.087</b> |               |             |              |
| <i>Chd1</i>          | FBgn0250786 | <b>0.013</b> |               |             |              |
| <b>metabolism</b>    |             |              |               |             |              |
| <i>CAH1</i>          | FBgn0027844 | <b>0.493</b> | <b>2.25</b>   | <b>2.30</b> | <b>2.11</b>  |
| <i>Ho</i>            | FBgn0037933 | <b>0.493</b> |               |             |              |
| <i>CG1637</i>        | FBgn0030245 | <b>0.486</b> |               |             |              |
| <i>CG1941</i>        | FBgn0033214 | <b>0.486</b> |               |             |              |
| <i>CG7742</i>        | FBgn0031690 | <b>0.486</b> |               |             |              |
| <i>CG3376</i>        | FBgn0034997 | <b>0.486</b> | <b>0.330</b>  |             |              |
| <i>CLS</i>           | FBgn0039360 | <b>0.476</b> |               |             |              |
| <i>wat</i>           | FBgn0039620 | <b>0.470</b> |               |             |              |
| <i>CG5554</i>        | FBgn0034914 | <b>0.463</b> | <b>0.379</b>  |             |              |
| <i>Sep5</i>          | FBgn0026361 | <b>0.454</b> | <b>2.36</b>   |             |              |
| <i>Scp2</i>          | FBgn0020907 | <b>0.451</b> |               |             |              |
| <i>Dyrk2</i>         | FBgn0016930 | <b>0.448</b> |               | <b>2.13</b> |              |
| <i>ade3</i>          | FBgn0000053 | <b>0.444</b> | <b>0.423</b>  |             |              |
| <i>CG5854</i>        | FBgn0039130 | <b>0.441</b> | <b>0.477</b>  |             |              |
| <i>CG1942</i>        | FBgn0033215 | <b>0.426</b> |               |             |              |
| <i>Oscillin</i>      | FBgn0031717 | <b>0.426</b> | <b>0.302</b>  |             |              |
| <i>CG15343</i>       | FBgn0030029 | <b>0.423</b> | <b>0.124</b>  |             | <b>3.07</b>  |
| <i>CG18528</i>       | FBgn0039189 | <b>0.423</b> |               |             |              |
| <i>CG4546</i>        | FBgn0038373 | <b>0.418</b> |               |             |              |
| <i>CG9509</i>        | FBgn0030594 | <b>0.415</b> | <b>0.147</b>  |             |              |
| <i>CG8565</i>        | FBgn0030697 | <b>0.406</b> |               |             |              |
| <i>CG13833</i>       | FBgn0039040 | <b>0.398</b> |               |             |              |
| <i>CG8112</i>        | FBgn0037612 | <b>0.395</b> | <b>0.205</b>  |             |              |
| <i>CG3264</i>        | FBgn0034712 | <b>0.392</b> |               |             |              |
| <i>Dhpr</i>          | FBgn0035964 | <b>0.387</b> |               |             |              |
| <i>CG6287</i>        | FBgn0032350 | <b>0.382</b> |               | <b>2.03</b> |              |
| <i>CG11170</i>       | FBgn0034705 | <b>0.379</b> | <b>0.365</b>  |             |              |
| <i>slow</i>          | FBgn0035539 | <b>0.376</b> | <b>2.34</b>   |             |              |
| <i>CG4586</i>        | FBgn0029924 | <b>0.376</b> | <b>0.432</b>  |             |              |
| <i>CG17191</i>       | FBgn0039473 | <b>0.376</b> |               |             |              |

|                    |             |              |              |              |              |
|--------------------|-------------|--------------|--------------|--------------|--------------|
| <i>CG12539</i>     | FBgn0030586 | <b>0.374</b> |              |              |              |
| <i>MESR6</i>       | FBgn0036846 | <b>0.361</b> | <b>0.364</b> |              |              |
| <i>CG33096</i>     | FBgn0053096 | <b>0.361</b> |              |              |              |
| <i>yellow-f</i>    | FBgn0041710 | <b>0.358</b> | <b>0.330</b> | <b>2.09</b>  |              |
| <i>Pu</i>          | FBgn0003162 | <b>0.356</b> |              |              |              |
| <i>CG3940</i>      | FBgn0037788 | <b>0.356</b> |              | <b>8.33</b>  |              |
| <i>CG7320</i>      | FBgn0036782 | <b>0.349</b> |              |              |              |
| <i>Est-P</i>       | FBgn0000594 | <b>0.342</b> |              |              |              |
| <i>CG8100</i>      | FBgn0036410 | <b>0.339</b> |              |              |              |
| <i>Ady43A</i>      | FBgn0026602 | <b>0.339</b> |              |              |              |
| <i>Nmdmc</i>       | FBgn0010222 | <b>0.330</b> |              |              |              |
| <i>CG14946</i>     | FBgn0032405 | <b>0.310</b> |              |              |              |
| <i>Asph</i>        | FBgn0034075 | <b>0.308</b> | <b>0.427</b> |              | <b>2.25</b>  |
| <i>Oat</i>         | FBgn0022774 | <b>0.306</b> | <b>0.077</b> |              | <b>3.00</b>  |
| <i>AANATL2</i>     | FBgn0031791 | <b>0.295</b> | <b>0.305</b> |              |              |
| <i>CG4842</i>      | FBgn0036620 | <b>0.289</b> |              |              |              |
| <i>spok</i>        | FBgn0086917 | <b>0.289</b> |              |              |              |
| <i>Ddc</i>         | FBgn0000422 | <b>0.259</b> |              |              |              |
| <i>CG5618</i>      | FBgn0036975 | <b>0.252</b> |              |              |              |
| <i>Acp63F</i>      | FBgn0015585 | <b>0.237</b> |              |              |              |
| <i>CG10178</i>     | FBgn0032684 | <b>0.178</b> |              |              |              |
| <i>CG5171</i>      | FBgn0031907 | <b>0.149</b> |              | <b>20.62</b> |              |
| <i>yellow-c</i>    | FBgn0041713 | <b>0.146</b> |              |              | <b>4.92</b>  |
| <i>CG4382</i>      | FBgn0032132 | <b>0.131</b> |              |              |              |
| <i>CG8093</i>      | FBgn0033999 | <b>0.113</b> |              |              |              |
| <i>CG6277</i>      | FBgn0039475 | <b>0.107</b> |              |              |              |
| <i>w</i>           | FBgn0003996 | <b>0.079</b> | <b>4.39</b>  |              |              |
| <i>CG9452</i>      | FBgn0036877 | <b>0.073</b> |              |              |              |
| <i>CG18606</i>     | FBgn0034428 | <b>0.069</b> |              |              |              |
| <i>CG14406</i>     | FBgn0030595 | <b>0.061</b> | <b>0.314</b> |              |              |
| <i>CG2070</i>      | FBgn0033203 | <b>0.047</b> |              |              |              |
| <i>St2</i>         | FBgn0037665 | <b>0.045</b> |              |              |              |
| <i>e</i>           | FBgn0000527 | <b>0.042</b> | <b>2.93</b>  |              | <b>5.46</b>  |
| <b>proteolysis</b> |             |              |              |              |              |
| <i>hh</i>          | FBgn0004644 | <b>0.497</b> |              |              |              |
| <i>CG31778</i>     | FBgn0051778 | <b>0.483</b> |              |              |              |
| <i>S-Lap3</i>      | FBgn0045770 | <b>0.457</b> |              |              |              |
| <i>Rpt6R</i>       | FBgn0039788 | <b>0.451</b> | <b>36.11</b> |              |              |
| <i>Spn88Eb</i>     | FBgn0038299 | <b>0.451</b> | <b>6.72</b>  |              |              |
| <i>S-Lap2</i>      | FBgn0052351 | <b>0.451</b> |              |              |              |
| <i>CG8586</i>      | FBgn0033320 | <b>0.438</b> |              | <b>6.89</b>  |              |
| <i>Sb</i>          | FBgn0003319 | <b>0.432</b> |              |              |              |
| <i>Spn42Dd</i>     | FBgn0028988 | <b>0.426</b> | <b>0.341</b> |              |              |
| <i>CG11023</i>     | FBgn0031208 | <b>0.420</b> |              |              |              |
| <i>Sp7</i>         | FBgn0037515 | <b>0.401</b> |              |              | <b>0.466</b> |
| <i>CG10764</i>     | FBgn0034221 | <b>0.390</b> |              |              | <b>2.61</b>  |
| <i>Jon99Ci</i>     | FBgn0003358 | <b>0.376</b> | <b>2.55</b>  |              |              |
| <i>CG4408</i>      | FBgn0039073 | <b>0.374</b> | <b>0.260</b> |              |              |
| <i>CG8550</i>      | FBgn0033742 | <b>0.361</b> |              |              |              |
| <i>CG30289</i>     | FBgn0050289 | <b>0.354</b> | <b>0.151</b> |              |              |
| <i>CG9850</i>      | FBgn0034903 | <b>0.334</b> |              |              |              |
| <i>CG31777</i>     | FBgn0051777 | <b>0.323</b> | <b>2.75</b>  |              |              |



|                         |             |              |              |             |              |
|-------------------------|-------------|--------------|--------------|-------------|--------------|
| <i>CG4914</i>           | FBgn0036436 | <b>0.323</b> |              |             |              |
| <i>CG30288</i>          | FBgn0050288 | <b>0.312</b> | <b>0.407</b> |             |              |
| <i>CG9850</i>           | FBgn0034903 | <b>0.304</b> |              |             |              |
| <i>Nep2</i>             | FBgn0027570 | <b>0.283</b> |              | <b>4.58</b> |              |
| <i>NnaD</i>             | FBgn0265726 | <b>0.266</b> |              |             |              |
| <i>CG11529</i>          | FBgn0036264 | <b>0.255</b> |              |             |              |
| <i>CG3355</i>           | FBgn0031619 | <b>0.252</b> |              |             |              |
| <i>CG30098</i>          | FBgn0050098 | <b>0.250</b> |              |             |              |
| <i>SP1029</i>           | FBgn0263236 | <b>0.200</b> |              |             |              |
| <i>CG5470</i>           | FBgn0038384 | <b>0.199</b> |              |             |              |
| <i>CG30091</i>          | FBgn0050091 | <b>0.187</b> |              |             | <b>11.62</b> |
| <i>CG4650</i>           | FBgn0032549 | <b>0.173</b> | <b>3.36</b>  |             |              |
| <i>CG1773</i>           | FBgn0033439 | <b>0.168</b> | <b>0.148</b> |             |              |
| <i>CG3700</i>           | FBgn0034796 | <b>0.157</b> |              |             |              |
| <i>CG10073</i>          | FBgn0034440 | <b>0.154</b> |              |             |              |
| <i>CG3502</i>           | FBgn0046253 | <b>0.153</b> |              |             |              |
| <i>CG3097</i>           | FBgn0029804 | <b>0.149</b> |              |             |              |
| <i>CG7906</i>           | FBgn0036417 | <b>0.139</b> |              |             |              |
| <i>CG13748</i>          | FBgn0033355 | <b>0.133</b> |              |             |              |
| <i>CG7924</i>           | FBgn0036416 | <b>0.076</b> |              |             |              |
| <i>CG32762</i>          | FBgn0052762 | <b>0.067</b> |              |             |              |
| <i>CG11459</i>          | FBgn0037396 | <b>0.062</b> |              |             |              |
| <i>CG12951</i>          | FBgn0037677 | <b>0.062</b> |              |             |              |
| <b>signaling</b>        |             |              |              |             |              |
| <i>bib</i>              | FBgn0000180 | <b>0.493</b> |              |             |              |
| <i>SoxN</i>             | FBgn0029123 | <b>0.483</b> |              |             |              |
| <i>mthl5</i>            | FBgn0037960 | <b>0.476</b> |              |             | <b>2.17</b>  |
| <i>E(spl)m4-BFM</i>     | FBgn0002629 | <b>0.470</b> |              |             |              |
| <i>CG17760</i>          | FBgn0033756 | <b>0.412</b> | <b>3.33</b>  |             |              |
| <i>Tak1</i>             | FBgn0046689 | <b>0.366</b> |              |             |              |
| <i>CG6908</i>           | FBgn0037936 | <b>0.328</b> |              |             |              |
| <i>Wnt2</i>             | FBgn0004360 | <b>0.304</b> |              |             |              |
| <i>Buffy</i>            | FBgn0040491 | <b>0.297</b> | <b>0.258</b> |             |              |
| <i>CG9259</i>           | FBgn0032913 | <b>0.252</b> |              |             |              |
| <i>CG32447</i>          | FBgn0052447 | <b>0.228</b> |              |             |              |
| <i>CG31104</i>          | FBgn0051104 | <b>0.133</b> |              |             |              |
| <i>Obp83ef</i>          | FBgn0046876 | <b>0.063</b> | <b>0.106</b> |             |              |
| <i>CG11893</i>          | FBgn0039316 | <b>0.045</b> | <b>40.01</b> |             |              |
| <b>tissue structure</b> |             |              |              |             |              |
| <i>Cpr51A</i>           | FBgn0033942 | <b>0.486</b> | <b>0.121</b> |             |              |
| <i>Cpr12A</i>           | FBgn0030494 | <b>0.486</b> |              |             |              |
| <i>Sema-2b</i>          | FBgn0264273 | <b>0.476</b> |              |             |              |
| <i>Pcp</i>              | FBgn0003046 | <b>0.463</b> | <b>0.304</b> |             |              |
| <i>CG12009</i>          | FBgn0035430 | <b>0.438</b> |              |             |              |
| <i>a</i>                | FBgn0000008 | <b>0.420</b> |              |             |              |
| <i>CG11905</i>          | FBgn0036678 | <b>0.374</b> |              |             |              |
| <i>Ama</i>              | FBgn0000071 | <b>0.371</b> | <b>2.27</b>  | <b>2.31</b> | <b>3.01</b>  |
| <i>TwdlE</i>            | FBgn0031957 | <b>0.325</b> |              |             |              |
| <i>CG14957</i>          | FBgn0035412 | <b>0.270</b> |              |             |              |
| <i>b</i>                | FBgn0000153 | <b>0.250</b> |              |             |              |
| <i>Lcp65Ae</i>          | FBgn0020640 | <b>0.245</b> |              |             |              |
| <i>mey</i>              | FBgn0039851 | <b>0.235</b> |              |             |              |

|                         |             |              |              |             |             |
|-------------------------|-------------|--------------|--------------|-------------|-------------|
| <i>Lcp65Ad</i>          | FBgn0020641 | <b>0.230</b> |              |             |             |
| <i>Cpr65Ec</i>          | FBgn0035737 | <b>0.230</b> | <b>2.41</b>  |             |             |
| <i>Acp65Aa</i>          | FBgn0020765 | <b>0.224</b> |              |             |             |
| <i>CG5756</i>           | FBgn0034301 | <b>0.177</b> |              |             |             |
| <i>Cpr66Cb</i>          | FBgn0035875 | <b>0.138</b> |              |             |             |
| <i>CG14687</i>          | FBgn0037835 | <b>0.136</b> |              |             |             |
| <i>Muc68E</i>           | FBgn0053265 | <b>0.080</b> |              |             |             |
| <b>transport</b>        |             |              |              |             |             |
| <i>Porin2</i>           | FBgn0069354 | <b>0.493</b> |              |             |             |
| <i>CG7442</i>           | FBgn0037140 | <b>0.490</b> | <b>0.403</b> |             |             |
| <i>CG5805</i>           | FBgn0039223 | <b>0.486</b> |              |             |             |
| <i>CG31787</i>          | FBgn0051787 | <b>0.483</b> |              |             |             |
| <i>Syx13</i>            | FBgn0036341 | <b>0.480</b> |              |             |             |
| <i>Atet</i>             | FBgn0020762 | <b>0.470</b> |              |             | <b>2.06</b> |
| <i>CG8925</i>           | FBgn0038404 | <b>0.438</b> |              |             |             |
| <i>Orct</i>             | FBgn0019952 | <b>0.426</b> | <b>0.287</b> |             |             |
| <i>Tsp42Ek</i>          | FBgn0033133 | <b>0.418</b> |              |             |             |
| <i>CG14855</i>          | FBgn0038260 | <b>0.418</b> | <b>4.89</b>  |             |             |
| <i>CG7777</i>           | FBgn0033635 | <b>0.415</b> | <b>0.096</b> |             |             |
| <i>yin</i>              | FBgn0265575 | <b>0.398</b> |              | <b>2.05</b> |             |
| <i>Glut1</i>            | FBgn0264574 | <b>0.395</b> |              | <b>2.11</b> |             |
| <i>E23</i>              | FBgn0020445 | <b>0.384</b> | <b>0.156</b> |             |             |
| <i>CG17036</i>          | FBgn0032449 | <b>0.382</b> |              |             |             |
| <i>CG13426</i>          | FBgn0034510 | <b>0.356</b> |              |             |             |
| <i>ZnT35C</i>           | FBgn0028516 | <b>0.264</b> |              |             |             |
| <i>twz</i>              | FBgn0034636 | <b>0.232</b> |              |             | <b>4.25</b> |
| <i>CG3823</i>           | FBgn0029863 | <b>0.212</b> |              |             |             |
| <i>CG31636</i>          | FBgn0051636 | <b>0.210</b> |              |             |             |
| <i>CG2663</i>           | FBgn0037323 | <b>0.209</b> |              |             |             |
| <i>Oatp26F</i>          | FBgn0051634 | <b>0.193</b> |              |             |             |
| <i>CG1732</i>           | FBgn0039915 | <b>0.189</b> | <b>2.49</b>  |             |             |
| <i>bw</i>               | FBgn0000241 | <b>0.163</b> |              |             |             |
| <i>sut2</i>             | FBgn0028562 | <b>0.159</b> | <b>2.00</b>  |             |             |
| <i>CG3649</i>           | FBgn0034785 | <b>0.147</b> |              |             |             |
| <i>CG42269</i>          | FBgn0259164 | <b>0.111</b> |              |             |             |
| <b>unknown function</b> |             |              |              |             |             |
| <i>CG5780</i>           | FBgn0032446 | <b>0.500</b> |              |             |             |
| <i>CG15525</i>          | FBgn0039732 | <b>0.500</b> |              |             |             |
| <i>CG2837</i>           | FBgn0031646 | <b>0.497</b> |              |             |             |
| <i>CG6685</i>           | FBgn0036062 | <b>0.497</b> |              |             |             |
| <i>CG18249</i>          | FBgn0037553 | <b>0.497</b> |              |             |             |
| <i>CG12674</i>          | FBgn0031388 | <b>0.493</b> |              |             |             |
| <i>CG1124</i>           | FBgn0037290 | <b>0.493</b> |              |             | <b>5.25</b> |
| <i>CR6900</i>           | FBgn0030958 | <b>0.493</b> | <b>0.489</b> |             |             |
| <i>CG11882</i>          | FBgn0039642 | <b>0.490</b> |              |             |             |
| <i>CG5968</i>           | FBgn0032588 | <b>0.490</b> |              |             |             |
| <i>CG13962</i>          | FBgn0032824 | <b>0.490</b> | <b>2.09</b>  |             |             |
| <i>CG15210</i>          | FBgn0040850 | <b>0.490</b> | <b>0.350</b> |             |             |
| <i>CG9686</i>           | FBgn0030158 | <b>0.486</b> |              |             |             |
| HDC06936                |             | <b>0.483</b> | <b>0.432</b> |             |             |
| <i>CG31600</i>          | FBgn0051600 | <b>0.483</b> |              |             |             |
| <i>CG12880</i>          | FBgn0046258 | <b>0.483</b> |              |             |             |

|                  |             |              |              |             |              |
|------------------|-------------|--------------|--------------|-------------|--------------|
| <i>Atg18b</i>    | FBgn0032935 | <b>0.480</b> |              |             |              |
| <i>I(1)G0469</i> | FBgn0040153 | <b>0.480</b> |              |             |              |
| <i>CG6675</i>    | FBgn0032973 | <b>0.480</b> |              |             |              |
| <i>CG8031</i>    | FBgn0038110 | <b>0.480</b> | <b>0.390</b> |             |              |
| <i>CG3831</i>    | FBgn0034804 | <b>0.480</b> |              |             | <b>2.22</b>  |
| <i>IM18</i>      | FBgn0067903 | <b>0.480</b> |              |             |              |
| <i>CG10933</i>   | FBgn0034264 | <b>0.476</b> |              |             |              |
| <i>CG13905</i>   | FBgn0035176 | <b>0.473</b> |              |             |              |
| <i>MESK4</i>     | FBgn0043069 | <b>0.473</b> | <b>0.342</b> |             | <b>6.97</b>  |
| <i>Mur29B</i>    | FBgn0051901 | <b>0.470</b> |              |             |              |
| <i>CT36057</i>   |             | <b>0.470</b> |              |             |              |
| <i>CG13618</i>   | FBgn0039203 | <b>0.467</b> |              |             |              |
| <i>HDC06631</i>  |             | <b>0.467</b> | <b>2.80</b>  |             |              |
| <i>CT34146</i>   |             | <b>0.463</b> |              |             |              |
| <i>CG32023</i>   | FBgn0052023 | <b>0.460</b> |              |             |              |
| <i>LD44795</i>   | FBcl0167607 | <b>0.457</b> |              |             |              |
| <i>TwdIT</i>     | FBgn0029170 | <b>0.457</b> |              |             |              |
| <i>orb2</i>      | FBgn0264307 | <b>0.457</b> |              |             |              |
| <i>CG42269</i>   | FBgn0259164 | <b>0.457</b> |              |             |              |
| <i>CG1999</i>    | FBgn0029947 | <b>0.457</b> |              |             |              |
| <i>CG31323</i>   | FBgn0051323 | <b>0.457</b> | <b>0.254</b> |             |              |
| <i>CG13116</i>   | FBgn0032139 | <b>0.454</b> |              | <b>3.50</b> |              |
| <i>CG31324</i>   | FBgn0051324 | <b>0.454</b> |              |             |              |
| <i>CG5194</i>    | FBgn0035955 | <b>0.454</b> |              |             |              |
| <i>CG10912</i>   | FBgn0034296 | <b>0.448</b> |              |             |              |
| <i>CG33096</i>   | FBgn0053096 | <b>0.444</b> |              |             |              |
| <i>CG11275</i>   | FBgn0034706 | <b>0.444</b> | <b>0.279</b> |             |              |
| <i>CG18343</i>   | FBgn0033683 | <b>0.444</b> |              |             |              |
| <i>spz6</i>      | FBgn0035056 | <b>0.444</b> |              |             |              |
| <i>CG31538</i>   | FBgn0051538 | <b>0.444</b> |              |             |              |
| <i>CG11474</i>   | FBgn0034688 | <b>0.444</b> | <b>0.238</b> |             |              |
| <i>CG14567</i>   | FBgn0037126 | <b>0.441</b> | <b>0.369</b> |             |              |
| <i>CG9837</i>    | FBgn0037635 | <b>0.441</b> |              |             | <b>0.320</b> |
| <i>CG34424</i>   | FBgn0085453 | <b>0.441</b> |              |             |              |
| <i>CG13255</i>   | FBgn0040636 | <b>0.438</b> | <b>0.270</b> |             |              |
| <i>CG3223</i>    | FBgn0037538 | <b>0.438</b> |              |             |              |
| <i>CG32259</i>   | FBgn0052259 | <b>0.438</b> |              |             |              |
| <i>CG31861</i>   | FBgn0051861 | <b>0.432</b> |              |             |              |
| <i>CG13186</i>   | FBgn0033680 | <b>0.432</b> |              |             |              |
| <i>CG14109</i>   | FBgn0036364 | <b>0.432</b> | <b>8.40</b>  |             |              |
| <i>CIAPIN1</i>   | FBgn0001977 | <b>0.432</b> |              |             |              |
| <i>CG1273</i>    | FBgn0035522 | <b>0.429</b> |              |             |              |
| <i>CG33252</i>   | FBgn0053252 | <b>0.429</b> |              |             |              |
| <i>Gbp</i>       | FBgn0034199 | <b>0.429</b> |              | <b>8.40</b> | <b>2.72</b>  |
| <i>CG18190</i>   | FBgn0034403 | <b>0.429</b> | <b>8.35</b>  |             |              |
| <i>CG13488</i>   | FBgn0034670 | <b>0.426</b> |              |             |              |
| <i>CG8160</i>    | FBgn0034011 | <b>0.423</b> | <b>12.11</b> |             |              |
| <i>CG9801</i>    | FBgn0037623 | <b>0.423</b> | <b>0.360</b> |             | <b>4.13</b>  |
| <i>CG4438</i>    | FBgn0032115 | <b>0.423</b> |              |             |              |
| <i>CG14275</i>   | FBgn0032022 | <b>0.415</b> | <b>35.52</b> |             |              |
| <i>CG12655</i>   | FBgn0031080 | <b>0.406</b> | <b>7.38</b>  |             |              |
| <i>CG15544</i>   | FBgn0039804 | <b>0.406</b> |              |             | <b>2.40</b>  |

|                   |             |              |              |              |             |
|-------------------|-------------|--------------|--------------|--------------|-------------|
| <i>LP03188</i>    | FBcl0187891 | <b>0.406</b> |              |              |             |
| <i>CG15905</i>    | FBgn0034462 | <b>0.403</b> |              |              |             |
| <i>NnaD</i>       | FBgn0265726 | <b>0.401</b> |              |              |             |
| HDC12400          |             | <b>0.398</b> |              |              |             |
| <i>CG40294</i>    | FBgn0058294 | <b>0.398</b> |              |              |             |
| <i>CG7841</i>     | FBgn0036502 | <b>0.398</b> |              |              |             |
| <i>CG11737</i>    | FBgn0037592 | <b>0.395</b> |              |              |             |
| <i>CG31525</i>    | FBgn0051525 | <b>0.392</b> |              |              |             |
| <i>CG9040</i>     | FBgn0036394 | <b>0.392</b> | <b>4.54</b>  |              |             |
| CR_TC_GH03576     |             | <b>0.390</b> |              |              |             |
| <i>CG12470</i>    | FBgn0040371 | <b>0.387</b> |              |              |             |
| <i>Dtg</i>        | FBgn0038071 | <b>0.387</b> |              |              |             |
| <i>CG2444</i>     | FBgn0030326 | <b>0.384</b> |              |              |             |
| <i>nyo</i>        | FBgn0039852 | <b>0.374</b> |              |              |             |
| <i>CG15818</i>    | FBgn0031910 | <b>0.374</b> |              |              |             |
| <i>CG30417</i>    | FBgn0050417 | <b>0.371</b> |              |              |             |
| HDC14735          |             | <b>0.371</b> |              |              |             |
| <i>Ste</i>        | FBgn0003523 | <b>0.366</b> |              |              |             |
| <i>CG15068</i>    | FBgn0040733 | <b>0.363</b> | <b>14.12</b> |              |             |
| <i>RE54004</i>    | FBcl0204065 | <b>0.361</b> |              |              |             |
| DM.2L.4959        |             | <b>0.361</b> |              |              |             |
| <i>CG7778</i>     | FBgn0032025 | <b>0.356</b> |              |              |             |
| <i>CG2201</i>     | FBgn0032955 | <b>0.349</b> |              |              |             |
| <i>CG13856</i>    | FBgn0038959 | <b>0.342</b> |              |              |             |
| <i>CG32115</i>    | FBgn0052115 | <b>0.332</b> | <b>0.362</b> |              |             |
| <i>CG12481</i>    | FBgn0030542 | <b>0.325</b> |              |              |             |
| <i>CG13024</i>    | FBgn0036665 | <b>0.325</b> |              |              |             |
| <i>CG13082</i>    | FBgn0032803 | <b>0.321</b> |              |              |             |
| <i>CG1172</i>     | FBgn0264712 | <b>0.316</b> |              |              |             |
| <i>CG2082</i>     | FBgn0027608 | <b>0.314</b> | <b>0.284</b> |              |             |
| <i>CG15208</i>    | FBgn0030247 | <b>0.308</b> |              |              |             |
| <i>CG33143</i>    | FBgn0053143 | <b>0.304</b> |              |              |             |
| <i>CG15756</i>    | FBgn0030493 | <b>0.301</b> |              |              |             |
| <i>CG10516</i>    | FBgn0036549 | <b>0.293</b> |              |              | <b>2.10</b> |
| <i>CG18622</i>    | FBgn0038460 | <b>0.291</b> |              |              |             |
| <i>CG2082</i>     | FBgn0027608 | <b>0.289</b> | <b>0.284</b> |              |             |
| <i>CG2277</i>     | FBgn0035204 | <b>0.272</b> |              |              |             |
| <i>CG5391</i>     | FBgn0038943 | <b>0.268</b> |              |              |             |
| <i>CG8483</i>     | FBgn0038126 | <b>0.268</b> |              |              |             |
| <i>CG13722</i>    | FBgn0035553 | <b>0.238</b> |              |              |             |
| <i>CG13314</i>    | FBgn0035949 | <b>0.207</b> |              |              |             |
| <i>CG16836</i>    | FBgn0040735 | <b>0.207</b> | <b>20.27</b> |              |             |
| <i>CG16886</i>    | FBgn0028938 | <b>0.204</b> |              |              |             |
| <i>CG34296</i>    | FBgn0085325 | <b>0.132</b> |              |              |             |
| <i>CG4151</i>     | FBgn0029770 | <b>0.117</b> | <b>0.366</b> |              |             |
| <i>CR43242</i>    | FBgn0262887 | <b>0.097</b> |              | <b>0.252</b> |             |
| <i>pncr015:3L</i> | FBgn0063083 | <b>0.086</b> |              |              |             |
| <i>CG5697</i>     | FBgn0038846 | <b>0.045</b> |              |              |             |
| <i>CG9822</i>     | FBgn0034623 | <b>0.036</b> |              |              |             |
| <i>CG42717</i>    | FBgn0261634 | <b>0.032</b> |              |              |             |

Transcripts that are up- or down-regulated by homozygous null mutation of *Chd1* in L3 larvae or RNAi-mediated depletion of H1 in L3 salivary glands, HP1 in Kc cells and ISWI in SL2 cells. Fold change is calculated from Affymetrix microarray data relative to wild-type control.
