# Supplementary material for: A Genetic Screen and Transcript Profiling Reveal a Shared Regulatory Program for Drosophila Linker Histone H1 and Chromatin Remodeler CHD1
Source: PubMed Central journal article supplement (PMC4390582; doi:10.1534/g3.115.016709), 2015-01-27
Supplement: supp_g3.115.016709_TableS3.pdf [file supp_g3.115.016709_TableS3.pdf]

Table S3 Overlap of transcripts regulated by HP1, H1 and CHD1.

| SYMBOL/<br>TRANSCRIPT           | FLYBASE ID  | FOLD CHANGE   |              |              |
|---------------------------------|-------------|---------------|--------------|--------------|
|                                 |             | HP1 KD        | H1 KD        | <i>Chd1</i>  |
| <b>HP1 depletion effect: UP</b> |             |               |              |              |
| <i>CR31451</i>                  | FBgn0051451 | <b>181.09</b> | <b>8.26</b>  |              |
| <i>CG31140</i>                  | FBgn0051140 | <b>79.80</b>  | <b>6.31</b>  |              |
| <i>G6</i>                       | FBte0000958 | <b>67.66</b>  |              |              |
| <i>CG31642</i>                  | FBgn0051642 | <b>51.14</b>  |              | <b>0.435</b> |
| <i>AT07338</i>                  | FBcl0481740 | <b>50.00</b>  |              |              |
| <i>TART</i>                     |             | <b>35.15</b>  |              |              |
| <i>CG3635</i>                   | FBgn0032981 | <b>34.71</b>  | <b>6.77</b>  |              |
| <i>CG18605</i>                  | FBgn0034411 | <b>24.98</b>  |              |              |
| <i>Def</i>                      | FBgn0010385 | <b>22.33</b>  |              |              |
| <i>CG10126</i>                  | FBgn0038088 | <b>21.46</b>  |              |              |
| <i>springer</i>                 | FBte0000333 | <b>20.62</b>  |              |              |
| <i>CG17124</i>                  | FBgn0032297 | <b>20.00</b>  | <b>2.46</b>  |              |
| <i>gypsy6</i>                   | FBte0001175 | <b>19.16</b>  |              |              |
| <i>CG11714</i>                  | FBgn0036170 | <b>19.04</b>  | <b>3.88</b>  |              |
| <i>CG40295</i>                  | FBgn0058295 | <b>18.09</b>  | <b>11.97</b> |              |
| <i>HDC20537</i>                 |             | <b>16.14</b>  | <b>2.13</b>  |              |
| <i>CG5773</i>                   | FBgn0034290 | <b>15.22</b>  |              |              |
| <i>CG13795</i>                  | FBgn0031937 | <b>13.84</b>  |              |              |
| <i>CG5171</i>                   | FBgn0031907 | <b>12.85</b>  |              | <b>0.149</b> |
| <i>accord</i>                   | FBte0000956 | <b>11.76</b>  |              |              |
| <i>CG5399</i>                   | FBgn0038353 | <b>11.64</b>  | <b>28.01</b> | <b>2.06</b>  |
| <i>CG32091</i>                  | FBgn0052091 | <b>10.80</b>  |              |              |
| <i>edin</i>                     | FBgn0052185 | <b>10.48</b>  |              |              |
| <i>CG32032</i>                  | FBgn0043806 | <b>10.10</b>  |              |              |
| <i>gypsy2</i>                   | FBte0001040 | <b>9.84</b>   |              |              |
| <i>tok</i>                      | FBgn0004885 | <b>9.72</b>   | <b>2.11</b>  |              |
| <i>CG9691</i>                   | FBgn0030160 | <b>9.48</b>   |              |              |
| <i>Yp3</i>                      | FBgn0004047 | <b>9.00</b>   |              | <b>0.180</b> |
| <i>invader3</i>                 | FBte0000619 | <b>8.99</b>   |              |              |
| <i>CG13315</i>                  | FBgn0040827 | <b>8.90</b>   |              |              |
| <i>CG3961</i>                   | FBgn0036821 | <b>8.86</b>   |              |              |
| <i>CAH1</i>                     | FBgn0027844 | <b>8.65</b>   | <b>2.25</b>  | <b>0.493</b> |
| <i>AttC</i>                     | FBgn0041579 | <b>8.50</b>   |              |              |
| <i>gypsy</i>                    | FBte0000021 | <b>8.45</b>   |              |              |
| <i>Cyp6a13</i>                  | FBgn0033304 | <b>8.40</b>   | <b>5.64</b>  |              |
| <i>Drs</i>                      | FBgn0010381 | <b>8.33</b>   | <b>4.28</b>  | <b>0.451</b> |
| <i>ldgf1</i>                    | FBgn0020416 | <b>8.29</b>   |              |              |
| <i>Cyp12e1</i>                  | FBgn0037817 | <b>8.15</b>   |              |              |
| <i>HMS-Beagle</i>               | FBte0000726 | <b>7.86</b>   |              |              |
| <i>CG33775</i>                  | FBgn0053775 | <b>7.68</b>   |              |              |
| <i>KCNQ</i>                     | FBgn0033494 | <b>7.66</b>   |              |              |
| <i>Gpb5</i>                     | FBgn0063368 | <b>7.47</b>   |              |              |
| <i>Gr94a</i>                    | FBgn0041225 | <b>7.33</b>   | <b>5.19</b>  |              |
| <i>CG33468</i>                  | FBgn0053468 | <b>7.30</b>   | <b>4.91</b>  | <b>2.46</b>  |
| <i>CG4752</i>                   | FBgn0034733 | <b>7.25</b>   |              |              |
| <i>CG9981</i>                   | FBgn0030746 | <b>7.06</b>   |              | <b>2.77</b>  |
| <i>aret</i>                     | FBgn0000114 | <b>6.89</b>   |              |              |

|                    |             |      |       |       |
|--------------------|-------------|------|-------|-------|
| CG45057            | FBgn0266417 | 6.74 | 2.20  |       |
| <i>Cyp6d4</i>      | FBgn0039006 | 6.66 |       |       |
| <i>CG40115</i>     | FBgn0058115 | 6.47 | 10.26 |       |
| <i>HDC20531</i>    |             | 6.34 |       |       |
| <i>Sid</i>         | FBgn0039593 | 6.31 |       | 0.261 |
| <i>CT39784</i>     |             | 6.11 | 14.84 |       |
| <i>HDC20523</i>    |             | 6.01 | 2.81  |       |
| <i>CG11672</i>     | FBgn0037563 | 5.98 |       |       |
| <i>Tsf3</i>        | FBgn0034094 | 5.89 |       |       |
| <i>Rh4</i>         | FBgn0003250 | 5.82 |       |       |
| <i>CG10877</i>     | FBgn0038804 | 5.73 | 0.157 |       |
| <i>CG9717</i>      | FBgn0039789 | 5.71 |       |       |
| <i>CG18473</i>     | FBgn0037683 | 5.69 | 3.14  |       |
| <i>bru-3</i>       | FBgn0264001 | 5.67 |       |       |
| <i>rau</i>         | FBgn0031745 | 5.63 |       |       |
| <i>CG15661</i>     | FBgn0034605 | 5.55 | 12.72 |       |
| <i>Gbp</i>         | FBgn0034199 | 5.52 |       | 0.429 |
| <i>CG3940</i>      | FBgn0037788 | 5.43 |       | 0.356 |
| <i>CG10799</i>     | FBgn0033821 | 5.41 | 3.26  |       |
| <i>PGRP-SD</i>     | FBgn0035806 | 5.40 |       |       |
| <i>PGRP-SC2</i>    | FBgn0043575 | 5.39 | 2.66  | 0.222 |
| <i>Cyp12e1</i>     | FBgn0037817 | 5.34 |       |       |
| <i>CG14164</i>     | FBgn0036057 | 5.31 |       |       |
| <i>AttA</i>        | FBgn0012042 | 5.30 |       | 0.337 |
| <i>CG4928</i>      | FBgn0027556 | 5.30 | 0.315 |       |
| <i>CG14695</i>     | FBgn0037850 | 5.29 |       |       |
| <i>Zasp52</i>      | FBgn0265991 | 5.26 | 0.492 |       |
| <i>CG5367</i>      | FBgn0032228 | 5.24 |       |       |
| <i>CG18446</i>     | FBgn0033458 | 5.20 | 2.05  | 0.395 |
| <i>Mct1</i>        | FBgn0023549 | 5.19 | 0.395 |       |
| <i>invader4</i>    | FBte0000292 | 5.17 |       |       |
| <i>Pka-C3</i>      | FBgn0000489 | 5.16 |       |       |
| <i>CG17124</i>     | FBgn0032297 | 5.14 | 4.46  |       |
| <i>CG9919</i>      | FBgn0030742 | 5.13 |       |       |
| <i>SPH93</i>       | FBgn0032638 | 5.12 | 11.67 |       |
| <i>Corp</i>        | FBgn0030028 | 5.08 | 4.57  |       |
| <i>Apoltp</i>      | FBgn0032136 | 5.06 | 2.89  | 5.70  |
| <i>spir</i>        | FBgn0003475 | 5.06 |       |       |
| <i>CG8586</i>      | FBgn0033320 | 5.03 |       | 0.438 |
| <i>CG11052</i>     | FBgn0040524 | 5.03 |       |       |
| <i>yin</i>         | FBgn0265575 | 5.00 | 0.449 | 0.398 |
| <i>CG43110</i>     | FBgn0262570 | 4.99 | 0.432 |       |
| <i>Cyp9c1</i>      | FBgn0015040 | 4.93 |       | 3.41  |
| <i>CG5381</i>      | FBgn0032218 | 4.85 |       |       |
| <i>CG32687</i>     | FBgn0052687 | 4.82 | 2.09  |       |
| <i>Cad96Ca</i>     | FBgn0022800 | 4.81 |       |       |
| <i>Tsp2A</i>       | FBgn0024361 | 4.77 |       |       |
| <i>Cyp28d1</i>     | FBgn0031689 | 4.76 |       |       |
| <i>Mctp</i>        | FBgn0034389 | 4.72 | 0.300 | 2.95  |
| <i>Ama</i>         | FBgn0000071 | 4.72 | 2.27  | 0.371 |
| <i>Jheh3</i>       | FBgn0034406 | 4.69 |       | 2.68  |
| <i>alphaTub67C</i> | FBgn0087040 | 4.63 |       |       |

|             |             |      |       |       |
|-------------|-------------|------|-------|-------|
| CG5731      | FBgn0032192 | 4.60 | 2.72  |       |
| GstE3       | FBgn0063497 | 4.59 |       | 0.432 |
| CG40124     | FBgn0058124 | 4.58 | 11.10 |       |
| CG5853      | FBgn0032167 | 4.57 |       |       |
| CT39116     |             | 4.56 | 103.1 |       |
| CG14606     | FBgn0037485 | 4.54 |       |       |
| shf         | FBgn0003390 | 4.52 | 2.97  |       |
| CG1294      | FBgn0033030 | 4.49 | 4.55  |       |
| ItgalphaPS4 | FBgn0034005 | 4.49 | 3.91  |       |
| PGRP-SA     | FBgn0030310 | 4.46 | 2.20  |       |
| Cyp4p3      | FBgn0033397 | 4.43 | 9.73  | 8.75  |
| CG6709      | FBgn0036056 | 4.43 | 2.66  |       |
| HDC20116    |             | 4.41 |       |       |
| Cyp12a5     | FBgn0038680 | 4.30 |       |       |
| CG12698     | FBgn0030721 | 4.26 |       |       |
| CG9170      | FBgn0030716 | 4.26 | 3.83  |       |
| qbert       |             | 4.26 |       |       |
| RpS5b       | FBgn0038277 | 4.25 |       |       |
| AttB        | FBgn0041581 | 4.22 |       |       |
| Hf          | FBgn0014000 | 4.22 |       |       |
| l(3)neo38   | FBgn0265276 | 4.17 |       |       |
| HDC20280    |             | 4.17 |       |       |
| CG6330      | FBgn0039464 | 4.15 |       |       |
| beat-IIIc   | FBgn0032629 | 4.13 | 2.39  |       |
| alphaTub85E | FBgn0003886 | 4.12 |       |       |
| Swim        | FBgn0034709 | 4.11 | 9.06  |       |
| Mal-A5      | FBgn0050359 | 4.11 |       |       |
| GstE11      | FBgn0034354 | 4.06 | 0.341 |       |
| CG2930      | FBgn0028491 | 4.06 |       |       |
| Eip78C      | FBgn0004865 | 4.04 | 0.136 | 0.144 |
| Epac        | FBgn0085421 | 4.01 | 9.43  |       |
| CG3246      | FBgn0031538 | 4.00 |       |       |
| TpnC4       | FBgn0033027 | 4.00 | 3.70  |       |
| TART        |             | 3.97 |       |       |
| Myo28B1     | FBgn0040299 | 3.95 | 2.21  |       |
| CG14451     | FBgn0037183 | 3.94 |       |       |
| kek1        | FBgn0015399 | 3.90 | 5.43  |       |
| Esyt2       | FBgn0266758 | 3.88 |       |       |
| CG13117     | FBgn0032140 | 3.85 | 2.71  |       |
| CG40274     | FBgn0058274 | 3.85 | 5.22  |       |
| micropia    | FBte0000042 | 3.83 |       |       |
| CG5322      | FBgn0032253 | 3.80 |       |       |
| CG11400     | FBgn0034198 | 3.78 | 19.24 |       |
| CG16947     | FBgn0031816 | 3.78 | 0.285 |       |
| GATE        | FBte0000359 | 3.78 |       |       |
| NT5E-2      | FBgn0050104 | 3.76 | 0.196 |       |
| CG9150      | FBgn0031775 | 3.72 |       |       |
| spir        | FBgn0003475 | 3.67 |       |       |
| lr41a       | FBgn0040849 | 3.67 |       |       |
| Tsp42Ed     | FBgn0029507 | 3.66 |       |       |
| l(3)neo38   | FBgn0265276 | 3.65 |       |       |
| l(3)neo38   | FBgn0265276 | 3.65 |       |       |

|            |             |      |       |       |
|------------|-------------|------|-------|-------|
| CG12868    | FBgn0033945 | 3.64 | 2.74  |       |
| CG17032    | FBgn0036547 | 3.63 |       |       |
| CG31272    | FBgn0051272 | 3.62 |       |       |
| Hsp68      | FBgn0001230 | 3.60 |       |       |
| loh        | FBgn0032252 | 3.59 | 2.15  |       |
| Tl         | FBgn0262473 | 3.58 | 2.30  |       |
| sdk        | FBgn0021764 | 3.58 |       |       |
| CG4301     | FBgn0030747 | 3.58 |       |       |
| aret       | FBgn0000114 | 3.58 |       |       |
| rdgB       | FBgn0003218 | 3.58 |       |       |
| bgm        | FBgn0027348 | 3.58 | 4.62  |       |
| vir-1      | FBgn0043841 | 3.56 | 8.76  |       |
| CG43658    | FBgn0263706 | 3.53 |       |       |
| LysX       | FBgn0004431 | 3.51 | 33.21 | 0.344 |
| eIF4E-6    | FBgn0039622 | 3.50 |       |       |
| fend       | FBgn0030090 | 3.47 | 3.52  |       |
| CG3679     | FBgn0027521 | 3.43 | 4.21  |       |
| wrapper    | FBgn0025878 | 3.42 |       |       |
| Glut1      | FBgn0264574 | 3.36 | 0.312 | 0.395 |
| CG34232    | FBgn0085261 | 3.35 |       |       |
| CG12926    | FBgn0033437 | 3.34 | 0.415 |       |
| HDC20112   |             | 3.32 |       |       |
| HMS-Beagle | FBte0000726 | 3.32 |       |       |
| Pepck      | FBgn0003067 | 3.29 |       | 2.30  |
| Mtk        | FBgn0014865 | 3.29 |       | 0.438 |
| Listericin | FBgn0033593 | 3.28 |       |       |
| Ugt35a     | FBgn0026315 | 3.27 | 3.35  | 2.53  |
| Ndae1      | FBgn0259111 | 3.26 |       | 2.10  |
| rdgB       | FBgn0003218 | 3.26 |       |       |
| CG4269     | FBgn0034741 | 3.25 |       |       |
| sda        | FBgn0015541 | 3.24 |       |       |
| CG17207    | FBgn0038051 | 3.24 |       |       |
| mthl14     | FBgn0052476 | 3.23 | 15.70 |       |
| Spn31A     | FBgn0032178 | 3.22 |       |       |
| CG5096     | FBgn0032235 | 3.19 | 3.96  |       |
| nerfin-2   | FBgn0041105 | 3.18 |       |       |
| CG10405    | FBgn0038431 | 3.16 |       |       |
| hiw        | FBgn0030600 | 3.15 |       |       |
| Arc1       | FBgn0033926 | 3.15 |       |       |
| CG6357     | FBgn0033875 | 3.14 | 10.96 |       |
| Nep2       | FBgn0027570 | 3.13 |       | 0.283 |
| d          | FBgn0262029 | 3.13 |       |       |
| AttD       | FBgn0038530 | 3.13 | 72.76 |       |
| Fie        | FBgn0026592 | 3.12 | 2.46  |       |
| CG40040    | FBgn0058040 | 3.10 |       |       |
| l(3)neo38  | FBgn0265276 | 3.10 |       |       |
| CG32625    | FBgn0052625 | 3.09 | 39.17 |       |
| CG9360     | FBgn0030332 | 3.06 | 10.35 |       |
| CG3568     | FBgn0029710 | 3.03 |       |       |
| CG31626    | FBgn0051626 | 3.00 | 19.15 |       |
| CG32313    | FBgn0052313 | 3.00 |       |       |
| spir       | FBgn0003475 | 3.00 | 2.15  |       |

|                     |             |             |              |             |
|---------------------|-------------|-------------|--------------|-------------|
| <i>tyn</i>          | FBgn0029128 | <b>3.00</b> |              |             |
| <i>hdm</i>          | FBgn0029977 | <b>2.98</b> |              |             |
| <i>CG42822</i>      | FBgn0262004 | <b>2.98</b> |              |             |
| <i>CG32944</i>      | FBgn0052944 | <b>2.97</b> |              |             |
| <i>CG33346</i>      | FBgn0053346 | <b>2.97</b> |              |             |
| <i>alpha-Est3</i>   | FBgn0015571 | <b>2.97</b> |              |             |
| <i>CG5191</i>       | FBgn0038803 | <b>2.97</b> | <b>0.403</b> |             |
| <i>CG4297</i>       | FBgn0031258 | <b>2.97</b> | <b>0.429</b> |             |
| <i>dys</i>          | FBgn0039411 | <b>2.96</b> |              |             |
| <i>Ef1alpha100E</i> | FBgn0000557 | <b>2.95</b> |              |             |
| <i>QC</i>           | FBgn0052412 | <b>2.95</b> |              |             |
| <i>stv</i>          | FBgn0086708 | <b>2.94</b> |              | <b>2.53</b> |
| <i>ZnT77C</i>       | FBgn0037000 | <b>2.92</b> |              |             |
| <i>CG8738</i>       | FBgn0033321 | <b>2.91</b> |              |             |
| <i>CG3251</i>       | FBgn0031622 | <b>2.90</b> |              |             |
| <i>d</i>            | FBgn0262029 | <b>2.90</b> |              |             |
| <i>ldgf2</i>        | FBgn0020415 | <b>2.90</b> | <b>2.56</b>  |             |
| <i>CG33494</i>      | FBgn0053494 | <b>2.89</b> |              |             |
| <i>CG16749</i>      | FBgn0037678 | <b>2.88</b> |              |             |
| <i>HDC20377</i>     |             | <b>2.86</b> |              |             |
| <i>CG33144</i>      | FBgn0053144 | <b>2.86</b> |              |             |
| <i>Mdr49</i>        | FBgn0004512 | <b>2.86</b> | <b>3.38</b>  |             |
| <i>Cyp6a8</i>       | FBgn0013772 | <b>2.83</b> |              |             |
| <i>Cyp6a2</i>       | FBgn0000473 | <b>2.80</b> |              | <b>30.5</b> |
| <i>RapGAP1</i>      | FBgn0264895 | <b>2.80</b> | <b>0.339</b> |             |
| <i>CG6495</i>       | FBgn0027550 | <b>2.80</b> |              |             |
| <i>CG32982</i>      | FBgn0052982 | <b>2.79</b> | <b>2.33</b>  |             |
| <i>Cyp4p1</i>       | FBgn0015037 | <b>2.79</b> |              |             |
| <i>GstD5</i>        | FBgn0010041 | <b>2.78</b> | <b>20.38</b> |             |
| <i>Het-A</i>        |             | <b>2.75</b> |              |             |
| <i>Kaz1-ORFB</i>    | FBgn0063923 | <b>2.75</b> | <b>4.27</b>  |             |
| <i>CG30456</i>      | FBgn0050456 | <b>2.74</b> |              |             |
| <i>wisp</i>         | FBgn0260780 | <b>2.74</b> |              |             |
| <i>CG8349</i>       | FBgn0032003 | <b>2.73</b> |              |             |
| <i>CHKov2</i>       | FBgn0039328 | <b>2.72</b> |              |             |
| <i>CG8046</i>       | FBgn0033388 | <b>2.71</b> |              |             |
| <i>R1</i>           |             | <b>2.71</b> |              |             |
| <i>Rbf</i>          | FBgn0015799 | <b>2.71</b> |              |             |
| <i>CG4741</i>       | FBgn0035040 | <b>2.70</b> |              |             |
| <i>CG2217</i>       | FBgn0027544 | <b>2.69</b> | <b>0.431</b> |             |
| <i>Ugt86Da</i>      | FBgn0040259 | <b>2.68</b> | <b>8.97</b>  | <b>2.28</b> |
| <i>btn</i>          | FBgn0014949 | <b>2.68</b> |              |             |
| <i>Jhl-26</i>       | FBgn0028424 | <b>2.68</b> | <b>7.00</b>  | <b>3.84</b> |
| <i>AOX1</i>         | FBgn0267408 | <b>2.67</b> | <b>14.75</b> | <b>2.60</b> |
| <i>stai</i>         | FBgn0266521 | <b>2.67</b> |              |             |
| <i>lr41a</i>        | FBgn0040849 | <b>2.66</b> |              |             |
| <i>Ugt86Dd</i>      | FBgn0040256 | <b>2.65</b> | <b>4.15</b>  |             |
| <i>PKD</i>          | FBgn0038603 | <b>2.65</b> |              | <b>2.04</b> |
| <i>Thor</i>         | FBgn0261560 | <b>2.63</b> |              |             |
| <i>CG4398</i>       | FBgn0034126 | <b>2.62</b> | <b>0.052</b> |             |
| <i>CG14692</i>      | FBgn0037836 | <b>2.61</b> |              |             |
| <i>CG16712</i>      | FBgn0031561 | <b>2.60</b> | <b>7.20</b>  | <b>2.48</b> |

|                 |             |      |       |       |
|-----------------|-------------|------|-------|-------|
| <i>Arc1</i>     | FBgn0033926 | 2.59 | 5.93  |       |
| <i>Rhp</i>      | FBgn0026374 | 2.57 | 0.328 |       |
| <i>COX7AL</i>   | FBgn0037579 | 2.57 |       |       |
| <i>CG8066</i>   | FBgn0038243 | 2.56 | 5.94  |       |
| <i>Muc14A</i>   | FBgn0052580 | 2.56 |       |       |
| <i>CG15611</i>  | FBgn0034194 | 2.56 |       |       |
| <i>Gs2</i>      | FBgn0001145 | 2.55 | 3.09  |       |
| <i>CG33784</i>  | FBgn0053784 | 2.55 |       |       |
| <i>KFase</i>    | FBgn0031821 | 2.53 |       |       |
| <i>Gnmt</i>     | FBgn0038074 | 2.53 | 8.13  |       |
| <i>CG17549</i>  | FBgn0032774 | 2.52 |       |       |
| <i>pirk</i>     | FBgn0034647 | 2.51 |       |       |
| <i>Doc2</i>     | FBgn0035956 | 2.50 |       |       |
| <i>Hsp67Bc</i>  | FBgn0001229 | 2.49 | 2.74  | 0.200 |
| <i>egr</i>      | FBgn0033483 | 2.49 |       |       |
| <i>CG7191</i>   | FBgn0031945 | 2.48 |       |       |
| <i>CG3397</i>   | FBgn0037975 | 2.48 |       | 0.162 |
| <i>GstE7</i>    | FBgn0063493 | 2.48 |       | 8.94  |
| <i>GstE10</i>   | FBgn0063499 | 2.48 |       |       |
| <i>CG11897</i>  | FBgn0039644 | 2.48 | 5.52  | 2.14  |
| <i>ome</i>      | FBgn0259175 | 2.47 |       |       |
| <i>CG30022</i>  | FBgn0050022 | 2.47 |       |       |
| <i>CG8008</i>   | FBgn0033387 | 2.46 |       |       |
| <i>CG4822</i>   | FBgn0031220 | 2.45 | 0.410 |       |
| <i>CG5783</i>   | FBgn0032670 | 2.45 | 0.388 |       |
| <i>spri</i>     | FBgn0085443 | 2.45 |       |       |
| <i>Traf4</i>    | FBgn0026319 | 2.44 |       |       |
| <i>CG4829</i>   | FBgn0030796 | 2.43 |       |       |
| <i>be</i>       | FBgn0052594 | 2.42 |       |       |
| <i>CG8870</i>   | FBgn0038144 | 2.41 |       |       |
| <i>Ptth</i>     | FBgn0013323 | 2.39 |       |       |
| <i>KP78b</i>    | FBgn0026063 | 2.38 | 6.25  |       |
| <i>CG14692</i>  | FBgn0037836 | 2.38 |       |       |
| <i>Ror</i>      | FBgn0010407 | 2.38 |       |       |
| <i>CG14642</i>  | FBgn0037222 | 2.37 | 3.23  |       |
| <i>pdm3</i>     | FBgn0261588 | 2.37 |       |       |
| <i>CG17029</i>  | FBgn0036551 | 2.37 |       |       |
| <i>CG1358</i>   | FBgn0033196 | 2.36 |       |       |
| <i>CG13813</i>  | FBgn0036956 | 2.36 |       |       |
| <i>egr</i>      | FBgn0033483 | 2.36 |       |       |
| <i>Inx3</i>     | FBgn0265274 | 2.35 |       |       |
| <i>HDC20468</i> |             | 2.35 | 8.59  |       |
| <i>CG6287</i>   | FBgn0032350 | 2.35 |       | 0.382 |
| <i>CG43064</i>  | FBgn0262366 | 2.34 |       |       |
| <i>Pask</i>     | FBgn0034950 | 2.32 |       |       |
| <i>DptB</i>     | FBgn0034407 | 2.32 |       |       |
| <i>CG32521</i>  | FBgn0052521 | 2.32 |       |       |
| <i>mtt</i>      | FBgn0050361 | 2.32 |       |       |
| <i>Mef2</i>     | FBgn0011656 | 2.32 |       |       |
| <i>CG30022</i>  | FBgn0050022 | 2.31 |       |       |
| <i>CG18547</i>  | FBgn0037973 | 2.30 | 4.73  |       |
| <i>Mmp1</i>     | FBgn0035049 | 2.30 | 15.55 | 0.264 |

|                   |             |      |       |       |
|-------------------|-------------|------|-------|-------|
| <i>GstD2</i>      | FBgn0010038 | 2.30 | 9.61  | 0.235 |
| <i>Nha2</i>       | FBgn0263390 | 2.29 | 2.28  | 6.11  |
| <i>IP3K2</i>      | FBgn0266375 | 2.29 |       |       |
| <i>CG13116</i>    | FBgn0032139 | 2.29 |       | 0.454 |
| <i>Sip1</i>       | FBgn0010620 | 2.29 | 0.396 |       |
| <i>CG4502</i>     | FBgn0031896 | 2.28 |       |       |
| <i>Ect4</i>       | FBgn0262579 | 2.28 |       | 2.06  |
| <i>yellow-f</i>   | FBgn0041710 | 2.27 | 0.330 | 0.358 |
| <i>CG31743</i>    | FBgn0032618 | 2.27 |       | 2.60  |
| <i>tilB</i>       | FBgn0014395 | 2.27 |       |       |
| <i>CG13893</i>    | FBgn0035146 | 2.27 |       |       |
| <i>l(2)03659</i>  | FBgn0010549 | 2.26 | 3.15  |       |
| <i>CR32207</i>    | FBgn0052207 | 2.26 | 12.38 |       |
| <i>GstE2</i>      | FBgn0063498 | 2.25 |       |       |
| <i>CG7255</i>     | FBgn0036493 | 2.24 | 0.448 |       |
| <i>CG31253</i>    | FBgn0051253 | 2.24 |       |       |
| <i>eater</i>      | FBgn0243514 | 2.24 | 8.00  |       |
| <i>HDC20224</i>   |             | 2.23 | 5.63  |       |
| <i>CG7203</i>     | FBgn0031942 | 2.23 |       |       |
| <i>CG13912</i>    | FBgn0035186 | 2.23 |       | 2.27  |
| <i>CG42240</i>    | FBgn0250869 | 2.23 | 0.403 |       |
| <i>CG13698</i>    | FBgn0036773 | 2.23 |       |       |
| <i>CG11686</i>    | FBgn0040551 | 2.22 |       |       |
| <i>CG44325</i>    | FBgn0265413 | 2.21 |       |       |
| <i>rst</i>        | FBgn0003285 | 2.21 | 13.17 |       |
| <i>GstT4</i>      | FBgn0030484 | 2.21 | 2.14  | 2.11  |
| <i>CG7627</i>     | FBgn0032026 | 2.21 |       |       |
| <i>IP3K2</i>      | FBgn0266375 | 2.21 |       |       |
| <i>CG30485</i>    | FBgn0050485 | 2.20 |       |       |
| <i>CG31038</i>    | FBgn0051038 | 2.20 |       |       |
| <i>regucalcin</i> | FBgn0030362 | 2.20 |       |       |
| <i>CG14857</i>    | FBgn0038262 | 2.20 |       |       |
| <i>GlyP</i>       | FBgn0004507 | 2.19 |       |       |
| <i>Lsd-1</i>      | FBgn0039114 | 2.19 |       |       |
| <i>CG3168</i>     | FBgn0029896 | 2.19 |       |       |
| <i>Dyrk2</i>      | FBgn0016930 | 2.18 |       | 0.448 |
| <i>Tsp42Ea</i>    | FBgn0029508 | 2.17 |       |       |
| <i>CG18063</i>    | FBgn0028856 | 2.17 |       |       |
| <i>dnr1</i>       | FBgn0260866 | 2.17 |       |       |
| <i>Rab23</i>      | FBgn0037364 | 2.16 | 3.31  |       |
| <i>CG4404</i>     | FBgn0030432 | 2.16 | 2.28  |       |
| <i>CG14291</i>    | FBgn0038660 | 2.16 |       |       |
| <i>bbg</i>        | FBgn0087007 | 2.15 | 0.392 |       |
| <i>Hsp23</i>      | FBgn0001224 | 2.15 |       |       |
| <i>clos</i>       | FBgn0261016 | 2.15 |       |       |
| <i>CG32368</i>    | FBgn0052368 | 2.13 |       |       |
| <i>CG43164</i>    | FBgn0262720 | 2.12 |       |       |
| <i>CG13654</i>    | FBgn0039290 | 2.12 | 2.49  |       |
| <i>CG12428</i>    | FBgn0039543 | 2.12 |       |       |
| <i>sick</i>       | FBgn0263873 | 2.11 |       |       |
| <i>CG31436</i>    | FBgn0051436 | 2.11 |       |       |
| <i>CG44251</i>    | FBgn0265186 | 2.11 | 2.21  |       |

|                                   |             |       |       |       |
|-----------------------------------|-------------|-------|-------|-------|
| <i>Inx2</i>                       | FBgn0027108 | 2.11  |       |       |
| <i>CG2065</i>                     | FBgn0033204 | 2.11  | 9.00  | 0.163 |
| <i>CDase</i>                      | FBgn0039774 | 2.10  | 2.07  |       |
| <i>PGRP-SB1</i>                   | FBgn0043578 | 2.10  |       | 0.108 |
| <i>CG12825</i>                    | FBgn0033221 | 2.10  | 2.64  |       |
| <i>brp</i>                        | FBgn0259246 | 2.09  |       |       |
| <i>CG13650</i>                    | FBgn0039277 | 2.08  |       |       |
| <i>MESK2</i>                      | FBgn0043070 | 2.08  |       |       |
| <i>CG31274</i>                    | FBgn0051274 | 2.08  | 0.326 | 0.418 |
| <i>CG10283</i>                    | FBgn0032681 | 2.08  |       |       |
| <i>ebd2</i>                       | FBgn0037076 | 2.08  |       |       |
| <i>Ela</i>                        | FBgn0013949 | 2.08  |       |       |
| <i>pyd</i>                        | FBgn0262614 | 2.06  |       |       |
| <i>CG6231</i>                     | FBgn0038720 | 2.06  |       |       |
| <i>CecB</i>                       | FBgn0000278 | 2.06  |       |       |
| <i>CG14636</i>                    | FBgn0037217 | 2.05  | 0.355 |       |
| <i>veil</i>                       | FBgn0034225 | 2.05  |       |       |
| <i>CG43340</i>                    | FBgn0263077 | 2.05  |       | 2.22  |
| <i>CG30460</i>                    | FBgn0050460 | 2.05  |       |       |
| <i>Cyp6d5</i>                     | FBgn0038194 | 2.05  |       | 0.490 |
| <i>CG31705</i>                    | FBgn0028490 | 2.05  |       |       |
| <i>PGRP-LA</i>                    | FBgn0035975 | 2.05  |       |       |
| <i>CG6701</i>                     | FBgn0033889 | 2.05  |       |       |
| <i>GstD9</i>                      | FBgn0038020 | 2.04  |       |       |
| <i>pdgy</i>                       | FBgn0027601 | 2.03  |       |       |
| <i>spri</i>                       | FBgn0085443 | 2.03  |       |       |
| <i>mlt</i>                        | FBgn0265512 | 2.03  | 4.24  |       |
| <i>GstE6</i>                      | FBgn0063494 | 2.03  | 43.50 | 4.17  |
| <i>CG32436</i>                    | FBgn0052436 | 2.03  |       |       |
| <i>Cyp4e2</i>                     | FBgn0014469 | 2.03  |       |       |
| <i>Gel</i>                        | FBgn0010225 | 2.02  |       |       |
| <i>Sans</i>                       | FBgn0033785 | 2.02  |       |       |
| <i>Tep4</i>                       | FBgn0041180 | 2.02  | 3.86  |       |
| <i>fat-spondin</i>                | FBgn0026721 | 2.01  |       |       |
| <i>HDC03722</i>                   |             | 2.00  |       |       |
| <i>HP1D3csd</i>                   | FBgn0030994 | 2.00  |       |       |
| <i>su(r)</i>                      | FBgn0086450 | 2.00  | 3.20  | 2.17  |
| <i>lh</i>                         | FBgn0263397 | 2.00  | 2.34  |       |
| <b>HP1 depletion effect: DOWN</b> |             |       |       |       |
| <i>CG32850</i>                    | FBgn0052850 | 0.498 | 4.43  |       |
| <i>CG41128</i>                    | FBgn0069923 | 0.490 | 0.338 |       |
| <i>CG3262</i>                     | FBgn0032986 | 0.486 |       |       |
| <i>Dbp80</i>                      | FBgn0024804 | 0.480 |       |       |
| <i>CG32350</i>                    | FBgn0052350 | 0.480 |       |       |
| <i>Acf1</i>                       | FBgn0027620 | 0.480 |       |       |
| <i>Fas2</i>                       | FBgn0000635 | 0.479 |       | 2.11  |
| <i>ND-AGGG</i>                    | FBgn0058002 | 0.477 |       |       |
| <i>PlexB</i>                      | FBgn0025740 | 0.474 |       |       |
| <i>COX4L</i>                      | FBgn0033020 | 0.464 |       |       |
| <i>PlexB</i>                      | FBgn0025740 | 0.455 |       |       |
| <i>CG34330</i>                    | FBgn0085359 | 0.452 | 4.33  |       |
| <i>CG6329</i>                     | FBgn0033872 | 0.435 |       |       |



|                   |             |              |              |              |
|-------------------|-------------|--------------|--------------|--------------|
| <i>Nipped-A</i>   | FBgn0053554 | <b>0.430</b> |              |              |
| <i>CG2709</i>     | FBgn0024977 | <b>0.425</b> |              |              |
| <i>I(2)41Ab</i>   | FBgn0262123 | <b>0.417</b> | <b>4.24</b>  |              |
| <i>dob</i>        | FBgn0030607 | <b>0.402</b> | <b>3.62</b>  |              |
| <i>TpnC41C</i>    | FBgn0013348 | <b>0.398</b> |              |              |
| <i>CG3829</i>     | FBgn0035091 | <b>0.394</b> |              |              |
| <i>HDC20114</i>   |             | <b>0.370</b> |              |              |
| <i>Ser</i>        | FBgn0004197 | <b>0.366</b> | <b>0.385</b> |              |
| <i>Transpac</i>   | FBte0001377 | <b>0.363</b> |              |              |
| <i>CG41099</i>    | FBgn0039955 | <b>0.362</b> |              |              |
| <i>CG3788</i>     | FBgn0034800 | <b>0.353</b> |              |              |
| <i>CG17698</i>    | FBgn0040056 | <b>0.347</b> |              |              |
| <i>br</i>         | FBgn0000210 | <b>0.327</b> |              |              |
| <i>slgA</i>       | FBgn0003423 | <b>0.316</b> | <b>0.345</b> |              |
| <i>mos</i>        | FBgn0033773 | <b>0.309</b> |              |              |
| <i>Caps</i>       | FBgn0053653 | <b>0.284</b> |              |              |
| <i>CR43242</i>    | FBgn0262887 | <b>0.252</b> |              | <b>0.097</b> |
| <i>CG40160</i>    | FBgn0058160 | <b>0.239</b> | <b>0.441</b> |              |
| <i>CR43242</i>    | FBgn0262887 | <b>0.239</b> |              | <b>0.097</b> |
| <i>CG40006</i>    | FBgn0058006 | <b>0.230</b> | <b>28.55</b> |              |
| <i>CG40294</i>    | FBgn0058294 | <b>0.157</b> |              | <b>0.398</b> |
| <i>CG30440</i>    | FBgn0050440 | <b>0.132</b> |              |              |
| <i>Maf1</i>       | FBgn0267861 | <b>0.129</b> |              |              |
| <i>Caps</i>       | FBgn0053653 | <b>0.116</b> |              |              |
| <i>CR45923</i>    | FBgn0267585 | <b>0.093</b> | <b>6.95</b>  |              |
| <i>CG17698</i>    | FBgn0040056 | <b>0.093</b> |              |              |
| <i>CG32017</i>    | FBgn0052017 | <b>0.058</b> | <b>5.13</b>  |              |
| <i>Cht3</i>       | FBgn0250907 | <b>0.029</b> |              |              |
| <i>Su(var)205</i> | FBgn0003607 | <b>0.025</b> |              |              |

Transcripts that are up- or down-regulated by RNAi-mediated depletion of HP1 in Kc cells and H1 in L3 salivary glands or a homozygous null mutation of *Chd1* in L3 larvae. Fold change is calculated from Affymetrix microarray data relative to wild-type control. Transposons, repetitive and presumed heterochromatic sequences (Chr Xh, Chr 2h, Chr 3h and Chr4) are shown in red type.
