# Supplementary material for: A Genetic Screen and Transcript Profiling Reveal a Shared Regulatory Program for Drosophila Linker Histone H1 and Chromatin Remodeler CHD1
Source: PubMed Central journal article supplement (PMC4390582; doi:10.1534/g3.115.016709), 2015-01-27
Supplement: supp_g3.115.016709_TableS4.pdf [file supp_g3.115.016709_TableS4.pdf]

**Table S4** Overlap of transcripts regulated by ISWI, H1 and CHD1.

| SYMBOL/<br>TRANSCRIPT                   | FLYBASE ID  | FOLD CHANGE  |              |              |
|-----------------------------------------|-------------|--------------|--------------|--------------|
|                                         |             | ISWI<br>KD   | H1 KD        | <i>Chd1</i>  |
| <b>ISWI depletion effect: <i>UP</i></b> |             |              |              |              |
| <i>CG42675</i>                          | FBgn0261561 | <b>48.78</b> | <b>0.376</b> |              |
| <i>Ance-5</i>                           | FBgn0035076 | <b>37.27</b> | <b>2.73</b>  |              |
| <i>CG33225</i>                          | FBgn0053225 | <b>27.57</b> | <b>31.76</b> |              |
| <i>Acer</i>                             | FBgn0016122 | <b>24.68</b> | <b>3.27</b>  |              |
| <i>CG14787</i>                          | FBgn0027793 | <b>17.33</b> |              | <b>2.91</b>  |
| <i>CG33465</i>                          | FBgn0053465 | <b>16.53</b> | <b>2.80</b>  |              |
| <i>CG42807</i>                          | FBgn0261989 | <b>16.34</b> |              |              |
| <i>CG9008</i>                           | FBgn0028540 | <b>15.47</b> |              |              |
| <i>Cyp6d5</i>                           | FBgn0038194 | <b>13.46</b> |              | <b>0.490</b> |
| <i>CG45057</i>                          | FBgn0266417 | <b>13.26</b> | <b>2.20</b>  |              |
| <i>GstD7</i>                            | FBgn0010043 | <b>12.65</b> | <b>3.98</b>  | <b>3.61</b>  |
| <i>CG8399</i>                           | FBgn0034067 | <b>12.34</b> | <b>5.09</b>  |              |
| <i>CG30091</i>                          | FBgn0050091 | <b>11.62</b> |              | <b>0.187</b> |
| <i>yellow-f2</i>                        | FBgn0038105 | <b>11.48</b> | <b>5.78</b>  |              |
| <i>nvy</i>                              | FBgn0005636 | <b>10.70</b> |              |              |
| <i>Obp44a</i>                           | FBgn0033268 | <b>10.65</b> | <b>32.99</b> |              |
| <i>zye</i>                              | FBgn0036985 | <b>10.55</b> |              |              |
| <i>CIC-a</i>                            | FBgn0051116 | <b>10.16</b> |              |              |
| <i>CG6357</i>                           | FBgn0033875 | <b>9.69</b>  | <b>10.96</b> |              |
| <i>pgant2</i>                           | FBgn0031530 | <b>9.31</b>  |              |              |
| <i>CG12910</i>                          | FBgn0033502 | <b>9.24</b>  |              |              |
| <i>CG15202</i>                          | FBgn0030271 | <b>9.00</b>  | <b>0.412</b> |              |
| <i>CG5397</i>                           | FBgn0031327 | <b>8.87</b>  | <b>3.33</b>  |              |
| <i>CG13077</i>                          | FBgn0032810 | <b>8.67</b>  |              |              |
| <i>Cht2</i>                             | FBgn0022702 | <b>8.62</b>  |              |              |
| <i>NimB3</i>                            | FBgn0054003 | <b>8.52</b>  |              |              |
| <i>CG31219</i>                          | FBgn0051219 | <b>8.14</b>  |              |              |
| <i>CG17321</i>                          | FBgn0032719 | <b>7.96</b>  |              |              |
| <i>CG5731</i>                           | FBgn0032192 | <b>7.79</b>  | <b>2.72</b>  |              |
| <i>CG33120</i>                          | FBgn0053120 | <b>7.62</b>  |              |              |
| <i>wdp</i>                              | FBgn0034718 | <b>7.45</b>  |              |              |
| <i>Ggamma30A</i>                        | FBgn0267252 | <b>7.22</b>  | <b>3.07</b>  |              |
| <i>CG32483</i>                          | FBgn0052483 | <b>7.18</b>  |              | <b>2.77</b>  |
| <i>Sodh-2</i>                           | FBgn0022359 | <b>7.12</b>  |              |              |
| <i>CG17681</i>                          | FBgn0032668 | <b>7.00</b>  |              |              |
| <i>CG10126</i>                          | FBgn0038088 | <b>6.97</b>  |              |              |
| <i>MESK4</i>                            | FBgn0043069 | <b>6.97</b>  | <b>0.342</b> | <b>0.473</b> |
| <i>Obp49a</i>                           | FBgn0050052 | <b>6.88</b>  |              |              |
| <i>CG10311</i>                          | FBgn0038420 | <b>6.87</b>  |              |              |
| <i>fng</i>                              | FBgn0011591 | <b>6.74</b>  |              |              |
| <i>Gli</i>                              | FBgn0001987 | <b>6.60</b>  |              |              |
| <i>CG16710</i>                          | FBgn0039101 | <b>6.33</b>  |              |              |
| <i>CG14990</i>                          | FBgn0035496 | <b>6.14</b>  |              |              |
| <i>Mtk</i>                              | FBgn0014865 | <b>6.09</b>  |              | <b>0.438</b> |
| <i>mthl14</i>                           | FBgn0052476 | <b>6.02</b>  | <b>15.70</b> |              |
| <i>CG11638</i>                          | FBgn0040351 | <b>5.97</b>  |              |              |

|                 |             |             |              |              |
|-----------------|-------------|-------------|--------------|--------------|
| <i>CG30345</i>  | FBgn0050345 | <b>5.74</b> |              |              |
| <i>CG5001</i>   | FBgn0031322 | <b>5.55</b> |              |              |
| <i>e</i>        | FBgn0000527 | <b>5.46</b> | <b>2.93</b>  | <b>0.042</b> |
| <i>CG42369</i>  | FBgn0259715 | <b>5.45</b> | <b>7.66</b>  |              |
| <i>Mdr49</i>    | FBgn0004512 | <b>5.34</b> | <b>3.38</b>  |              |
| <i>RpS30</i>    | FBgn0038834 | <b>5.33</b> |              |              |
| <i>CG1124</i>   | FBgn0037290 | <b>5.25</b> |              | <b>0.493</b> |
| <i>CG31274</i>  | FBgn0051274 | <b>5.24</b> | <b>0.326</b> | <b>0.418</b> |
| <i>Kal1</i>     | FBgn0039155 | <b>5.17</b> | <b>0.168</b> |              |
| <i>dmGlut</i>   | FBgn0010497 | <b>5.17</b> | <b>0.167</b> |              |
| <i>CG17029</i>  | FBgn0036551 | <b>5.17</b> |              |              |
| <i>Fuca</i>     | FBgn0036169 | <b>5.14</b> | <b>3.88</b>  |              |
| <i>Tsp42Ea</i>  | FBgn0029508 | <b>5.03</b> |              |              |
| <i>qsm</i>      | FBgn0028622 | <b>4.98</b> |              |              |
| <i>lea</i>      | FBgn0002543 | <b>4.97</b> | <b>3.29</b>  |              |
| <i>yellow-c</i> | FBgn0041713 | <b>4.92</b> |              | <b>0.146</b> |
| <i>cad</i>      | FBgn0000251 | <b>4.91</b> | <b>8.04</b>  |              |
| <i>CG6830</i>   | FBgn0037934 | <b>4.83</b> |              |              |
| <i>dpr17</i>    | FBgn0051361 | <b>4.81</b> |              |              |
| <i>CG13377</i>  | FBgn0261446 | <b>4.65</b> |              |              |
| <i>CG11378</i>  | FBgn0040364 | <b>4.62</b> | <b>0.331</b> |              |
| <i>CG9691</i>   | FBgn0030160 | <b>4.55</b> |              |              |
| <i>ChLD3</i>    | FBgn0032598 | <b>4.44</b> |              |              |
| <i>CG17751</i>  | FBgn0038717 | <b>4.43</b> |              |              |
| <i>CG13921</i>  | FBgn0035267 | <b>4.27</b> | <b>4.49</b>  |              |
| <i>twz</i>      | FBgn0034636 | <b>4.25</b> |              | <b>0.232</b> |
| <i>CG30148</i>  | FBgn0050148 | <b>4.22</b> |              |              |
| <i>CG7966</i>   | FBgn0038115 | <b>4.19</b> |              |              |
| <i>CG31743</i>  | FBgn0032618 | <b>4.18</b> |              | <b>2.60</b>  |
| <i>Snap25</i>   | FBgn0011288 | <b>4.17</b> | <b>33.90</b> |              |
| <i>CG9801</i>   | FBgn0037623 | <b>4.13</b> | <b>0.360</b> | <b>0.423</b> |
| <i>CG14516</i>  | FBgn0039640 | <b>4.05</b> |              |              |
| <i>Gs1</i>      | FBgn0001142 | <b>3.89</b> |              |              |
| <i>CG10359</i>  | FBgn0035452 | <b>3.89</b> |              |              |
| <i>Ude</i>      | FBgn0039226 | <b>3.85</b> |              | <b>5.03</b>  |
| <i>Drs</i>      | FBgn0010381 | <b>3.78</b> | <b>4.28</b>  | <b>0.451</b> |
| <i>CG7607</i>   | FBgn0036145 | <b>3.71</b> | <b>3.73</b>  |              |
| <i>CG15772</i>  | FBgn0029799 | <b>3.70</b> |              |              |
| <i>sPLA2</i>    | FBgn0033170 | <b>3.67</b> |              |              |
| <i>CG32313</i>  | FBgn0052313 | <b>3.63</b> |              |              |
| <i>twit</i>     | FBgn0032895 | <b>3.59</b> |              |              |
| <i>PCB</i>      | FBgn0027580 | <b>3.58</b> |              |              |
| <i>Gyc-89Db</i> | FBgn0038436 | <b>3.56</b> |              |              |
| <i>Cyp6d2</i>   | FBgn0034756 | <b>3.53</b> |              |              |
| <i>CG16789</i>  | FBgn0037712 | <b>3.47</b> |              |              |
| <i>Gk</i>       | FBgn0035266 | <b>3.39</b> |              |              |
| <i>Cby</i>      | FBgn0067317 | <b>3.38</b> |              |              |
| <i>CG7860</i>   | FBgn0030653 | <b>3.36</b> |              |              |
| <i>Mmp1</i>     | FBgn0035049 | <b>3.34</b> | <b>11.63</b> | <b>0.264</b> |
| <i>yellow-b</i> | FBgn0032601 | <b>3.34</b> |              |              |
| <i>Pka-C3</i>   | FBgn0000489 | <b>3.28</b> |              |              |
| <i>CG7781</i>   | FBgn0032021 | <b>3.26</b> |              |              |

|                    |             |             |              |              |
|--------------------|-------------|-------------|--------------|--------------|
| <i>Cyp6a17</i>     | FBgn0015714 | <b>3.22</b> | <b>3.26</b>  |              |
| <i>CG45263</i>     | FBgn0266801 | <b>3.22</b> |              |              |
| <i>GlcAT-S</i>     | FBgn0032135 | <b>3.20</b> | <b>0.331</b> |              |
| <i>CG10877</i>     | FBgn0038804 | <b>3.18</b> | <b>0.157</b> |              |
| <i>btn</i>         | FBgn0014949 | <b>3.16</b> |              |              |
| <i>PlexB</i>       | FBgn0025740 | <b>3.14</b> |              |              |
| <i>CG3505</i>      | FBgn0038250 | <b>3.10</b> |              |              |
| <i>CG30380</i>     | FBgn0050380 | <b>3.09</b> |              |              |
| <i>SkpB</i>        | FBgn0026176 | <b>3.08</b> |              |              |
| <i>GLaz</i>        | FBgn0033799 | <b>3.07</b> | <b>4.64</b>  |              |
| <i>Cyp6a23</i>     | FBgn0033978 | <b>3.07</b> | <b>16.25</b> | <b>5.98</b>  |
| <i>Dhc36C</i>      | FBgn0013810 | <b>3.07</b> |              |              |
| <i>CG15343</i>     | FBgn0030029 | <b>3.07</b> | <b>0.124</b> | <b>0.423</b> |
| <i>ft</i>          | FBgn0001075 | <b>3.06</b> |              |              |
| <i>MESK2</i>       | FBgn0043070 | <b>3.04</b> |              |              |
| <i>CG6218</i>      | FBgn0038321 | <b>3.01</b> |              |              |
| <i>Ama</i>         | FBgn0000071 | <b>3.01</b> | <b>2.27</b>  | <b>0.371</b> |
| <i>Oat</i>         | FBgn0022774 | <b>3.00</b> | <b>0.077</b> | <b>0.306</b> |
| <i>fax</i>         | FBgn0014163 | <b>2.98</b> |              |              |
| <i>CG34288</i>     | FBgn0085317 | <b>2.96</b> |              |              |
| <i>baz</i>         | FBgn0000163 | <b>2.96</b> | <b>0.369</b> |              |
| <i>CG4630</i>      | FBgn0033809 | <b>2.95</b> | <b>0.301</b> |              |
| <i>CG5783</i>      | FBgn0032670 | <b>2.95</b> | <b>0.388</b> |              |
| <i>LamC</i>        | FBgn0010397 | <b>2.95</b> |              | <b>2.08</b>  |
| <i>CG3625</i>      | FBgn0031245 | <b>2.92</b> |              |              |
| <i>Cyp6a22</i>     | FBgn0013773 | <b>2.92</b> | <b>7.50</b>  |              |
| <i>PPO1</i>        | FBgn0261362 | <b>2.92</b> | <b>6.89</b>  |              |
| <i>CG12262</i>     | FBgn0035811 | <b>2.91</b> |              |              |
| <i>miple2</i>      | FBgn0029002 | <b>2.87</b> |              |              |
| <i>LpR1</i>        | FBgn0066101 | <b>2.87</b> |              |              |
| <i>Jheh1</i>       | FBgn0010053 | <b>2.85</b> |              |              |
| <i>slgA</i>        | FBgn0003423 | <b>2.85</b> | <b>0.345</b> |              |
| <i>Pepck</i>       | FBgn0003067 | <b>2.84</b> |              | <b>2.30</b>  |
| <i>Cyp4d20</i>     | FBgn0035344 | <b>2.81</b> |              |              |
| <i>CG5577</i>      | FBgn0036759 | <b>2.81</b> | <b>0.359</b> |              |
| <i>CG34409</i>     | FBgn0085438 | <b>2.80</b> |              |              |
| <i>brv3</i>        | FBgn0040333 | <b>2.80</b> |              |              |
| <i>AdamTS-A</i>    | FBgn0038341 | <b>2.79</b> | <b>0.207</b> |              |
| <i>rgn</i>         | FBgn0261258 | <b>2.78</b> | <b>11.07</b> |              |
| <i>Dat</i>         | FBgn0019643 | <b>2.74</b> |              |              |
| <i>CG8547</i>      | FBgn0033919 | <b>2.72</b> |              |              |
| <i>Gbp</i>         | FBgn0034199 | <b>2.72</b> |              | <b>0.429</b> |
| <i>CG10232</i>     | FBgn0039108 | <b>2.68</b> | <b>4.13</b>  |              |
| <i>CG14036</i>     | FBgn0031677 | <b>2.68</b> |              |              |
| <i>HDC15448</i>    |             | <b>2.66</b> |              |              |
| <i>corolla</i>     | FBgn0267967 | <b>2.66</b> |              |              |
| <i>Ror</i>         | FBgn0010407 | <b>2.66</b> |              |              |
| <i>pdgy</i>        | FBgn0027601 | <b>2.66</b> |              |              |
| <i>fra</i>         | FBgn0011592 | <b>2.65</b> |              |              |
| <i>CG1969</i>      | FBgn0039690 | <b>2.65</b> | <b>0.218</b> |              |
| <i>S.C3R003414</i> |             | <b>2.64</b> |              |              |
| <i>wus</i>         | FBgn0030805 | <b>2.62</b> |              |              |

|                   |             |             |              |              |
|-------------------|-------------|-------------|--------------|--------------|
| <i>CG8353</i>     | FBgn0032002 | <b>2.62</b> |              |              |
| <i>CG10764</i>    | FBgn0034221 | <b>2.61</b> |              | <b>0.390</b> |
| <i>CG30503</i>    | FBgn0050503 | <b>2.60</b> |              | <b>3.14</b>  |
| <i>CG11983</i>    | FBgn0037654 | <b>2.60</b> |              |              |
| <i>CG11897</i>    | FBgn0039644 | <b>2.59</b> | <b>5.52</b>  | <b>2.14</b>  |
| <i>Mmp1</i>       | FBgn0035049 | <b>2.57</b> | <b>9.53</b>  | <b>0.264</b> |
| <i>Cyp310a1</i>   | FBgn0032693 | <b>2.57</b> | <b>6.31</b>  |              |
| <i>Cyp4d2</i>     | FBgn0011576 | <b>2.57</b> |              |              |
| <i>whd</i>        | FBgn0261862 | <b>2.56</b> |              |              |
| <i>CG8066</i>     | FBgn0038243 | <b>2.55</b> | <b>5.94</b>  |              |
| <i>betaTub60D</i> | FBgn0003888 | <b>2.55</b> | <b>3.13</b>  |              |
| <i>CG32436</i>    | FBgn0052436 | <b>2.53</b> |              |              |
| <i>Cyp6a20</i>    | FBgn0033980 | <b>2.52</b> |              |              |
| <i>Cyp12a4</i>    | FBgn0038681 | <b>2.52</b> | <b>3.42</b>  |              |
| <i>Src64B</i>     | FBgn0262733 | <b>2.50</b> |              |              |
| <i>c(2)M</i>      | FBgn0028525 | <b>2.50</b> | <b>2.93</b>  |              |
| <i>Npc2b</i>      | FBgn0038198 | <b>2.49</b> |              |              |
| <i>CG42390</i>    | FBgn0259736 | <b>2.48</b> | <b>0.464</b> | <b>2.51</b>  |
| <i>mbc</i>        | FBgn0015513 | <b>2.47</b> |              |              |
| <i>CG31751</i>    | FBgn0086909 | <b>2.47</b> | <b>0.375</b> |              |
| <i>Adk3</i>       | FBgn0042094 | <b>2.47</b> |              |              |
| <i>Spn27A</i>     | FBgn0028990 | <b>2.47</b> |              |              |
| <i>dpp</i>        | FBgn0000490 | <b>2.46</b> |              |              |
| <i>Mmp1</i>       | FBgn0035049 | <b>2.46</b> | <b>15.55</b> | <b>0.264</b> |
| <i>CG17549</i>    | FBgn0032774 | <b>2.44</b> |              |              |
| <i>CG34331</i>    | FBgn0085360 | <b>2.44</b> |              |              |
| <i>Hydr1</i>      | FBgn0033382 | <b>2.43</b> |              |              |
| <i>CG32280</i>    | FBgn0052280 | <b>2.43</b> |              |              |
| <i>Tequila</i>    | FBgn0023479 | <b>2.43</b> |              |              |
| <i>Atpalpha</i>   | FBgn0002921 | <b>2.42</b> |              |              |
| <i>nrv3</i>       | FBgn0032946 | <b>2.42</b> | <b>8.16</b>  |              |
| <i>Hsp27</i>      | FBgn0001226 | <b>2.41</b> |              | <b>0.457</b> |
| <i>corn</i>       | FBgn0259173 | <b>2.41</b> | <b>12.44</b> |              |
| <i>CG17350</i>    | FBgn0032772 | <b>2.40</b> |              |              |
| <i>CG15544</i>    | FBgn0039804 | <b>2.40</b> |              | <b>0.406</b> |
| <i>CG8501</i>     | FBgn0033724 | <b>2.40</b> |              |              |
| <i>CG12206</i>    | FBgn0029662 | <b>2.40</b> |              |              |
| <i>GlyP</i>       | FBgn0004507 | <b>2.39</b> |              |              |
| <i>Tsp42Ed</i>    | FBgn0029507 | <b>2.39</b> |              |              |
| <i>NtR</i>        | FBgn0029147 | <b>2.39</b> | <b>2.51</b>  |              |
| <i>CG7142</i>     | FBgn0038595 | <b>2.38</b> | <b>5.56</b>  |              |
| <i>CG15093</i>    | FBgn0034390 | <b>2.37</b> | <b>2.02</b>  |              |
| <i>CDase</i>      | FBgn0039774 | <b>2.36</b> | <b>2.07</b>  |              |
| <i>sano</i>       | FBgn0034408 | <b>2.35</b> | <b>4.83</b>  |              |
| <i>EF-G2</i>      | FBgn0051159 | <b>2.35</b> |              |              |
| <i>Dmtn</i>       | FBgn0037443 | <b>2.34</b> |              |              |
| <i>CG1969</i>     | FBgn0039690 | <b>2.34</b> | <b>0.189</b> |              |
| <i>CG13907</i>    | FBgn0035173 | <b>2.33</b> |              |              |
| <i>sdk</i>        | FBgn0021764 | <b>2.33</b> |              |              |
| <i>CG40115</i>    | FBgn0058115 | <b>2.33</b> | <b>10.26</b> |              |
| <i>CG10824</i>    | FBgn0038865 | <b>2.30</b> | <b>2.24</b>  |              |
| <i>CG14984</i>    | FBgn0035480 | <b>2.30</b> | <b>2.07</b>  |              |

|                    |             |             |              |              |
|--------------------|-------------|-------------|--------------|--------------|
| <i>Jabba</i>       | FBgn0259682 | <b>2.30</b> |              |              |
| <i>Cyp6a13</i>     | FBgn0033304 | <b>2.30</b> | <b>5.64</b>  |              |
| <i>CG17919</i>     | FBgn0037433 | <b>2.29</b> | <b>9.35</b>  |              |
| <i>Ance</i>        | FBgn0012037 | <b>2.28</b> |              |              |
| <i>CG18508</i>     | FBgn0028746 | <b>2.28</b> |              |              |
| <i>CG33111</i>     | FBgn0053111 | <b>2.28</b> |              |              |
| <i>Itgbetanu</i>   | FBgn0010395 | <b>2.27</b> |              |              |
| <i>CG43658</i>     | FBgn0263706 | <b>2.27</b> |              |              |
| <i>CG16947</i>     | FBgn0031816 | <b>2.27</b> | <b>0.285</b> |              |
| <i>Cyp12d1-d</i>   | FBgn0053503 | <b>2.26</b> |              |              |
| <i>CG33181</i>     | FBgn0053181 | <b>2.26</b> | <b>7.63</b>  |              |
| <i>CG13252</i>     | FBgn0037016 | <b>2.25</b> | <b>0.440</b> |              |
| <i>Asph</i>        | FBgn0034075 | <b>2.25</b> | <b>0.427</b> | <b>0.308</b> |
| <i>dnd</i>         | FBgn0038916 | <b>2.25</b> |              |              |
| <i>Mctp</i>        | FBgn0034389 | <b>2.25</b> | <b>0.300</b> | <b>2.95</b>  |
| <i>CG15914</i>     | FBgn0030700 | <b>2.24</b> |              |              |
| <i>dlp</i>         | FBgn0041604 | <b>2.24</b> |              |              |
| <i>bgcn</i>        | FBgn0004581 | <b>2.23</b> |              |              |
| <i>Apoltp</i>      | FBgn0032136 | <b>2.22</b> | <b>2.89</b>  | <b>5.70</b>  |
| <i>CG40115</i>     | FBgn0058115 | <b>2.22</b> | <b>7.20</b>  |              |
| <i>CG3831</i>      | FBgn0034804 | <b>2.22</b> |              | <b>0.480</b> |
| <i>CG5853</i>      | FBgn0032167 | <b>2.20</b> |              |              |
| <i>CG12746</i>     | FBgn0037341 | <b>2.20</b> |              |              |
| <i>springer</i>    | FBte0000333 | <b>2.19</b> |              |              |
| <i>SD02481</i>     | FBcl0277517 | <b>2.18</b> |              |              |
| <i>fat-spondin</i> | FBgn0026721 | <b>2.18</b> |              |              |
| <i>Fem-1</i>       | FBgn0034542 | <b>2.17</b> |              |              |
| <i>Oatp30B</i>     | FBgn0032123 | <b>2.17</b> |              |              |
| <i>mthl5</i>       | FBgn0037960 | <b>2.17</b> |              | <b>0.476</b> |
| <i>SAK</i>         | FBgn0026371 | <b>2.16</b> |              |              |
| <i>Vha68-1</i>     | FBgn0265262 | <b>2.15</b> | <b>2.42</b>  |              |
| <i>norpA</i>       | FBgn0262738 | <b>2.15</b> |              |              |
| <i>Ect3</i>        | FBgn0260746 | <b>2.15</b> | <b>2.21</b>  |              |
| <i>CG3038</i>      | FBgn0040373 | <b>2.14</b> |              |              |
| <i>CG32032</i>     | FBgn0043806 | <b>2.14</b> |              |              |
| <i>CG9547</i>      | FBgn0031824 | <b>2.13</b> |              |              |
| <i>CG12643</i>     | FBgn0040942 | <b>2.12</b> |              |              |
| <i>CG31974</i>     | FBgn0051974 | <b>2.12</b> | <b>4.74</b>  | <b>2.23</b>  |
| <i>CAH1</i>        | FBgn0027844 | <b>2.11</b> | <b>2.25</b>  | <b>0.493</b> |
| <i>mtg</i>         | FBgn0260386 | <b>2.11</b> | <b>2.25</b>  | <b>2.83</b>  |
| <i>CG30441</i>     | FBgn0050441 | <b>2.11</b> |              |              |
| <i>TM4SF</i>       | FBgn0020372 | <b>2.11</b> |              |              |
| <i>Cpr49Ag</i>     | FBgn0033730 | <b>2.10</b> |              |              |
| <i>ImpE3</i>       | FBgn0001255 | <b>2.10</b> |              | <b>0.171</b> |
| <i>CG10516</i>     | FBgn0036549 | <b>2.10</b> |              | <b>0.293</b> |
| <i>zuc</i>         | FBgn0261266 | <b>2.09</b> |              |              |
| <i>Tret1-1</i>     | FBgn0050035 | <b>2.07</b> |              |              |
| <i>Muc68Ca</i>     | FBgn0036181 | <b>2.07</b> |              | <b>7.36</b>  |
| <i>CG17754</i>     | FBgn0030114 | <b>2.07</b> |              | <b>0.490</b> |
| <i>CG45186</i>     | FBgn0266696 | <b>2.06</b> | <b>0.433</b> |              |
| <i>Atet</i>        | FBgn0020762 | <b>2.06</b> |              | <b>0.470</b> |
| <i>CG5080</i>      | FBgn0031313 | <b>2.06</b> |              |              |

|                                    |             |       |       |       |
|------------------------------------|-------------|-------|-------|-------|
| <i>cyc</i>                         | FBgn0023094 | 2.05  |       |       |
| <i>CG33947</i>                     | FBgn0083068 | 2.05  |       |       |
| <i>SLC5A11</i>                     | FBgn0031998 | 2.05  |       |       |
| <i>CG14523</i>                     | FBgn0039612 | 2.04  |       |       |
| <i>CG42684</i>                     | FBgn0261570 | 2.04  |       |       |
| <i>CG17265</i>                     | FBgn0031488 | 2.03  |       |       |
| <i>CG42327</i>                     | FBgn0259227 | 2.03  |       |       |
| <i>CG5096</i>                      | FBgn0032235 | 2.03  | 3.96  |       |
| <i>CG9914</i>                      | FBgn0030737 | 2.03  | 4.84  |       |
| <i>Dip3</i>                        | FBgn0040465 | 2.03  |       |       |
| <i>mthl10</i>                      | FBgn0035132 | 2.03  |       |       |
| <i>Dark</i>                        | FBgn0263864 | 2.02  | 0.249 | 0.418 |
| <i>Apf</i>                         | FBgn0051713 | 2.02  |       |       |
| <i>CG6330</i>                      | FBgn0039464 | 2.01  |       |       |
| <i>ItgalphaPS4</i>                 | FBgn0034005 | 2.01  | 3.91  |       |
| <i>FER</i>                         | FBgn0000723 | 2.01  |       |       |
| <i>CG41128</i>                     | FBgn0069923 | 2.00  | 0.338 |       |
| <b>ISWI depletion effect: DOWN</b> |             |       |       |       |
| <i>CG40191</i>                     | FBgn0058191 | 0.498 |       |       |
| <i>laccase2</i>                    | FBgn0259247 | 0.498 |       |       |
| <i>CG7322</i>                      | FBgn0030968 | 0.495 |       |       |
| <i>ppk29</i>                       | FBgn0034965 | 0.495 |       |       |
| <i>CG31619</i>                     | FBgn0051619 | 0.495 | 2.82  |       |
| <i>CG12391</i>                     | FBgn0033581 | 0.494 |       |       |
| <i>Nap1</i>                        | FBgn0015268 | 0.494 |       |       |
| <i>Gpo-1</i>                       | FBgn0022160 | 0.493 | 3.37  | 3.32  |
| <i>Doc3</i>                        | FBgn0035954 | 0.490 |       |       |
| <i>HDC14725</i>                    |             | 0.488 |       |       |
| <i>CG10433</i>                     | FBgn0034638 | 0.487 | 3.25  | 3.05  |
| <i>CG8765</i>                      | FBgn0036900 | 0.487 |       |       |
| <i>HDC16707</i>                    |             | 0.485 |       |       |
| <i>cactin</i>                      | FBgn0031114 | 0.484 | 2.77  |       |
| <i>Marcal1</i>                     | FBgn0031655 | 0.484 |       |       |
| <i>lute</i>                        | FBgn0262871 | 0.484 | 0.286 |       |
| <i>CG32625</i>                     | FBgn0052625 | 0.482 | 39.17 |       |
| <i>ham</i>                         | FBgn0045852 | 0.480 |       |       |
| <i>CG7900</i>                      | FBgn0037548 | 0.476 | 2.96  | 2.71  |
| <i>CG7120</i>                      | FBgn0035888 | 0.475 |       |       |
| <i>Gs2</i>                         | FBgn0001145 | 0.474 | 3.09  |       |
| <i>Cdep</i>                        | FBgn0265082 | 0.472 | 0.481 |       |
| <i>mgl</i>                         | FBgn0261260 | 0.471 |       |       |
| <i>Arpc3B</i>                      | FBgn0065032 | 0.470 | 30.56 |       |
| <i>Sp7</i>                         | FBgn0037515 | 0.466 |       | 0.401 |
| <i>CG31997</i>                     | FBgn0051997 | 0.465 | 3.22  |       |
| <i>Aats-val</i>                    | FBgn0027079 | 0.465 |       |       |
| <i>Eip55E</i>                      | FBgn0000566 | 0.463 |       |       |
| <i>Aats-asn</i>                    | FBgn0086443 | 0.456 |       |       |
| <i>CG40131</i>                     | FBgn0058131 | 0.454 |       |       |
| <i>CG34228</i>                     | FBgn0085257 | 0.454 |       |       |
| <i>CG18747</i>                     | FBgn0042104 | 0.453 |       |       |
| <i>blanks</i>                      | FBgn0035608 | 0.453 | 98.58 | 0.321 |
| <i>CG44251</i>                     | FBgn0265186 | 0.450 | 2.21  |       |

|                   |             |              |               |             |
|-------------------|-------------|--------------|---------------|-------------|
| <i>PGRP-SA</i>    | FBgn0030310 | <b>0.449</b> | <b>2.20</b>   |             |
| <i>squ</i>        | FBgn0267347 | <b>0.448</b> |               |             |
| <i>CG12288</i>    | FBgn0032620 | <b>0.447</b> | <b>5.29</b>   |             |
| <i>CG42724</i>    | FBgn0261641 | <b>0.443</b> |               |             |
| <i>Taf2</i>       | FBgn0011836 | <b>0.443</b> |               |             |
| <i>Nop60B</i>     | FBgn0259937 | <b>0.443</b> | <b>3.70</b>   |             |
| <i>gce</i>        | FBgn0261703 | <b>0.443</b> |               |             |
| <i>CG1503</i>     | FBgn0031157 | <b>0.443</b> |               |             |
| <i>CG10089</i>    | FBgn0036369 | <b>0.436</b> | <b>13.85</b>  |             |
| <i>Ssk</i>        | FBgn0036945 | <b>0.431</b> |               |             |
| <i>Ac3</i>        | FBgn0023416 | <b>0.430</b> |               |             |
| <i>r-l</i>        | FBgn0003257 | <b>0.430</b> |               |             |
| <i>CG32088</i>    | FBgn0052088 | <b>0.430</b> |               |             |
| <i>CG14798</i>    | FBgn0029588 | <b>0.428</b> | <b>3.41</b>   |             |
| <i>sgll</i>       | FBgn0051472 | <b>0.424</b> |               |             |
| <i>CG32795</i>    | FBgn0040384 | <b>0.422</b> | <b>0.468</b>  |             |
| <i>png</i>        | FBgn0000826 | <b>0.420</b> |               |             |
| <i>CG1550</i>     | FBgn0033225 | <b>0.419</b> |               |             |
| <i>CG30339</i>    | FBgn0050339 | <b>0.417</b> |               |             |
| <i>CG18643</i>    | FBgn0037898 | <b>0.415</b> |               |             |
| <i>CG7458</i>     | FBgn0037144 | <b>0.413</b> |               | <b>2.06</b> |
| <i>CG2709</i>     | FBgn0024977 | <b>0.411</b> |               |             |
| <i>Aats-trp</i>   | FBgn0010803 | <b>0.411</b> | <b>0.171</b>  |             |
| <i>CG9902</i>     | FBgn0030757 | <b>0.411</b> |               |             |
| <i>CG6912</i>     | FBgn0038290 | <b>0.408</b> |               |             |
| <i>Gip</i>        | FBgn0011770 | <b>0.407</b> |               |             |
| <i>CG30340</i>    | FBgn0050340 | <b>0.406</b> |               |             |
| <i>sage</i>       | FBgn0037672 | <b>0.404</b> | <b>0.183</b>  |             |
| <i>HDC17231</i>   |             | <b>0.399</b> |               |             |
| <i>CG32017</i>    | FBgn0052017 | <b>0.396</b> | <b>5.13</b>   |             |
| <i>Cyt-b5-r</i>   | FBgn0000406 | <b>0.393</b> | <b>10.17</b>  | <b>2.57</b> |
| <i>Mal-B2</i>     | FBgn0032382 | <b>0.391</b> |               |             |
| <i>CG8613</i>     | FBgn0033924 | <b>0.390</b> |               |             |
| <i>f-cup</i>      | FBgn0028487 | <b>0.385</b> |               |             |
| <i>CG31769</i>    | FBgn0051769 | <b>0.380</b> | <b>2.49</b>   | <b>2.33</b> |
| <i>trk</i>        | FBgn0003751 | <b>0.380</b> | <b>4.61</b>   |             |
| <i>CG32196</i>    | FBgn0052196 | <b>0.378</b> |               |             |
| <i>CG1674</i>     | FBgn0039897 | <b>0.378</b> |               |             |
| <i>GstO1</i>      | FBgn0035907 | <b>0.377</b> | <b>6.65</b>   |             |
| <i>CG4793</i>     | FBgn0028514 | <b>0.374</b> | <b>15.37</b>  |             |
| <i>alpha-Est8</i> | FBgn0015576 | <b>0.374</b> |               | <b>2.83</b> |
| <i>Bx</i>         | FBgn0265598 | <b>0.373</b> | <b>2.05</b>   |             |
| <i>CG14545</i>    | FBgn0040602 | <b>0.372</b> | <b>157.17</b> |             |
| <i>CG14615</i>    | FBgn0031184 | <b>0.370</b> | <b>2.16</b>   |             |
| <i>CG4587</i>     | FBgn0028863 | <b>0.370</b> |               |             |
| <i>CG15100</i>    | FBgn0034401 | <b>0.362</b> |               |             |
| <i>nonA-l</i>     | FBgn0015520 | <b>0.353</b> |               |             |
| <i>CG30010</i>    | FBgn0050010 | <b>0.352</b> |               |             |
| <i>CG18586</i>    | FBgn0035642 | <b>0.347</b> |               |             |
| <i>CG1677</i>     | FBgn0029941 | <b>0.346</b> |               |             |
| <i>CT32987</i>    |             | <b>0.346</b> |               |             |
| <i>CG9305</i>     | FBgn0032512 | <b>0.342</b> |               |             |

|                    |             |              |              |              |
|--------------------|-------------|--------------|--------------|--------------|
| <i>CG10063</i>     | FBgn0035727 | <b>0.335</b> |              |              |
| <i>CG5568</i>      | FBgn0035641 | <b>0.334</b> |              |              |
| <i> fend</i>       | FBgn0030090 | <b>0.324</b> | <b>3.52</b>  |              |
| <i>CG15820</i>     | FBgn0035312 | <b>0.322</b> |              |              |
| <i>Vago</i>        | FBgn0030262 | <b>0.322</b> | <b>2.46</b>  |              |
| <i>Sox102F</i>     | FBgn0039938 | <b>0.321</b> |              |              |
| <i>CG9837</i>      | FBgn0037635 | <b>0.320</b> |              | <b>0.441</b> |
| <i>aub</i>         | FBgn0000146 | <b>0.319</b> |              |              |
| <i>ham</i>         | FBgn0045852 | <b>0.301</b> |              |              |
| <i>CG16888</i>     | FBgn0032533 | <b>0.301</b> |              |              |
| <i>blot</i>        | FBgn0027660 | <b>0.298</b> | <b>0.273</b> |              |
| <i>TfIIAlpha</i>   | FBgn0010282 | <b>0.292</b> |              |              |
| <i>CG31619</i>     | FBgn0051619 | <b>0.291</b> |              |              |
| <i>CG5285</i>      | FBgn0038490 | <b>0.291</b> | <b>2.33</b>  |              |
| <i>betaTub97EF</i> | FBgn0003890 | <b>0.284</b> |              |              |
| <i>CG17928</i>     | FBgn0032603 | <b>0.280</b> | <b>2.79</b>  |              |
| <i>stg1</i>        | FBgn0064123 | <b>0.270</b> |              |              |
| <i>CG34330</i>     | FBgn0085359 | <b>0.260</b> | <b>4.33</b>  |              |
| <i>CG32582</i>     | FBgn0052582 | <b>0.252</b> |              |              |
| <i>AGO3</i>        | FBgn0250816 | <b>0.250</b> | <b>11.47</b> |              |
| <i>GstE13</i>      | FBgn0033381 | <b>0.246</b> |              |              |
| <i>CG8336</i>      | FBgn0036020 | <b>0.244</b> |              |              |
| <i>CG43103</i>     | FBgn0262563 | <b>0.239</b> | <b>2.59</b>  |              |
| <i>veil</i>        | FBgn0034225 | <b>0.232</b> |              |              |
| <i>CG5144</i>      | FBgn0035957 | <b>0.223</b> |              |              |
| <i>CG3457</i>      | FBgn0024984 | <b>0.220</b> |              |              |
| <i>piwi</i>        | FBgn0004872 | <b>0.209</b> |              |              |
| <i>CG10581</i>     | FBgn0037046 | <b>0.206</b> | <b>5.98</b>  |              |
| <i>CG4872</i>      | FBgn0030799 | <b>0.183</b> | <b>10.25</b> |              |
| <i>Nxf3</i>        | FBgn0263232 | <b>0.183</b> |              |              |
| <i>Ugt36Bc</i>     | FBgn0040260 | <b>0.181</b> |              |              |
| <i>CG4210</i>      | FBgn0038302 | <b>0.169</b> | <b>2.30</b>  |              |
| <i>Nrg</i>         | FBgn0264975 | <b>0.144</b> |              |              |
| <i>CG13602</i>     | FBgn0264740 | <b>0.130</b> |              |              |
| <i>lswi</i>        | FBgn0011604 | <b>0.126</b> |              |              |
| <i>Nrg</i>         | FBgn0264975 | <b>0.113</b> |              |              |
| <i>eIF4E-6</i>     | FBgn0039622 | <b>0.112</b> |              |              |
| <i>fu12</i>        | FBgn0026718 | <b>0.101</b> | <b>3.56</b>  |              |
| <i>CG5367</i>      | FBgn0032228 | <b>0.053</b> |              |              |

Transcripts that are up- or down-regulated by RNAi-mediated depletion of ISWI in SL2 cells and H1 in L3 salivary glands or a homozygous null mutation of *Chd1* in L3 larvae. Fold change is calculated from Affymetrix microarray data relative to wild-type control.
